# Supplementary material for: Regiospecific deoxygenative deuteration of ketones via HOME chemistry
Source: Royal Society of Chemistry journal article supplement (doi:10.1039/d3qo00143a), 2023-01-01
Supplement: d3qo00143a1.pdf [file d3qo00143a1.pdf]

## Supplemental Information

### Regiospecific Deoxygenative Deuteration of Ketones *via* HOME Chemistry

Ruohua Gui,<sup>a</sup> and Chao-Jun Li<sup>a,\*</sup>

<sup>a</sup>Department of Chemistry, FQRNT Center for Green Chemistry and Catalysis, McGill University,  
801 Sherbooke Street West, Montreal, Quebec H3A 0B8, Canada

*Email: cj.li@mcgill.ca*

#### Table of Contents

|                                                                                                                        |     |
|------------------------------------------------------------------------------------------------------------------------|-----|
| <b>I. General Methods</b> .....                                                                                        | S2  |
| <b>II. Optimization of Reaction Conditions</b> .....                                                                   | S2  |
| <b>III. Other Substrates</b> .....                                                                                     | S4  |
| <b>IV. General Procedure for the Deoxygenation of Ketones</b> .....                                                    | S6  |
| <b>V. Characterization of Products</b> .....                                                                           | S6  |
| <b>VI. References</b> .....                                                                                            | S9  |
| <b>VII. Copies of IR, HRMS, <sup>1</sup>H NMR, <sup>2</sup>D NMR, <sup>13</sup>C NMR, and <sup>19</sup>F NMR</b> ..... | S10 |

## I. General Methods

All reagents and solvents were purchased from commercial sources (Sigma-Aldrich) and used without further purification unless otherwise stated. Ru-PNN was purchased from Sigma-Aldrich, and  $\text{N}_2\text{D}_4 \cdot \text{D}_2\text{O}$  (98% purity) was purchased from Alfa Chemistry. All reactions were carried out under a nitrogen atmosphere unless otherwise stated. Column chromatography was performed on silica gel (200-300 mesh) and visualized with ultraviolet light. Diethyl ether and pentane were used as eluents.  $^1\text{H}$ ,  $^2\text{D}$  and  $^{19}\text{F}$  NMR spectra were taken on Bruker AV400, Varian Mercury 400, and Varian/Agilent QANUC 500 with TMS as an internal standard and  $\text{CDCl}_3$  as solvent unless otherwise stated.  $^{13}\text{C}$  NMR spectra were taken on QANUC 800 with 10 seconds relaxation delay to visualize the methylene signal.<sup>1</sup> GC-MS analyses were performed with a Thermo TRACE 1300 ISQ LT spectrometer.

## II. Optimization of Reaction Conditions

1) Table S1. Screening additive and deuterium hydrazine purity in  $\text{CD}_3\text{OD}$ <sup>a</sup>

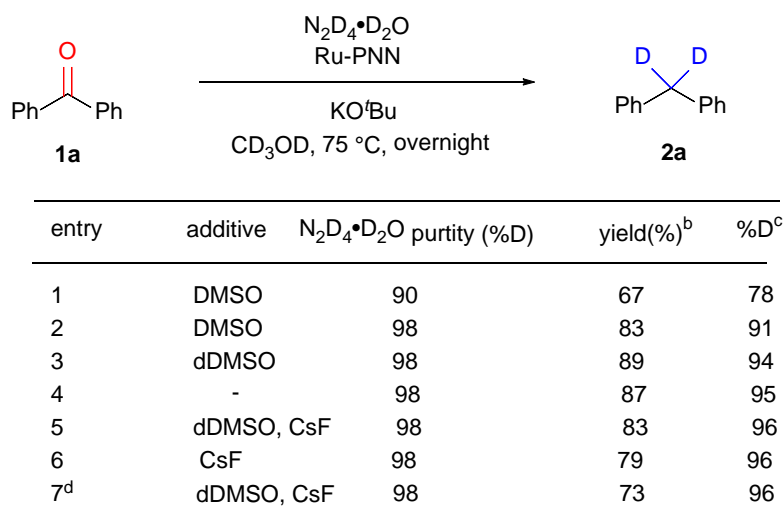

<sup>a</sup> **1a** (36.5 mg, 0.2 mmol, 1.0 equiv),  $\text{N}_2\text{D}_4 \cdot \text{D}_2\text{O}$  (50  $\mu\text{L}$ , 1.0 mmol, 5.0 equiv),  $\text{CD}_3\text{OD}$  (0.2 mL), Ru-PNN (4.5 mg, 0.006 mmol, 3 mol%), KOtBu (44.8 mg, 0.4 mmol, 2.0 equiv), additive: DMSO (2.6  $\mu\text{L}$ , 0.04 mmol, 20 mol%), DMSO- $\text{d}_6$  (2.6  $\mu\text{L}$ , 0.04 mmol, 20 mol%), CsF (15 mg, 0.1 mmol, 50 mol%), 75°C, overnight, under  $\text{N}_2$ . <sup>b</sup> Yields were determined by crude  $^1\text{H}$  NMR using mesitylene as an internal standard. <sup>c</sup> Deuterium contents were determined by crude  $^2\text{D}$  NMR using  $\text{CDCl}_3$  as an internal standard. <sup>d</sup> Dry  $\text{CD}_3\text{OD}$  was used from ampoule.

2) Table S2. Screening the amount of CsF in CD<sub>3</sub>OD<sup>a</sup>

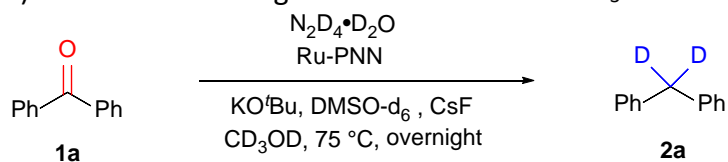

| entry | CsF (equiv) | yield(%) <sup>b</sup> | %D <sup>c</sup> |
|-------|-------------|-----------------------|-----------------|
| 1     | 0.5         | 73                    | 96              |
| 2     | 1           | 73                    | 92              |
| 3     | 1.5         | 65                    | 92              |

<sup>a</sup> **1a** (36.5 mg, 0.2 mmol, 1.0 equiv), N<sub>2</sub>D<sub>4</sub>·D<sub>2</sub>O (50 μL, 1.0 mmol, 5.0 equiv), dry CD<sub>3</sub>OD (0.2 mL), Ru-PNN (4.5 mg, 0.006 mmol, 3 mol%), KO<sup>t</sup>Bu (44.8 mg, 0.4 mmol, 2.0 equiv), additive: DMSO-d<sub>6</sub> (2.6 μL, 0.04 mmol, 20 mol%), CsF (15 mg, 0.1 mmol, 50 mol%), 75°C, overnight, under N<sub>2</sub>. <sup>b</sup> Yields were determined by crude <sup>1</sup>H NMR using mesitylene as an internal standard. <sup>c</sup> Deuterium contents were determined by crude <sup>2</sup>D NMR using CDCl<sub>3</sub> as an internal standard.

3) Table S3. Screening additive in CD<sub>3</sub>OD<sup>a</sup>

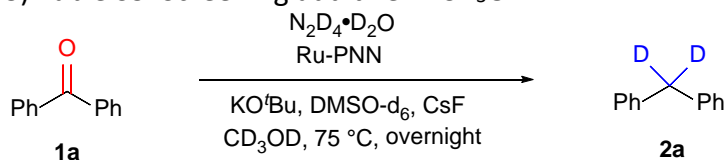

| entry | D <sub>2</sub> O (μl) | yield(%) <sup>b</sup> | %D <sup>c</sup> |
|-------|-----------------------|-----------------------|-----------------|
| 1     | 10                    | 67                    | 95              |
| 2     | 20                    | 63                    | 96              |
| 3     | 30                    | 75                    | 96              |

<sup>a</sup> **1a** (36.5 mg, 0.2 mmol, 1.0 equiv), N<sub>2</sub>D<sub>4</sub>·D<sub>2</sub>O (50 μL, 1.0 mmol, 5.0 equiv), dry CD<sub>3</sub>OD (0.2 mL), Ru-PNN (4.5 mg, 0.006 mmol, 3 mol%), KO<sup>t</sup>Bu (44.8 mg, 0.4 mmol, 2.0 equiv), additive: DMSO-d<sub>6</sub> (2.6 μL, 0.04 mmol, 20 mol%), CsF (15 mg, 0.1 mmol, 50 mol%), 75°C, overnight, under N<sub>2</sub>. <sup>b</sup> Yields were determined by crude <sup>1</sup>H NMR using mesitylene as an internal standard. <sup>c</sup> Deuterium contents were determined by crude <sup>2</sup>D NMR using CDCl<sub>3</sub> as an internal standard.

4) Table S4. Screening co-solvent with 4-hydroxybenzophenone<sup>a</sup>

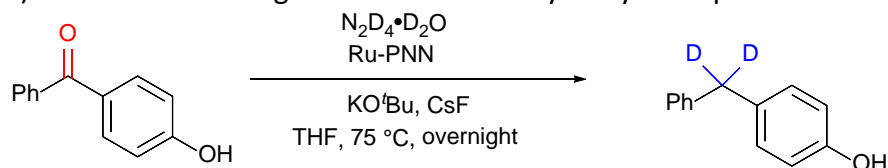

| entry | Co-solvent           | yield(%) <sup>b</sup> |
|-------|----------------------|-----------------------|
| 1     | d <sub>6</sub> -DMSO | 0                     |
| 2     | D <sub>2</sub> O     | 4                     |
| 3     | CD <sub>3</sub> OD   | 0                     |

<sup>a</sup> Ketone (39.6 mg, 0.2 mmol, 1.0 equiv), N<sub>2</sub>D<sub>4</sub>·D<sub>2</sub>O (50 μL, 1.0 mmol, 5.0 equiv), dry THF (0.1 mL), co-solvent (0.1 ml), Ru-PNN (4.5 mg, 0.006 mmol, 3 mol%), KO<sup>t</sup>Bu (44.8 mg, 0.4 mmol, 2.0 equiv), CsF (15 mg, 0.1 mmol, 50 mol%), 75°C, overnight, under N<sub>2</sub>. <sup>b</sup> Yields were determined by crude <sup>1</sup>H NMR using mesitylene as an internal standard.

### III. Other Substrates

Scheme S1. Substrates not tolerated<sup>a, b</sup>

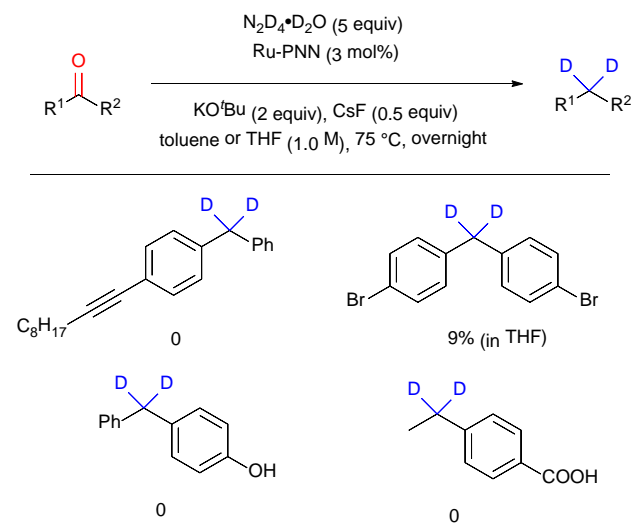

<sup>a</sup> **1** (0.2 mmol, 1.0 equiv), N<sub>2</sub>D<sub>4</sub>·D<sub>2</sub>O (50 μL, 1.0 mmol, 5.0 equiv), dry toluene or dry THF (0.2 mL), Ru-PNN (4.5 mg, 0.006 mmol, 3 mol%), KO<sup>t</sup>Bu (44.8 mg, 0.4 mmol, 2.0 equiv), additive: CsF (15 mg, 0.1 mmol, 50 mol%), 75°C, overnight, under N<sub>2</sub>. <sup>b</sup> Yields were determined by crude <sup>1</sup>H NMR using mesitylene as an internal standard.

Scheme S2. Substrates not tolerated for previous deoxygenation<sup>a</sup>

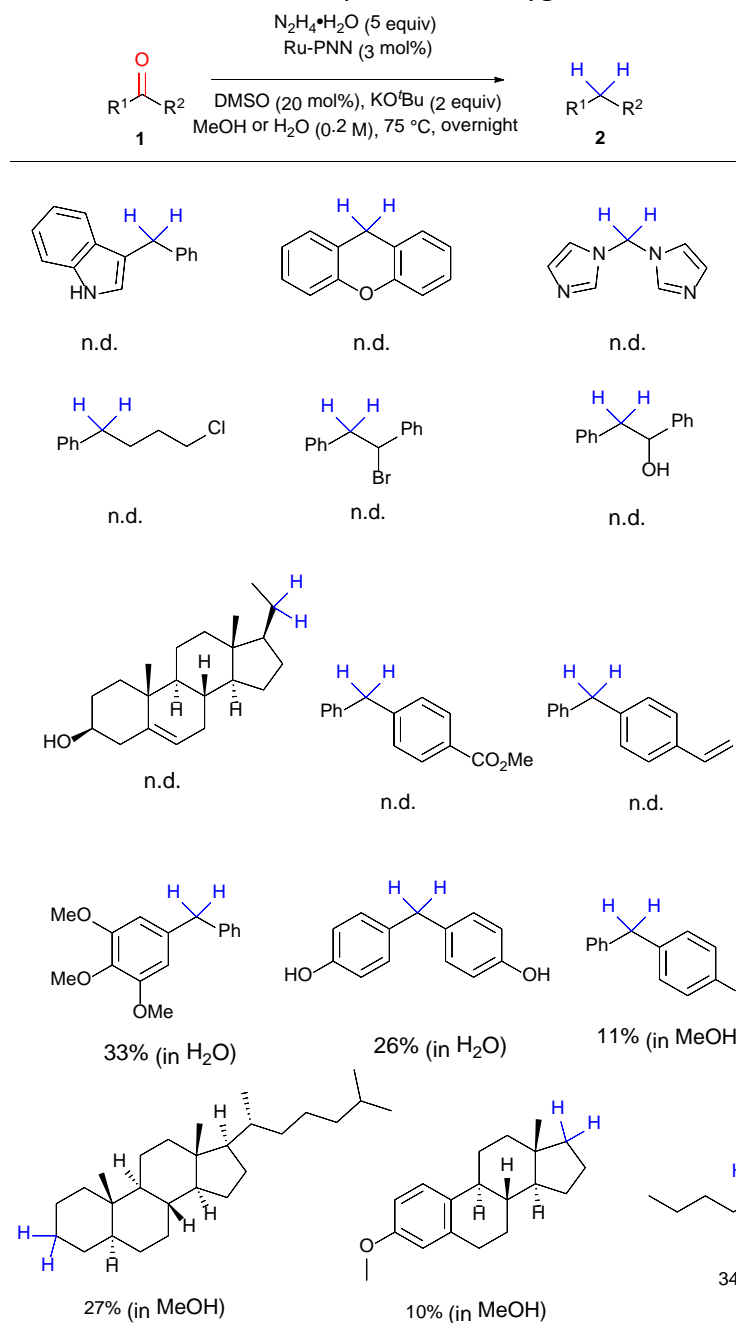

<sup>a</sup> **1** (0.2 mmol, 1.0 equiv), N<sub>2</sub>H<sub>4</sub>·H<sub>2</sub>O (50 μL, 1.0 mmol, 5.0 equiv), methanol or water (0.2 mL), Ru-PNN (4.5 mg, 0.006 mmol, 3 mol%), KO<sup>t</sup>Bu (44.8 mg, 0.4 mmol, 2.0 equiv), additive: DMSO (2.6 μL, 0.04 mmol, 20 mol%), 75 °C, overnight, under N<sub>2</sub>. <sup>b</sup> Yields were determined by crude <sup>1</sup>H NMR using mesitylene as an internal standard.

Scheme S3. Investigation of aldehyde<sup>a, b</sup>

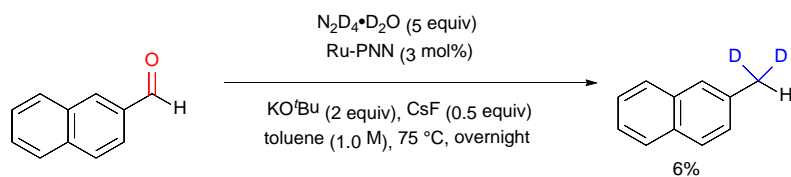

<sup>a</sup> Aldehyde (0.2 mmol, 1.0 equiv), N<sub>2</sub>D<sub>4</sub>·D<sub>2</sub>O (50 μL, 1.0 mmol, 5.0 equiv), dry toluene (0.2 mL), Ru-PNN (4.5 mg, 0.006 mmol, 3 mol%), KOtBu (44.8 mg, 0.4 mmol, 2.0 equiv), additive: CsF (15 mg, 0.1 mmol, 50 mol%), 75°C, overnight, under N<sub>2</sub>. <sup>b</sup> Yields were determined by crude <sup>1</sup>H NMR using mesitylene as an internal standard.

#### IV. General Procedure for the Deoxygenation of Ketones

A 10 mL V-shape frame-dry microwave vial with a magnetic stir-bar was transferred to glovebox and charged with Ru-PNN (4.5 mg, 0.006 mmol, 3 mol%), KOtBu (44.8 mg, 0.4 mmol, 2.0 equiv) ketone (0.2 mmol, 1.0 equiv), and CsF (15.0 mg, 0.1 mmol, 0.5 equiv). Dry toluene or THF was charged via a 1 mL plastic syringe, and deuterium hydrazine monohydrate (50 μL, 1.0 mmol, 5.0 equiv) was charged via Hamilton microliter syringe. The tube was sealed with an aluminum cap adapted with a septum and taken out from the glovebox. The tube was placed in a preheated oil bath at 75 °C and the mixture was stirred under an N<sub>2</sub> atmosphere overnight. The reaction mixture was cooled to room temperature, diluted with diethyl ether, filtered through anhydrous MgSO<sub>4</sub> followed by silica gel, concentrated, and charged with mesitylene (9.2 μL, 0.067 mmol, 0.33 equiv), DMSO-d<sub>6</sub> (14.1 μL, 0.2 mmol, 1.0 equiv). The <sup>1</sup>H and <sup>2</sup>D NMR data was taken, and the crude mixture was purified by column chromatography on silica gel under argon eluting with pentane: Et<sub>2</sub>O (10:1). The solvent was frozen in an ice-water bath and gently evacuated by vacuum to afford the products.

#### V. Characterization of Products

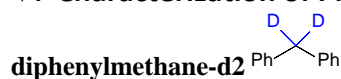

<sup>1</sup>H NMR (400 MHz, CDCl<sub>3</sub>) δ 7.34 – 7.24 (m, 5H), 7.24 – 7.16 (m, 5H). <sup>2</sup>D NMR (77 MHz, CDCl<sub>3</sub>) δ 3.98. <sup>13</sup>C NMR (201 MHz, CDCl<sub>3</sub>) δ 141.2, 129.1, 128.6, 126.2, 43.0 – 40.7 (m, J<sub>D-C</sub>=20.1 Hz). IR wavenumber (cm<sup>-1</sup>) 3082.6, 3059.3, 3024.3, 1509.7, 1493.2, 1447.1, 696.2. HRMS calc. for C<sub>13</sub>H<sub>10</sub>D [M-D]<sup>-</sup>: 168.0918; found, 168.0915.

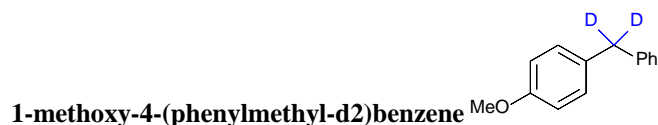

<sup>1</sup>H NMR (400 MHz, CDCl<sub>3</sub>) δ 7.36 – 7.27 (m, 2H), 7.23 – 7.14 (m, 3H), 7.14 – 7.07 (m, 2H), 6.87 – 6.80 (m, 2H), 3.78 (s, 3H). <sup>2</sup>D NMR (77 MHz, CDCl<sub>3</sub>) δ 3.91. <sup>13</sup>C NMR (201 MHz, CDCl<sub>3</sub>) δ 158.1, 141.7 (d, J<sub>D-C</sub> = 7.3 Hz), 133.4 (d, J<sub>D-C</sub> = 6.4 Hz), 130.0, 128.9, 128.6, 126.1, 114.0 (d, J<sub>D-C</sub> = 22.6 Hz), 55.4, 42.9 – 39.3 (m, J<sub>D-C</sub>=20.1 Hz). IR wavenumber (cm<sup>-1</sup>) 3059.1, 3024.7, 2999.9, 2952.7, 2931.7, 2904.5, 2833.6, 1493.0, 1472.1, 1294.3. HRMS calc. for C<sub>14</sub>H<sub>13</sub>D<sub>2</sub>O [M+H]<sup>+</sup>: 201.12430; found, 201.12379.

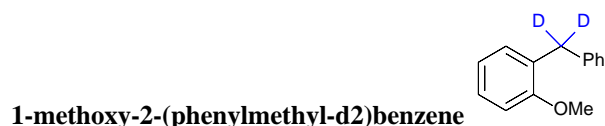

<sup>1</sup>H NMR (800 MHz, CDCl<sub>3</sub>) δ 7.32 – 7.25 (m, 2H), 7.22 – 7.16 (m, 3H), 7.14 – 7.05 (m, 2H), 6.86 – 6.80 (m, 2H), 3.78 (s, 3H). <sup>2</sup>D NMR (61 MHz, CDCl<sub>3</sub>) δ 3.92. <sup>13</sup>C NMR (201 MHz, CDCl<sub>3</sub>) δ 158.1, 141.7, 133.3, 130.0, 129.0, 128.6, 128.5, 126.1, 114.0, 113.9, 55.4, 41.2 – 40.2 (m, J<sub>D-C</sub>=20.1 Hz). IR wavenumber (cm<sup>-1</sup>) 3025.4, 2953.8, 2833.5, 1509.4, 1491.1, 1089.6, 1006.5. HRMS calc. for C<sub>14</sub>H<sub>13</sub>D<sub>2</sub>O [M+H]<sup>+</sup>: 201.12430; found, 201.12382.

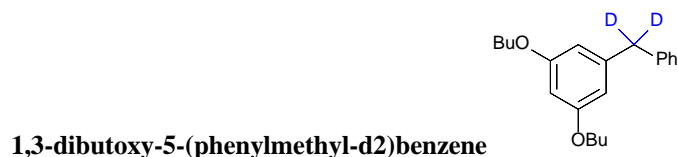

$^1\text{H}$  NMR (500 MHz,  $\text{CDCl}_3$ )  $\delta$  7.35 – 7.09 (m, 5H), 6.96 (d,  $J = 8.2$  Hz, 1H), 6.44 (d,  $J = 2.4$  Hz, 1H), 6.39 (dd,  $J = 8.2, 2.4$  Hz, 1H), 3.92 (dt,  $J = 7.5, 6.5$  Hz, 4H), 1.82 – 1.63 (m, 4H), 1.54 – 1.35 (m, 4H), 0.95 (dt,  $J = 17.5, 7.4$  Hz, 6H).  $^{13}\text{C}$  NMR (201 MHz,  $\text{CDCl}_3$ )  $\delta$  159.0, 157.8, 141.8, 130.6, 129.0, 128.3, 125.7, 122.2, 104.6, 99.9, 67.9, 67.7, 35.7 – 34.6 (m,  $J_{\text{D-C}}=20.1$  Hz), 31.6, 31.5, 19.4, 14.0, 14.0.  $^2\text{D}$  NMR (61 MHz,  $\text{CDCl}_3$ )  $\delta$  3.88. IR wavenumber ( $\text{cm}^{-1}$ ) 3024.3, 2957.4, 2932.2, 2870.5, 1643.2, 1610.3, 1503.9, 1173.3, 1126.8. HRMS calc. for  $\text{C}_{21}\text{H}_{27}\text{D}_2\text{O}_2$   $[\text{M}+\text{H}]^+$ : 315.2288; found, 315.2280.

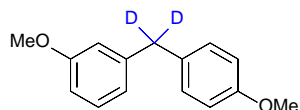

**1-methoxy-3-((4-methoxyphenyl)methyl-d2)benzene**

$^1\text{H}$  NMR (400 MHz,  $\text{CDCl}_3$ )  $\delta$  7.20 (td,  $J = 7.7, 0.8$  Hz, 1H), 7.15 – 7.07 (m, 2H), 6.87 – 6.80 (m, 2H), 6.80 – 6.69 (m, 3H), 3.78 (s, 3H), 3.77 (s, 3H).  $^2\text{D}$  NMR (61 MHz,  $\text{CDCl}_3$ )  $\delta$  3.88.  $^{13}\text{C}$  NMR (201 MHz,  $\text{CDCl}_3$ )  $\delta$  159.8, 158.1, 143.3, 133.1, 130.0, 129.5, 121.4, 114.8, 114.0, 111.4, 55.4, 55.3, 40.3 – 41.0 (m,  $J_{\text{D-C}}=20.1$  Hz). IR wavenumber ( $\text{cm}^{-1}$ ) 3025.5, 2999.0, 2954.8, 2905.6, 2833.5, 1509.6, 1486.0, 1243.4, 1007.9. HRMS calc. for  $\text{C}_{15}\text{H}_{14}\text{D}_2\text{O}_2$   $[\text{M}]^+$ : 230.1270; found, 230.1277.

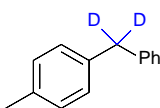

**1-methyl-4-(phenylmethyl-d2)benzene** (with deuterium at p-methyl group)

$^1\text{H}$  NMR (400 MHz,  $\text{CDCl}_3$ )  $\delta$  7.32 – 7.25 (m, 2H), 7.19 (ddt,  $J = 7.0, 3.4, 1.5$  Hz, 3H), 7.10 (d,  $J = 0.9$  Hz, 4H), 2.32 (s, 3H),  $[-\text{CH}_2\text{D}, -\text{CHD}_2: 2.32 - 2.30$  (m, 1H), 2.29 (q,  $J = 2.2$  Hz, 0H)].  $^2\text{D}$  NMR (61 MHz,  $\text{CDCl}_3$ )  $\delta$  3.94,  $[-\text{CH}_2\text{D}, -\text{CHD}_2, -\text{CD}_3: 2.37, 2.34, 2.30]$ .  $^{13}\text{C}$  NMR (201 MHz,  $\text{CDCl}_3$ )  $\delta$  141.5, 138.2, 135.7, 129.3, 129.0, 128.9, 128.6, 126.1, 41.9 – 40.6 (m,  $J_{\text{D-C}}=20.1$  Hz), 21.2, [substrates with deuterium at p-methyl group: 141.5, 138.2, 135.7 – 135.6 (m), 21.0 – 20.3 (m)]. IR wavenumber ( $\text{cm}^{-1}$ ) 3022.5, 2921.1, 1512.1, 1492.8, 1008.4. HRMS calc. for  $\text{C}_{14}\text{H}_{12}\text{D}_2$   $[\text{M}]^+$ : 184.1216; found, 184.1211. [HRMS calc. for  $\text{C}_{14}\text{H}_{11}\text{D}_3$   $[\text{M}]^+$ : 185.1278; found, 185.1276.]

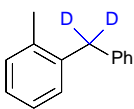

**1-methyl-2-(phenylmethyl-d2)benzene** (with deuterium at o-methyl group)

$^1\text{H}$  NMR (400 MHz,  $\text{CDCl}_3$ )  $\delta$  7.33 – 7.24 (m, 2H), 7.22 – 7.08 (m, 7H), 2.25 (s, 3H),  $[-\text{CH}_2\text{D}, -\text{CHD}_2: 2.24 - 2.22$  (m, 0H)].  $^2\text{D}$  NMR (61 MHz,  $\text{CDCl}_3$ )  $\delta$  3.98,  $[-\text{CH}_2\text{D}, -\text{CHD}_2, -\text{CD}_3: 2.30, 2.27, 2.23]$ .  $^{13}\text{C}$  NMR (201 MHz,  $\text{CDCl}_3$ )  $\delta$  140.5, 139.0, 136.8, 130.4, 130.1, 128.9, 128.5, 126.6, 126.1, 126.1, 39.5 – 38.7 (m,  $J_{\text{D-C}}=20.1$  Hz), 19.8, [substrates with deuterium at o-methyl group: 140.5, 139.0, 136.7, 19.7 – 19.4 (m)]. IR wavenumber ( $\text{cm}^{-1}$ ) 3059.1, 3023.6, 2952.1, 2833.4, 1509.8, 1491.7, 1090.0, 1031.9. HRMS calc. for  $\text{C}_{14}\text{H}_{12}\text{D}_2$   $[\text{M}]^+$ : 184.1216; found, 184.1202. [HRMS calc. for  $\text{C}_{14}\text{H}_{11}\text{D}_3$   $[\text{M}]^+$ : 185.1278; found, 185.1268.]

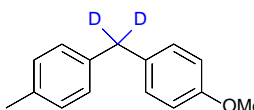

**1-methoxy-4-(p-tolylmethyl-d2)benzene** (with deuterium at p-methyl group)

$^1\text{H}$  NMR (400 MHz,  $\text{CDCl}_3$ )  $\delta$  7.15 – 7.04 (m, 6H), 6.87 – 6.79 (m, 2H), 3.79 (s, 3H), 2.32 (s, 3H),  $[-\text{CH}_2\text{D}, -\text{CHD}_2: 2.30$  (dt,  $J = 6.5, 2.2$  Hz, 1H)].  $^2\text{D}$  NMR (61 MHz,  $\text{CDCl}_3$ )  $\delta$  3.88,  $[-\text{CH}_2\text{D}, -\text{CHD}_2, -\text{CD}_3: 2.37, 2.33, 2.30]$ .  $^{13}\text{C}$  NMR (201 MHz,  $\text{CDCl}_3$ )  $\delta$  158.0, 138.6, 135.6, 133.6, 129.9, 129.3, 128.8, 114.0, 55.4, 40.5 – 40.0 (m,  $J_{\text{D-C}}=20.1$  Hz), 21.1 [substrates with deuterium at p-methyl group: 138.7, 135.5 – 135.5 (m), 133.7, 21.0 – 20.1 (m)]. IR wavenumber ( $\text{cm}^{-1}$ ) 2998.8, 2952.6, 2905.6, 2833.7, 1509.1, 1242.5, 1111.3, 1036.1. HRMS calc. for  $\text{C}_{15}\text{H}_{14}\text{D}_2\text{O}$   $[\text{M}]^+$ : 214.1321; found, 214.1313. [HRMS calc. for  $\text{C}_{15}\text{H}_{13}\text{D}_3\text{O}$   $[\text{M}]^+$ : 215.1384; found, 215.1378.]

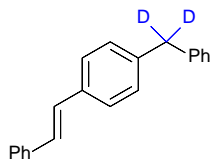

**(E)-1-(phenylmethyl-d2)-4-styrylbenzene**

$^1\text{H}$  NMR (400 MHz,  $\text{CDCl}_3$ )  $\delta$  7.53 – 7.47 (m, 2H), 7.47 – 7.41 (m, 2H), 7.35 (t,  $J$  = 7.7 Hz, 2H), 7.32 – 7.24 (m, 3H), 7.24 – 7.17 (m, 5H), 7.07 (d,  $J$  = 1.6 Hz, 2H).  $^2\text{D}$  NMR (61 MHz,  $\text{CDCl}_3$ )  $\delta$  3.98.  $^{13}\text{C}$  NMR (201 MHz,  $\text{CDCl}_3$ )  $\delta$  141.1, 140.8, 137.6, 135.4, 129.4, 129.0, 128.8, 128.7, 128.6, 128.3, 127.6, 126.8, 126.6, 126.3. IR wavenumber ( $\text{cm}^{-1}$ ) 3078.7, 3051.0, 3021.2, 1509.4, 1491.8, 1447.2, 960.2, 945.1. HRMS calc. for  $\text{C}_{21}\text{H}_{17}\text{D}_2$   $[\text{M}+\text{H}]^+$ : 273.1607; found, 273.1620.

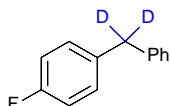

**1-fluoro-4-(phenylmethyl-d2)benzene**

$^1\text{H}$  NMR (800 MHz,  $\text{CDCl}_3$ )  $\delta$  7.25 – 7.20 (m, 2H), 7.16 – 7.12 (m, 1H), 7.11 – 7.08 (m, 2H), 7.07 – 6.97 (m, 2H), 6.91 – 6.88 (m, 2H).  $^2\text{D}$  NMR (61 MHz,  $\text{CDCl}_3$ )  $\delta$  3.95.  $^{13}\text{C}$  NMR (201 MHz,  $\text{CDCl}_3$ )  $\delta$  161.6 (d,  $J_{\text{C-F}}$  = 244.0 Hz), 141.0 (d,  $J_{\text{C-F}}$  = 7.1 Hz), 136.8, 130.4 (d,  $J_{\text{C-F}}$  = 7.8 Hz), 129.0, 128.7, 126.4, 115.4 (d,  $J_{\text{C-F}}$  = 21.3 Hz), 41.2 – 40.3 (m,  $J_{\text{D-C}}$  = 20.1 Hz).  $^{19}\text{F}$  NMR (471 MHz,  $\text{CDCl}_3$ )  $\delta$  -117.42. IR wavenumber ( $\text{cm}^{-1}$ ) 2955.2, 2927.0, 2856.3, 1082.80, 1032.2. HRMS calc. for  $\text{C}_{13}\text{H}_9\text{DF}$   $[\text{M-D}]^-$ : 186.08238; found, 186.08229.

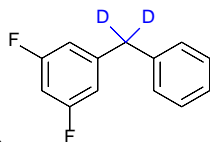

**1,3-difluoro-5-(phenylmethyl-d2)benzene**

$^1\text{H}$  NMR (400 MHz,  $\text{CDCl}_3$ )  $\delta$  7.38 – 7.30 (m, 3H), 7.29 – 7.23 (m, 1H), 7.22 – 7.16 (m, 2H), 6.79 – 6.68 (m, 2H).  $^2\text{D}$  NMR (77 MHz,  $\text{CDCl}_3$ )  $\delta$  3.94.  $^{13}\text{C}$  NMR (201 MHz,  $\text{CDCl}_3$ )  $\delta$  163.2 (dd,  $J_{\text{C-F}}$  = 248.2, 12.9 Hz), 145.1 (t,  $J_{\text{C-F}}$  = 8.4 Hz), 139.5, 129.1, 128.9, 126.8, 111.8 (dd,  $J_{\text{C-F}}$  = 20.4, 4.3 Hz), 102.1 – 101.1 (m), 42.3 – 40.7 (m,  $J_{\text{D-C}}$  = 20.1 Hz).  $^{19}\text{F}$  NMR (471 MHz,  $\text{CDCl}_3$ )  $\delta$  -110.39, -110.66. IR wavenumber ( $\text{cm}^{-1}$ ) 2955.3, 2928.9, 2857.0, 1082.0, 1032.1. HRMS calc. for  $\text{C}_{13}\text{H}_8\text{D}_2\text{F}_2$   $[\text{M}]^+$ : 206.0871; found, 206.0864.

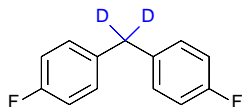

**bis(4-fluorophenyl)methane-d2**

$^1\text{H}$  NMR (500 MHz,  $\text{CDCl}_3$ )  $\delta$  7.11 (dd,  $J$  = 8.5, 5.3 Hz, 4H), 7.03 – 6.89 (m, 4H).  $^2\text{D}$  NMR (77 MHz,  $\text{CDCl}_3$ )  $\delta$  3.90.  $^{19}\text{F}$  NMR (471 MHz,  $\text{CDCl}_3$ )  $\delta$  -117.15.  $^{13}\text{C}$  NMR (201 MHz,  $\text{CDCl}_3$ )  $\delta$  161.63 (d,  $J_{\text{C-F}}$  = 244.3 Hz), 136.67, 130.33 (d,  $J_{\text{C-F}}$  = 7.9 Hz), 115.45 (d,  $J_{\text{C-F}}$  = 21.3 Hz), 40.6 – 39.9 (m,  $J_{\text{D-C}}$  = 20.1 Hz). IR wavenumber ( $\text{cm}^{-1}$ ) 3050.7, 3021.7, 1507.6, 1492.3. HRMS calc. for  $\text{C}_{13}\text{H}_7\text{D}_2\text{F}_2$   $[\text{M-H}]^-$ : 205.0792; found, 205.0795.

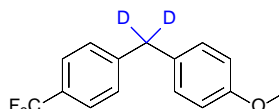

**1-methoxy-4-((4-(trifluoromethyl)phenyl)methyl-d2)benzene**

$^1\text{H}$  NMR (400 MHz,  $\text{CDCl}_3$ )  $\delta$  7.53 (d,  $J$  = 8.0 Hz, 2H), 7.27 (d,  $J$  = 11.7 Hz, 2H), 7.14 – 7.04 (m, 2H), 6.84 (d,  $J$  = 8.6 Hz, 2H), 3.79 (s, 3H).  $^2\text{D}$  NMR (61 MHz,  $\text{CDCl}_3$ )  $\delta$  4.04.  $^{19}\text{F}$  NMR (376 MHz,  $\text{CDCl}_3$ )  $\delta$  -62.36.  $^{13}\text{C}$  NMR (201 MHz,  $\text{CDCl}_3$ )  $\delta$  158.4, 145.8, 132.2, 130.0, 129.2, 128.6, 128.5, 125.5 (q,  $J_{\text{C-F}}$  = 3.7 Hz), 114.2, 55.4, 41.2 – 40.2 (m,



$J_{D-C}=20.1$  Hz). IR wavenumber ( $\text{cm}^{-1}$ ) 3059.7, 3025.6, 1264.4, 1246.0. HRMS calc. for  $\text{C}_{15}\text{H}_{11}\text{D}_2\text{F}_3\text{O}$   $[\text{M}]^+$ : 268.1039; found, 268.1049.

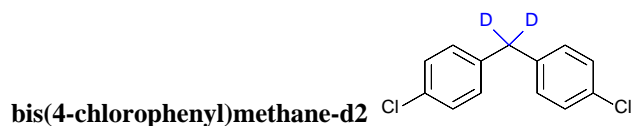

$^1\text{H}$  NMR (800 MHz,  $\text{CDCl}_3$ )  $\delta$  7.26 (d,  $J = 8.2$  Hz, 4H), 7.09 (d,  $J = 8.5$  Hz, 4H).  $^2\text{D}$  NMR (61 MHz,  $\text{CDCl}_3$ )  $\delta$  3.90.  $^{13}\text{C}$  NMR (201 MHz,  $\text{CDCl}_3$ )  $\delta$  139.1, 132.3, 130.3, 128.8, 40.7 – 39.7 (m,  $J_{D-C}=20.1$  Hz). IR wavenumber ( $\text{cm}^{-1}$ ) 3026.9, 2925.9, 1489.5, 1088.8, 1006.6. HRMS calc. for  $\text{C}_{13}\text{H}_8\text{DCl}_2$   $[\text{M-D}]^-$ : 236.01386; found, 236.01342.

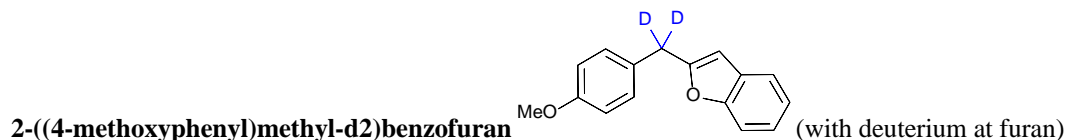

$^1\text{H}$  NMR (500 MHz,  $\text{CDCl}_3$ )  $\delta$  7.62 – 7.37 (m, 2H), 7.33 – 7.09 (m, 4H), 6.87 (d,  $J = 8.7$  Hz, 2H), 6.35 (s, 1H), 3.80 (s, 3H).  $^2\text{D}$  NMR (77 MHz,  $\text{CDCl}_3$ )  $\delta$  4.03.  $^{13}\text{C}$  NMR (201 MHz,  $\text{CDCl}_3$ )  $\delta$  158.5, 155.0, 129.9, 129.2, 128.8, 128.8, 123.3, 122.5, 120.4, 114.0, 110.9, 103.1, 55.3, 30.2 – 29.7 (m,  $J_{D-C}=20.1$  Hz). IR wavenumber ( $\text{cm}^{-1}$ ) 2954.1, 2926.1, 2835.8, 1508.9, 1453.3, 1235.6, 1174.4. HRMS calc. for  $\text{C}_{16}\text{H}_{13}\text{D}_2\text{O}_2$   $[\text{M+H}]^+$ : 241.1192; found, 241.1185.

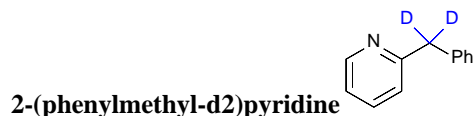

$^1\text{H}$  NMR (500 MHz,  $\text{CDCl}_3$ )  $\delta$  8.54 (dd,  $J = 5.3, 2.1$  Hz, 1H), 7.56 (td,  $J = 7.7, 1.9$  Hz, 1H), 7.38 – 7.24 (m, 4H), 7.24 – 7.14 (m, 1H), 7.14 – 6.98 (m, 2H).  $^2\text{D}$  NMR (61 MHz,  $\text{CDCl}_3$ )  $\delta$  4.15.  $^{13}\text{C}$  NMR (201 MHz,  $\text{CDCl}_3$ )  $\delta$  161.1, 149.5, 139.6, 136.7, 129.2, 128.7, 126.5, 123.2, 121.4, 44.9 – 43.8 (m,  $J_{D-C}=20.1$  Hz). IR wavenumber ( $\text{cm}^{-1}$ ) 2959.1, 2869.8, 1090.5, 635.7. HRMS calc. for  $\text{C}_{12}\text{H}_{10}\text{D}_2\text{N}$   $[\text{M+H}]^+$ : 172.10898; found, 172.10857.

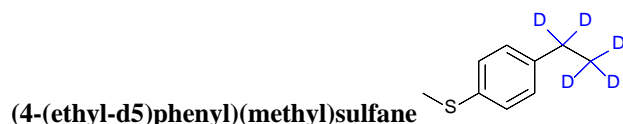

$^1\text{H}$  NMR (400 MHz,  $\text{CDCl}_3$ )  $\delta$  7.25 – 7.17 (m, 2H), 7.16 – 7.09 (m, 2H), 2.47 (s, 3H).  $^2\text{D}$  NMR (61 MHz,  $\text{CDCl}_3$ )  $\delta$  2.57, 1.18.  $^{13}\text{C}$  NMR (201 MHz,  $\text{CDCl}_3$ )  $\delta$  141.6, 135.1, 128.6, 127.5, 30.5, 16.6. IR wavenumber ( $\text{cm}^{-1}$ ) 2955.5, 2928.7, 2856.8, 1081.6. HRMS calc. for  $\text{C}_9\text{H}_6\text{D}_5\text{S}$   $[\text{M-H}]^-$ : 156.0890; found, 156.0888.

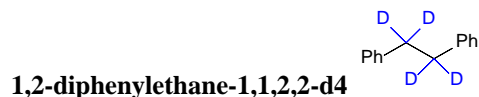

$^1\text{H}$  NMR (500 MHz,  $\text{CDCl}_3$ )  $\delta$  7.32 – 7.25 (m, 5H), 7.23 – 7.10 (m, 5H).  $^2\text{D}$  NMR (61 MHz,  $\text{CDCl}_3$ )  $\delta$  2.90.  $^{13}\text{C}$  NMR (201 MHz,  $\text{CDCl}_3$ )  $\delta$  141.9, 128.6, 128.5, 126.1, 37.9 – 37.4 (m,  $J_{D-C}=20.1$  Hz). IR wavenumber ( $\text{cm}^{-1}$ ) 1084.6, 1006.2. HRMS calc. for  $\text{C}_9\text{H}_6\text{D}_5\text{S}$   $[\text{M-H}]^-$ : 156.0890; found, 156.0888. HRMS calc. for  $\text{C}_{14}\text{H}_{10}\text{D}_3$   $[\text{M-D}]^-$ : 184.1200; found, 184.1198.

## VI. References

1. G. Facey, *Finding "Lost" Deuterated  $^{13}\text{C}$  Signals*.

## VII. Copies of IR, HRMS, $^1\text{H}$ NMR, $^2\text{D}$ NMR, $^{13}\text{C}$ NMR, and $^{19}\text{F}$ NMR

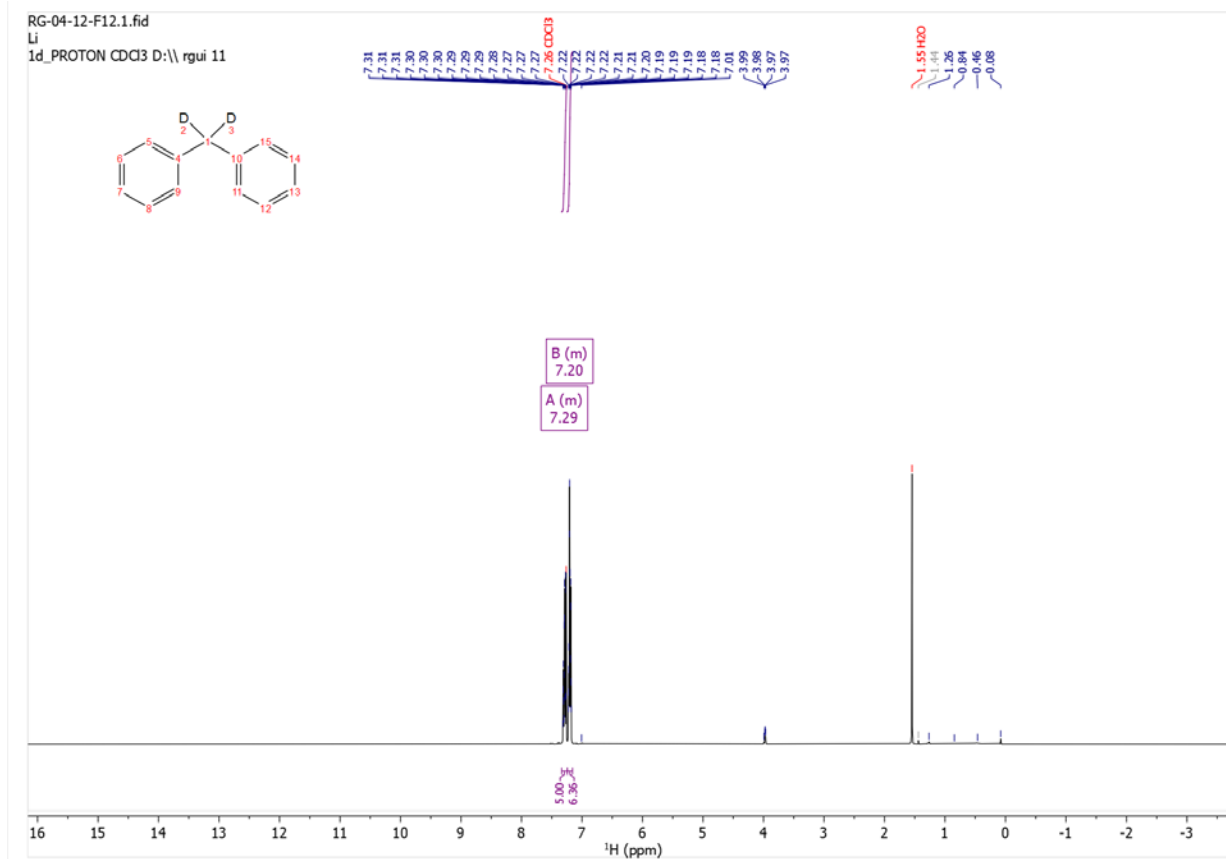

RG-04-12-F4.1.fid  
Li  
1d\_DEUTERIUM CDCl3 D:\rgui 11

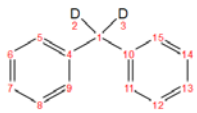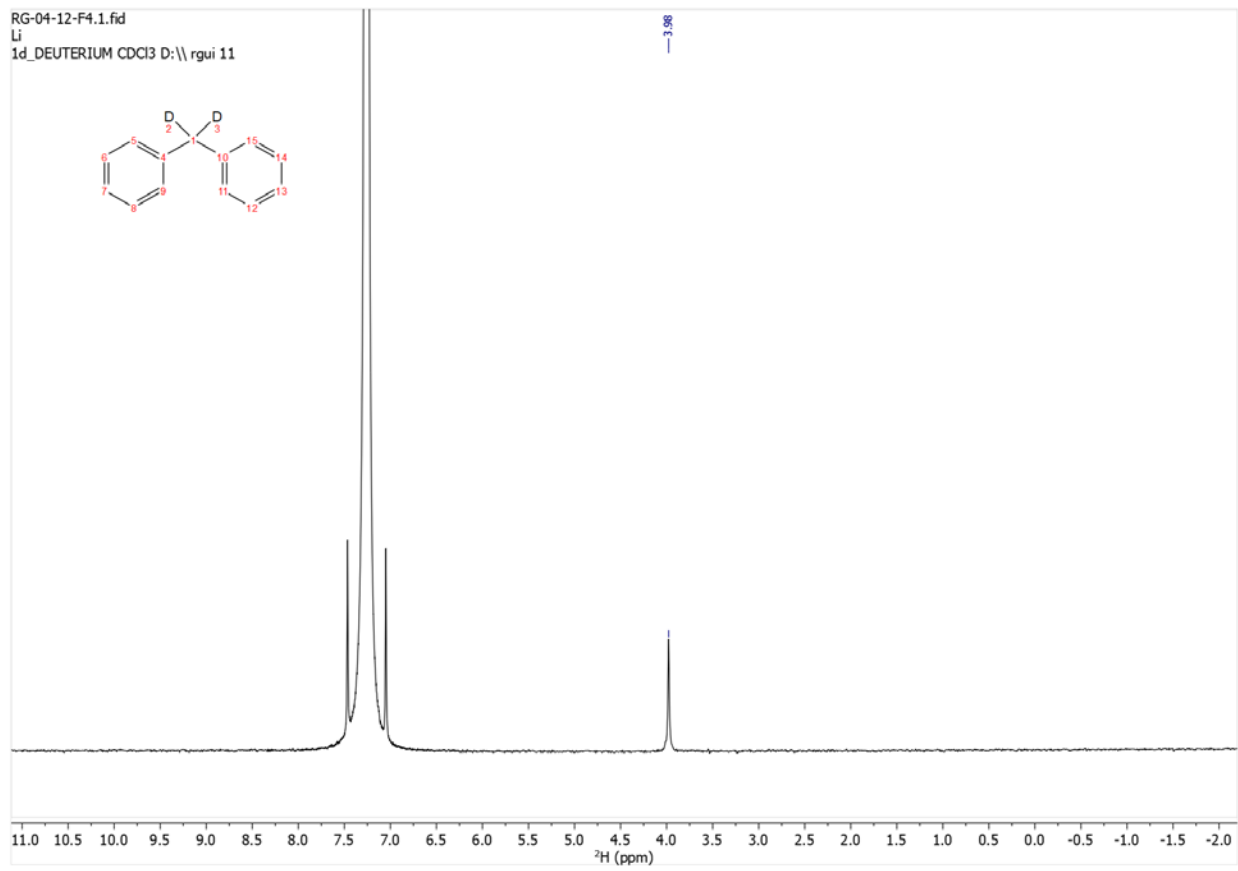

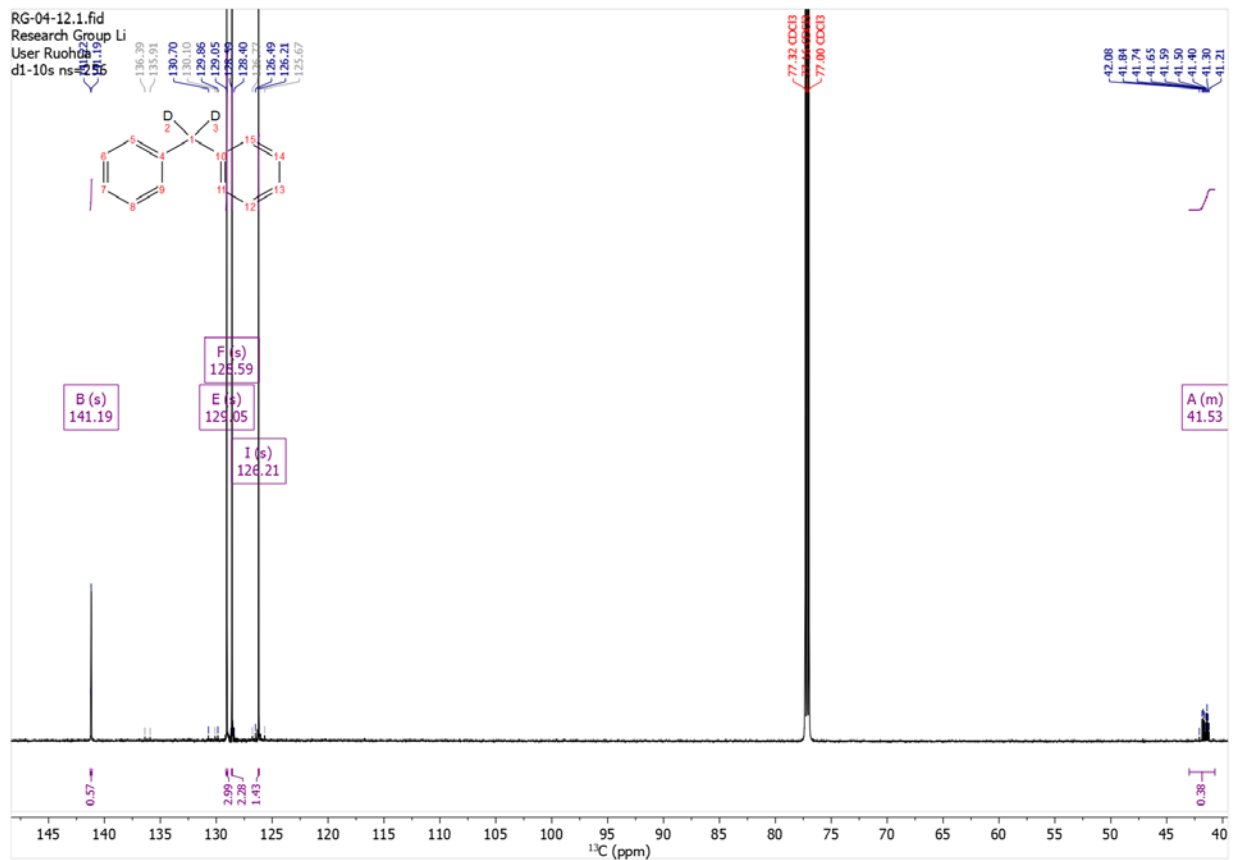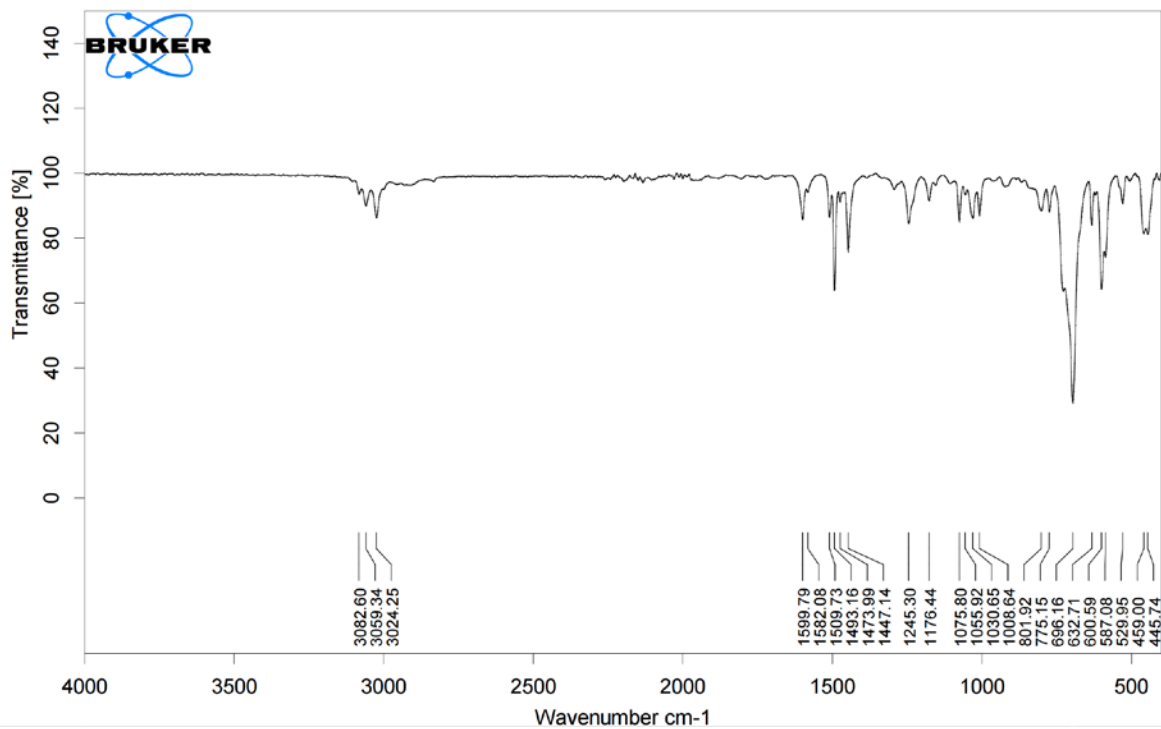

# Mass Spectrum SmartFormula Report

**Analysis Info**

Analysis Name D:\Data\Li\2022-09-13 Li-Gui RG-04-12 APCI +ve.d  
 Method APCI\_Tune\_pos\_Low\_AW Small.m  
 Sample Name 2022-09-13 Li-Gui RG-04-12 APCI +ve  
 Comment

Acquisition Date 9/13/2022 3:06:06 PM  
 Operator Alex  
 Instrument maXis impact 282001.00044

**Acquisition Parameter**

|             |            |                      |          |                  |           |
|-------------|------------|----------------------|----------|------------------|-----------|
| Source Type | APCI       | Ion Polarity         | Positive | Set Nebulizer    | 4.0 Bar   |
| Focus       | Not active | Set Capillary        | 4000 V   | Set Dry Heater   | 150 °C    |
| Scan Begin  | 90 m/z     | Set End Plate Offset | -500 V   | Set Dry Gas      | 1.5 l/min |
| Scan End    | 1250 m/z   | Set Charging Voltage | 2000 V   | Set Divert Valve | Source    |
|             |            | Set Corona           | 4000 nA  | Set APCI Heater  | 450 °C    |

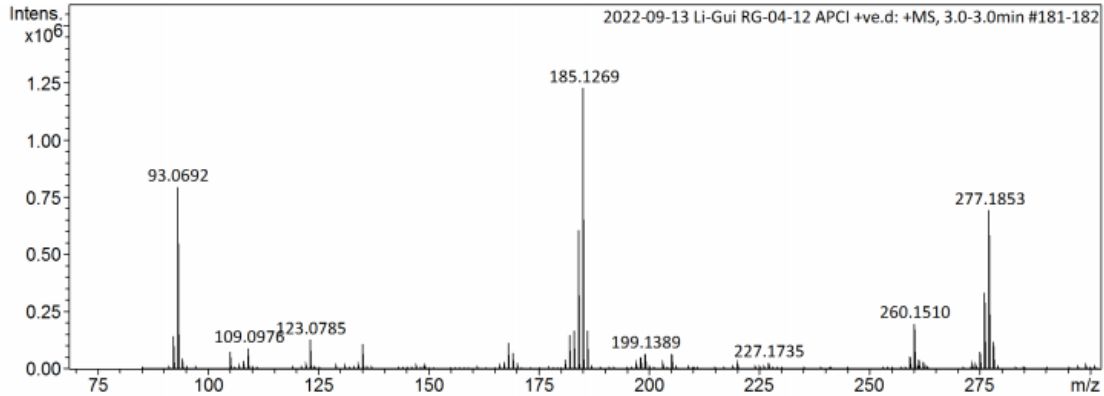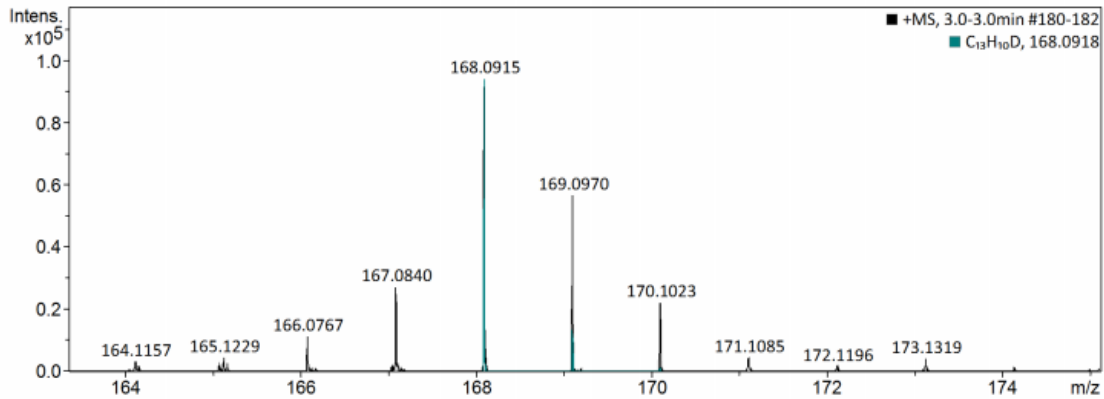

| Meas. m/z | # | Ion Formula                                                   | m/z      | err [ppm] | mSigma | # mSigma | Score  | rdb | e <sup>-</sup> Conf | N-Rule |
|-----------|---|---------------------------------------------------------------|----------|-----------|--------|----------|--------|-----|---------------------|--------|
| 168.0915  | 1 | C <sub>13</sub> H <sub>10</sub> D                             | 168.0918 | 1.9       | 295.7  | 1        | 100.00 | 8.5 | even                | ok     |
|           | 2 | C <sub>13</sub> H <sub>8</sub> D <sub>2</sub>                 | 168.0903 | -7.3      | 295.9  | 2        | 60.41  | 9.0 | odd                 | ok     |
| 169.0970  | 1 | C <sub>13</sub> H <sub>9</sub> D <sub>2</sub>                 | 169.0981 | 6.1       | 148.1  | 1        | 100.00 | 8.5 | even                | ok     |
|           | 2 | C <sub>8</sub> H <sub>13</sub> N <sub>2</sub> O <sub>2</sub>  | 169.0972 | 0.6       | 173.8  | 2        | 26.40  | 3.5 | even                | ok     |
|           | 3 | C <sub>8</sub> H <sub>11</sub> DN <sub>2</sub> O <sub>2</sub> | 169.0956 | -8.5      | 173.9  | 3        | 12.83  | 4.0 | odd                 | ok     |
|           | 4 | C <sub>6</sub> H <sub>11</sub> N <sub>5</sub> O               | 169.0958 | -7.3      | 180.5  | 4        | 8.86   | 4.0 | odd                 | ok     |
| 170.1023  | 1 | C <sub>13</sub> H <sub>14</sub>                               | 170.1090 | 39.6      | 31.4   | 1        | 0.20   | 7.0 | odd                 | ok     |
|           | 2 | C <sub>13</sub> H <sub>12</sub> D                             | 170.1075 | 30.5      | 31.5   | 2        | 2.43   | 7.5 | even                | ok     |
|           | 3 | C <sub>13</sub> H <sub>10</sub> D <sub>2</sub>                | 170.1059 | 21.4      | 31.6   | 3        | 17.54  | 8.0 | odd                 | ok     |
|           | 4 | C <sub>12</sub> H <sub>12</sub> N                             | 170.0964 | -34.4     | 35.5   | 4        | 0.79   | 7.5 | even                | ok     |

RG-04-129B-F3\_PROTON\_01  
RG-04-129B-F3

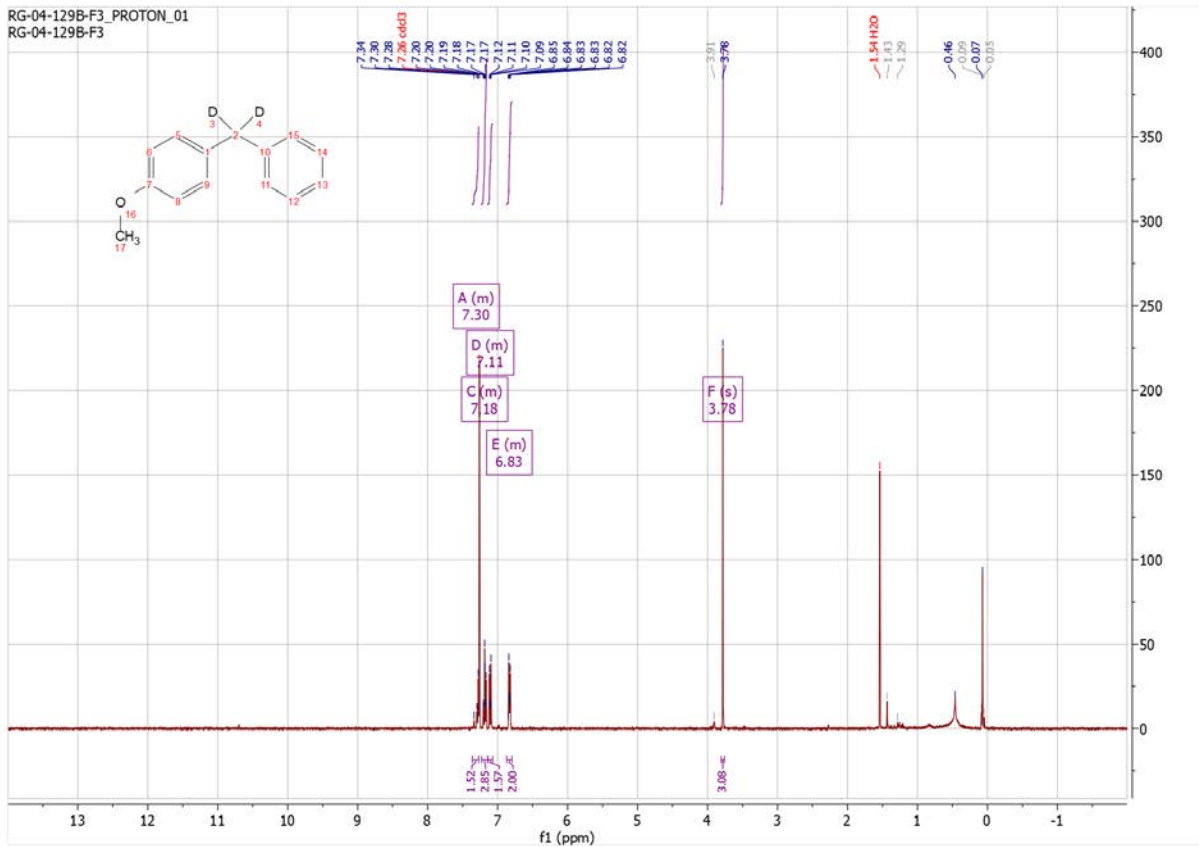

RG-04-129B-F3.1.fid  
Li  
1d\_DEUTERIUM CDCl3 D:\rgui 17

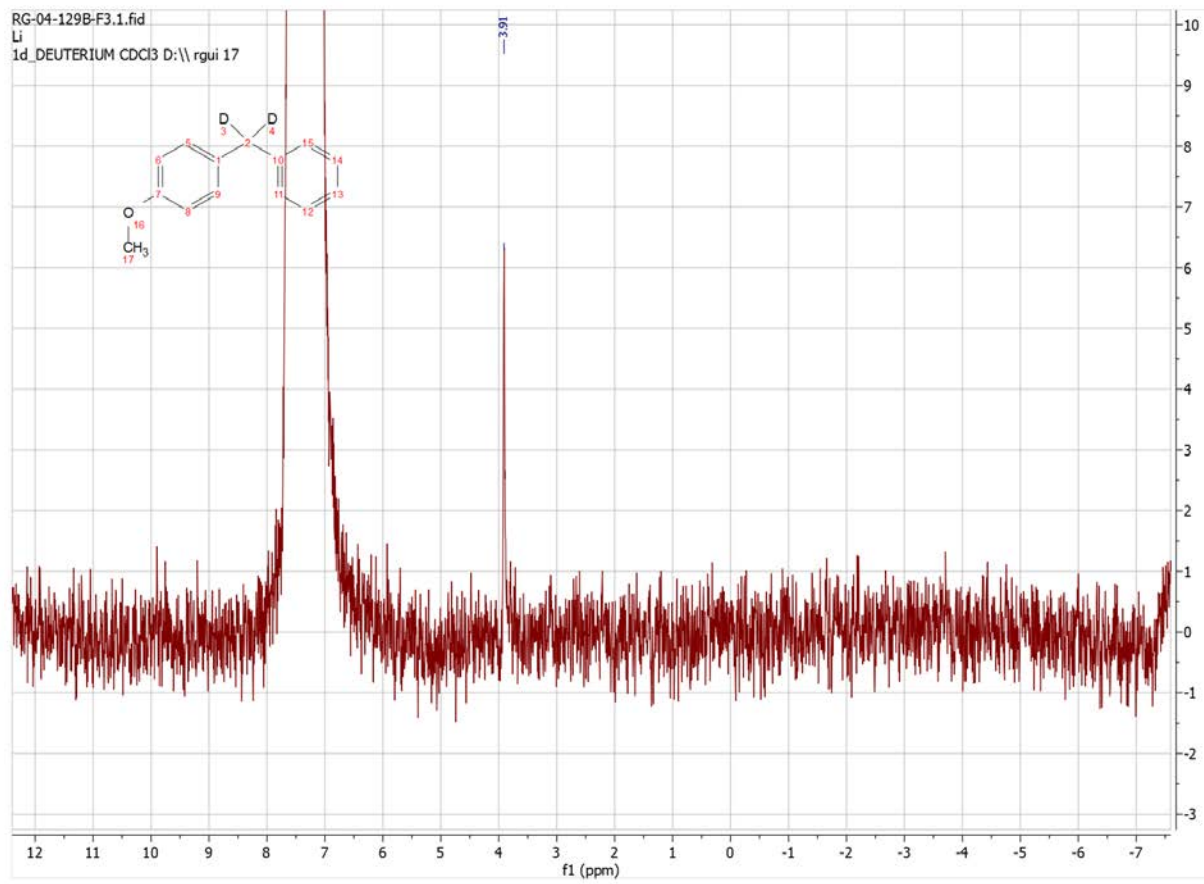





221215-01cAPCI- HRMSinf-Li-R Gui-RG-04-129B\_221215120115 #303-328 RT: 0.70-0.76 AV: 26 NL: 1.73E8  
T: FTMS + p APCI corona Full ms [150.0000-500.0000]

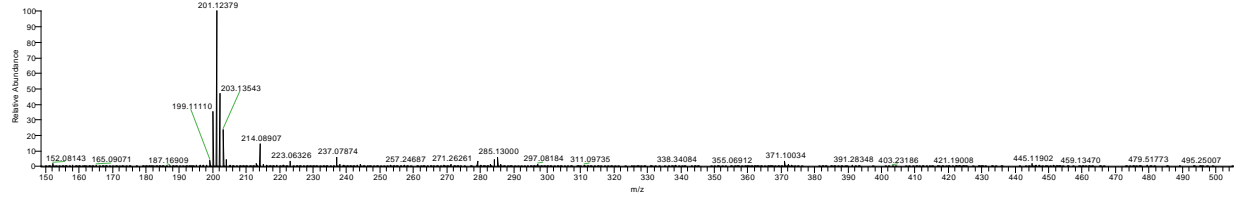

221215-01cAPCI- HRMSinf-Li-R Gui-RG-04-129B\_221215120115 #303-328 RT: 0.70-0.76 AV: 26 NL: 1.73E8  
T: FTMS + p APCI corona Full ms [150.0000-500.0000]

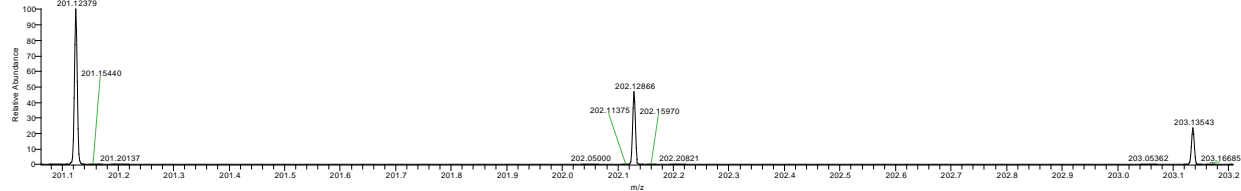

221215-01cAPCI- HRMSinf-Li-R Gui-RG-04-129B\_221215120115#303-328 RT: 0.70-0.76 AV: 26

T: FTMS + p APCI corona Full ms [150.0000-500.0000]

m/z = 201.11734-201.13722

| m/z       | Intensity   | Relative | Resolution | Charge | Theo. Mass | Delta (ppm) | RDB equiv. | Composition                                       |
|-----------|-------------|----------|------------|--------|------------|-------------|------------|---------------------------------------------------|
| 201.12379 | 173290032.0 | 100.00   | 38032.23   | 1.00   | 201.12430  | -2.52       | 7.5        | C <sub>14</sub> H <sub>13</sub> ²H <sub>2</sub> O |

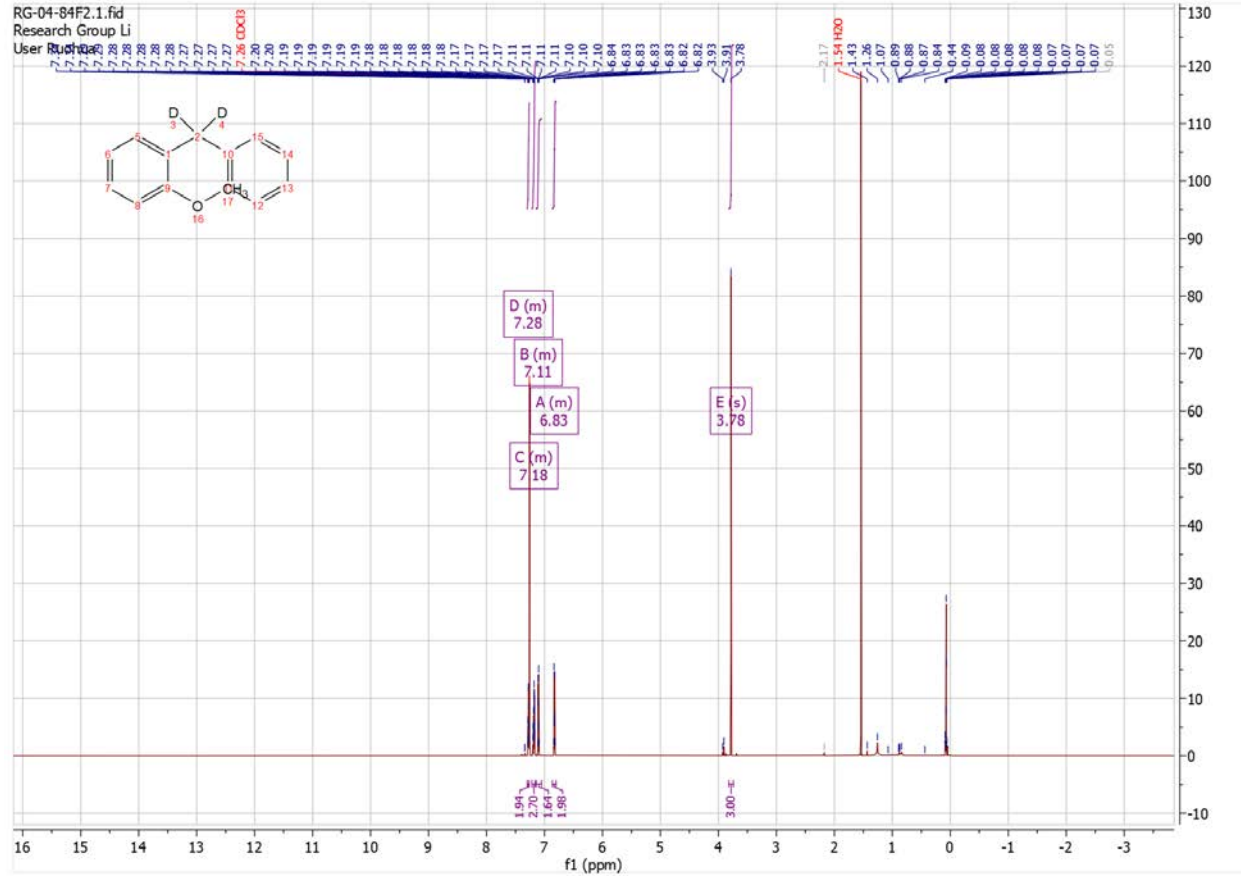

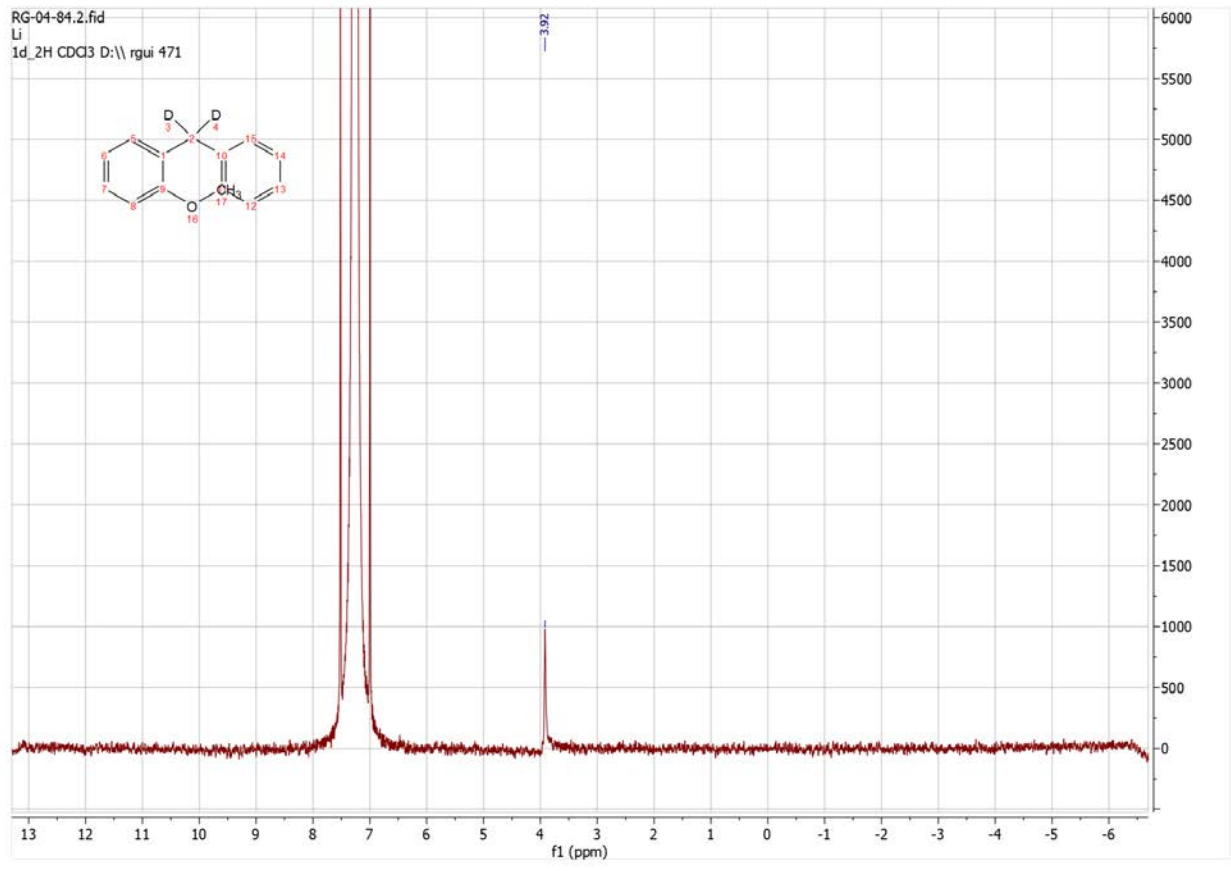

RG-04-84F2.3.fid  
 Research Group Lumb  
 User Ruohua

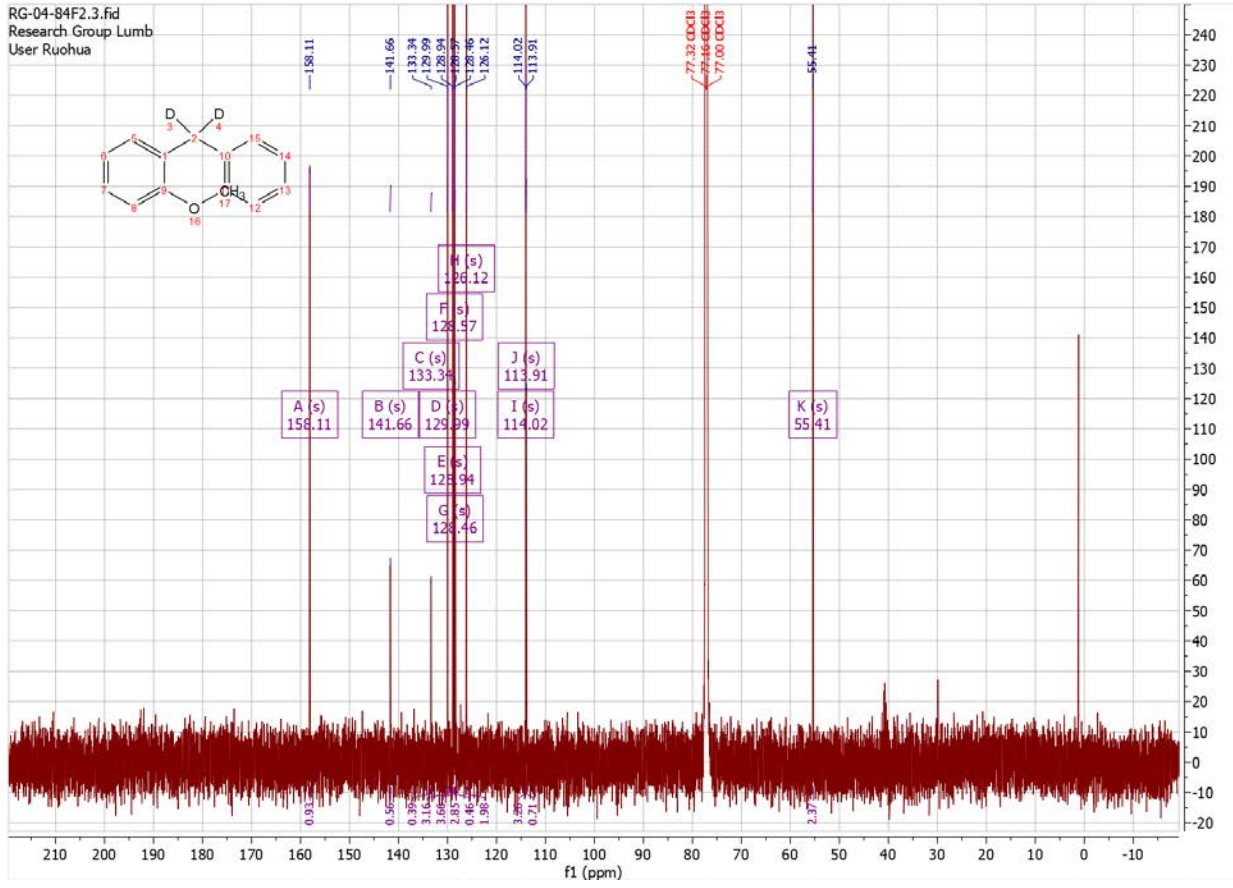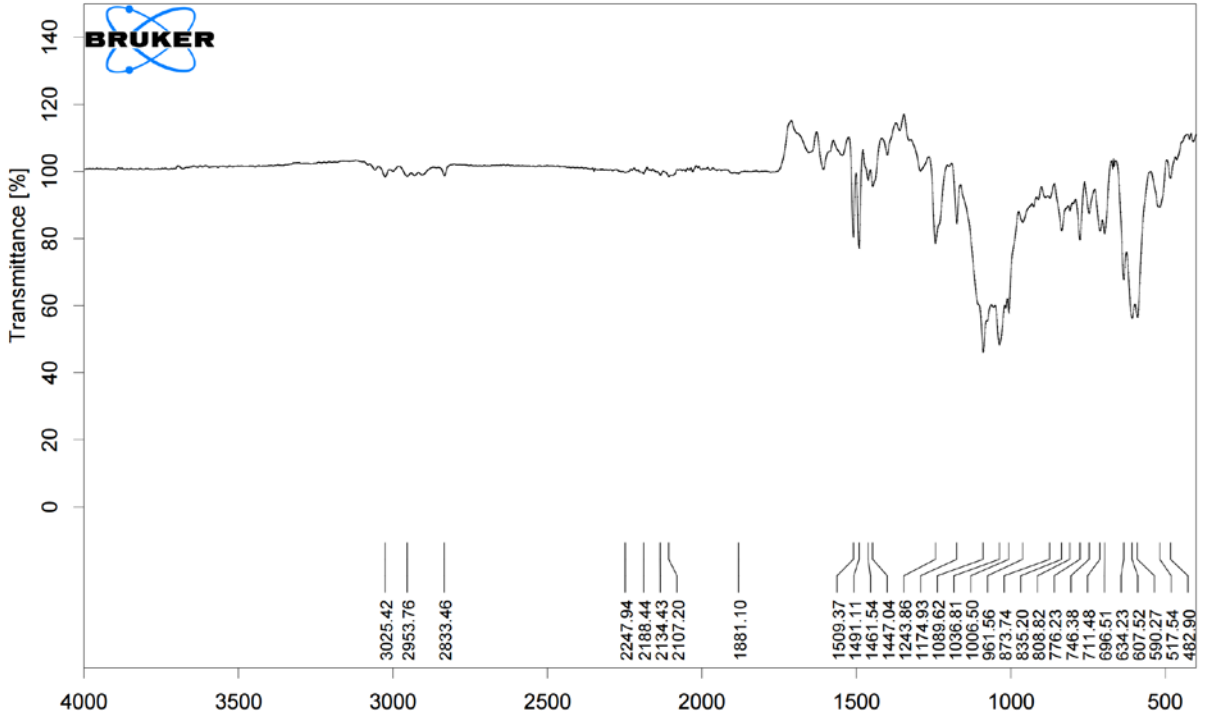

221109-04APCI- HRMS-Li-Ruohua Gui-RG-04-84\_221109112853 #202-212 RT: 0.48-0.51 AV: 11 NL: 6.46E7  
T: FTMS + p APCI corona Full ms [150.0000-500.0000]

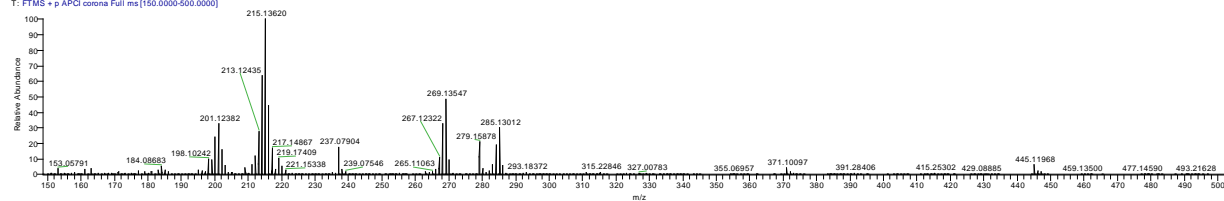

221109-04APCI- HRMS-Li-Ruohua Gui-RG-04-84\_221109112853 #202-212 RT: 0.48-0.51 AV: 11 NL: 2.12E7  
T: FTMS + p APCI corona Full ms [150.0000-500.0000]

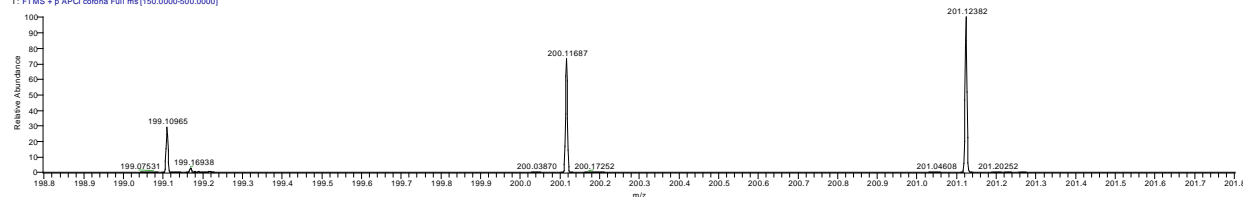

221109-04APCI- HRMS-Li-Ruohua Gui-RG-04-84\_221109112853 #202-212 RT: 0.48-0.51 AV: 11  
T: FTMS + p APCI corona Full ms [150.0000-500.0000]

m/z = 201.11330-201.12523

| m/z       | Intensity  | Relative | Resolution | Charge | Theo. Mass | Delta (ppm) | RDB equiv. | Composition                                      |
|-----------|------------|----------|------------|--------|------------|-------------|------------|--------------------------------------------------|
| 201.12382 | 21188554.0 | 100.00   | 37415.57   | 1.00   | 201.12430  | -2.38       | 7.5        | C <sub>14</sub> H <sub>13</sub> H <sub>2</sub> O |

20220909 RG-04-27D-F16\_PROTON\_01  
RG-04-27D-F16

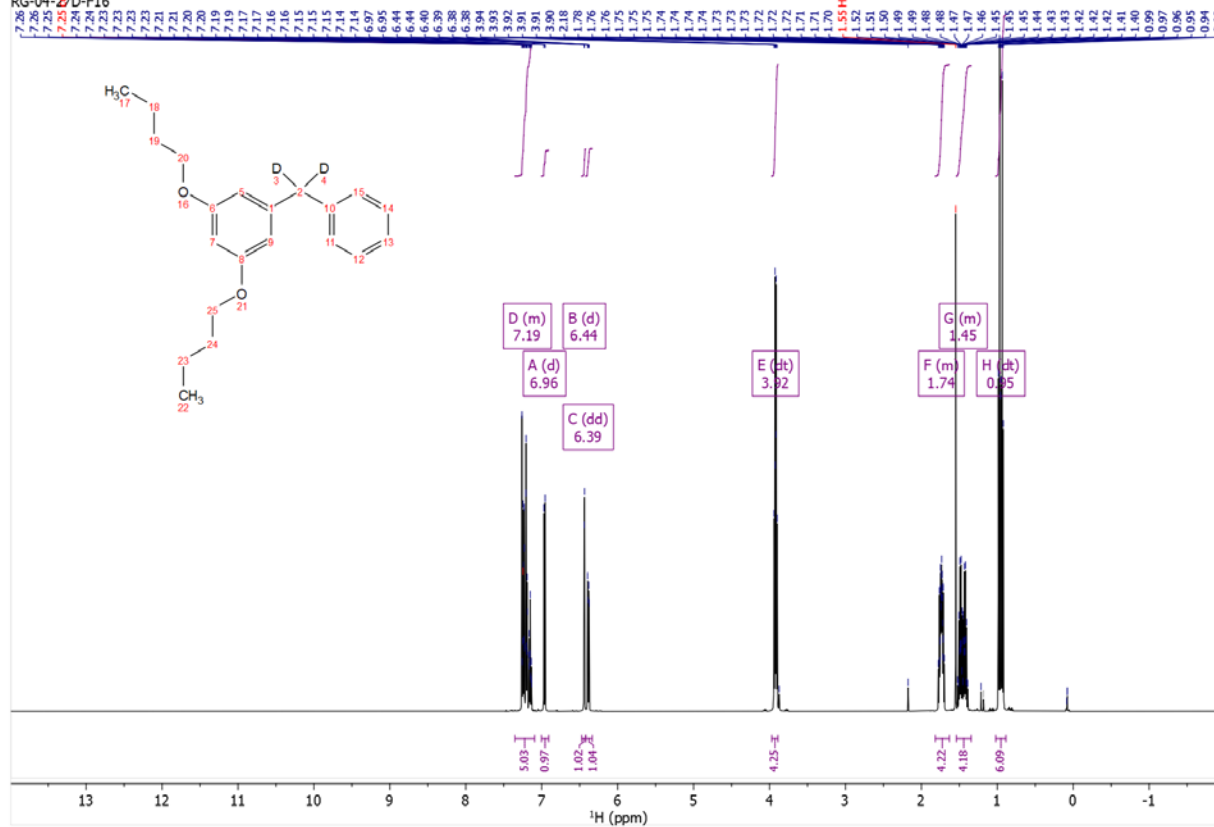

RG-04-27D.1.fid  
Research Group Li  
User ruohua

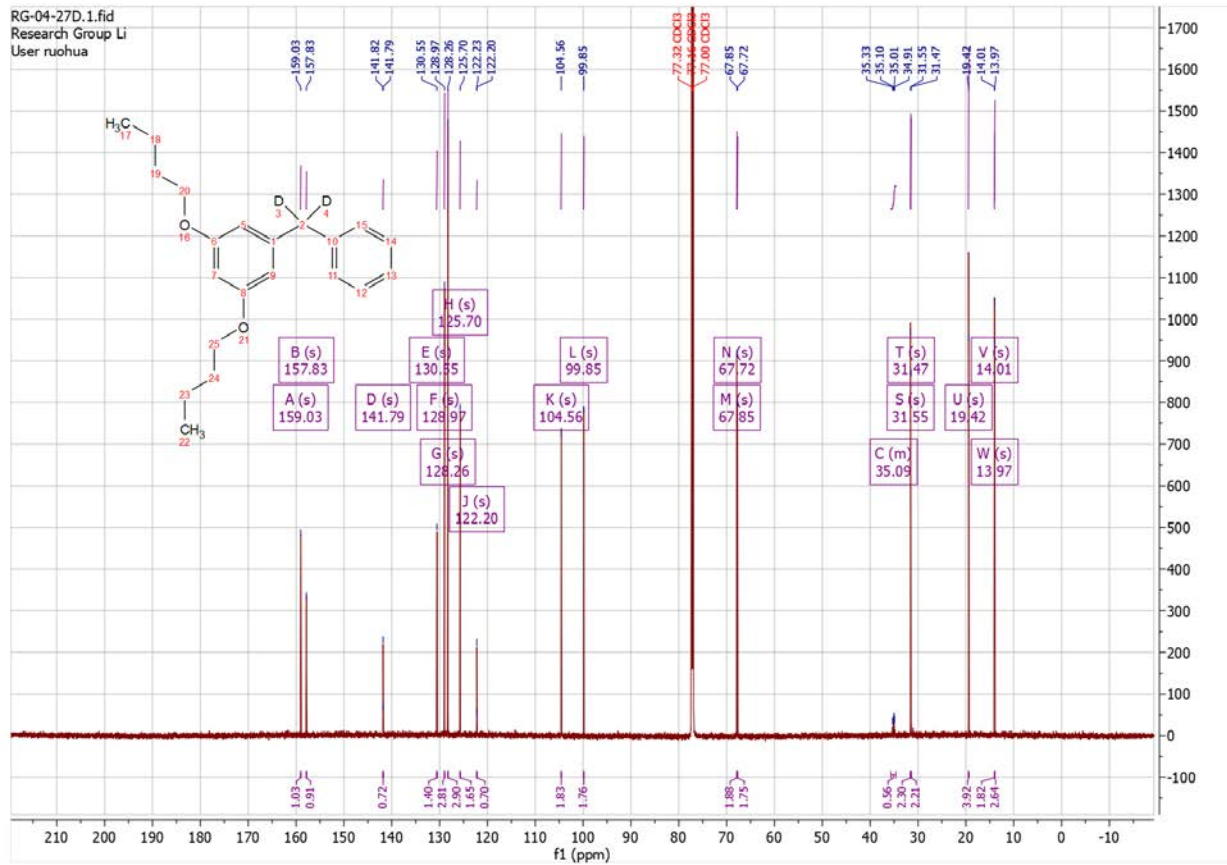

RG-04-27D-F16.1.fid  
Li  
1d\_2H CDCl3 D:\rgui 122

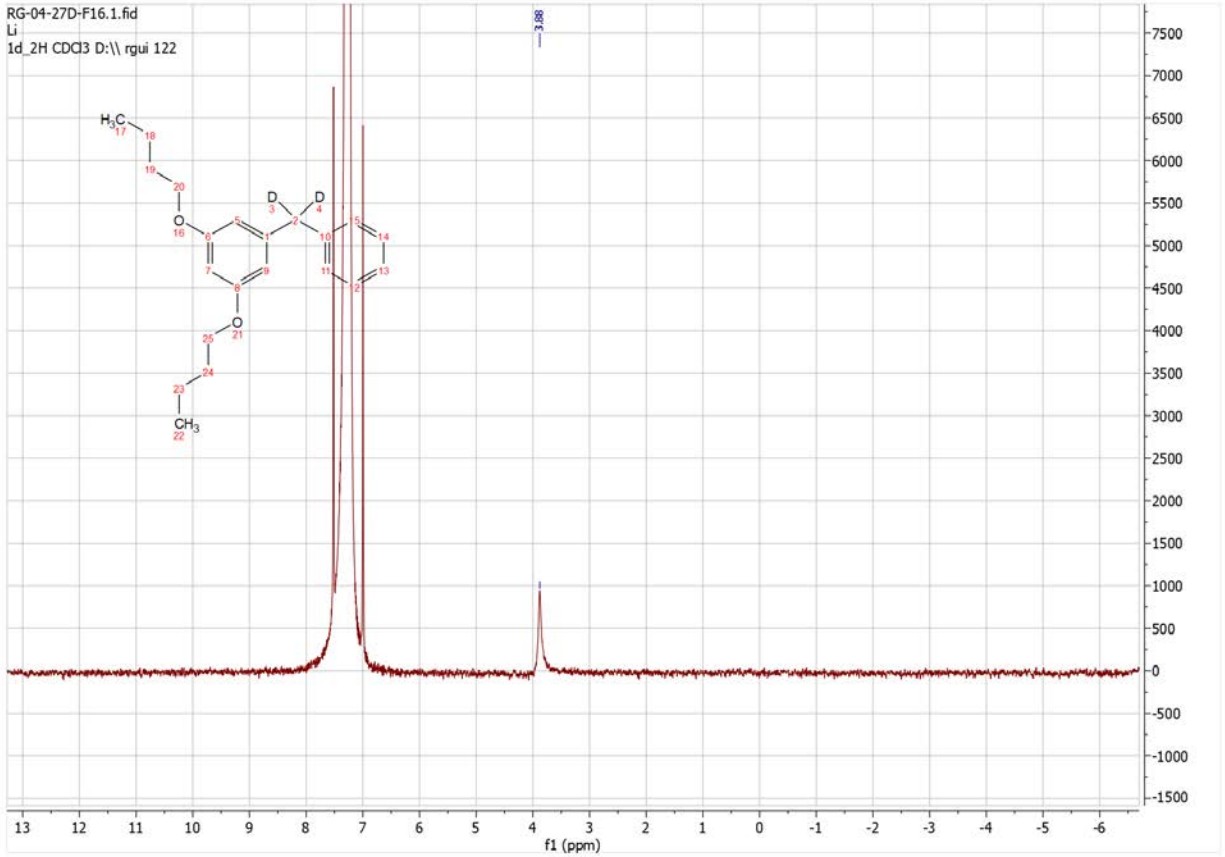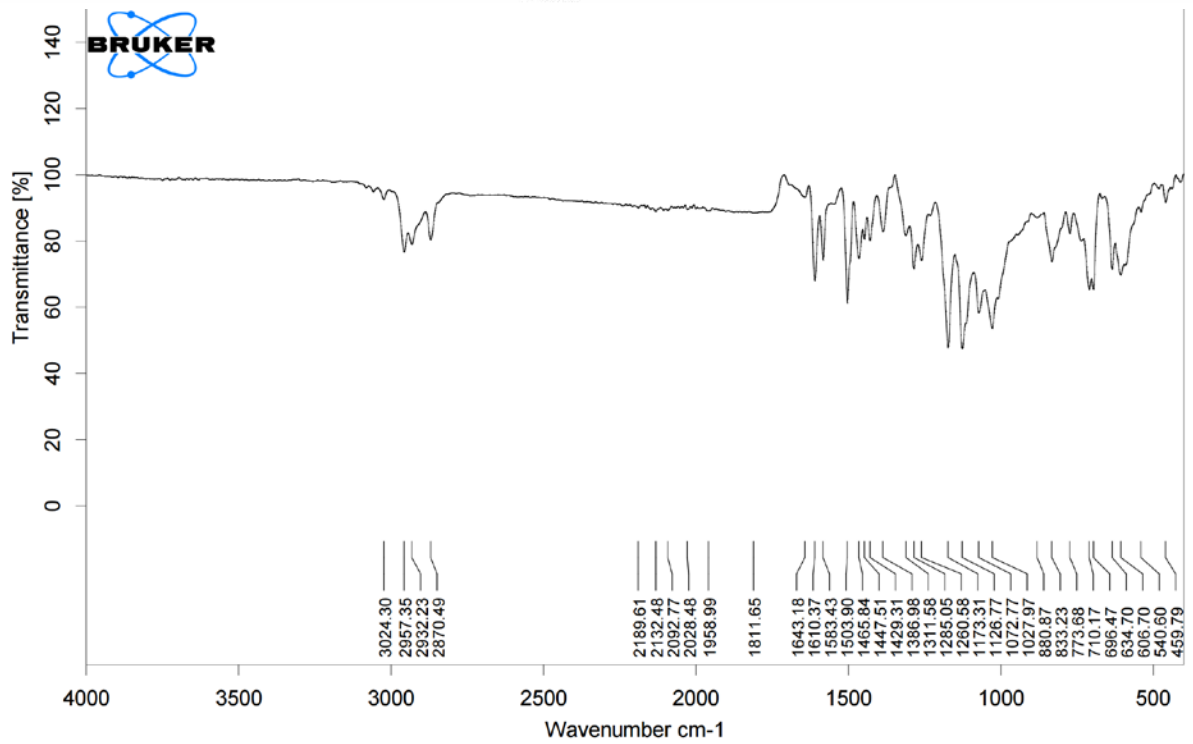

# Mass Spectrum SmartFormula Report

**Analysis Info**

Analysis Name D:\Data\Li\2022-09-13 Li-Gui RG-04-27D APCI +ve.d  
 Method APCI\_Tune\_pos\_Low\_AW Small.m  
 Sample Name 2022-09-13 Li-Gui RG-04-27D APCI +ve  
 Comment

Acquisition Date 9/13/2022 4:34:19 PM  
 Operator Alex  
 Instrument maXis impact 282001.00044

**Acquisition Parameter**

|             |            |                      |          |                  |           |
|-------------|------------|----------------------|----------|------------------|-----------|
| Source Type | APCI       | Ion Polarity         | Positive | Set Nebulizer    | 4.0 Bar   |
| Focus       | Not active | Set Capillary        | 4000 V   | Set Dry Heater   | 150 °C    |
| Scan Begin  | 90 m/z     | Set End Plate Offset | -500 V   | Set Dry Gas      | 1.5 l/min |
| Scan End    | 1250 m/z   | Set Charging Voltage | 2000 V   | Set Divert Valve | Source    |
|             |            | Set Corona           | 4000 nA  | Set APCI Heater  | 450 °C    |

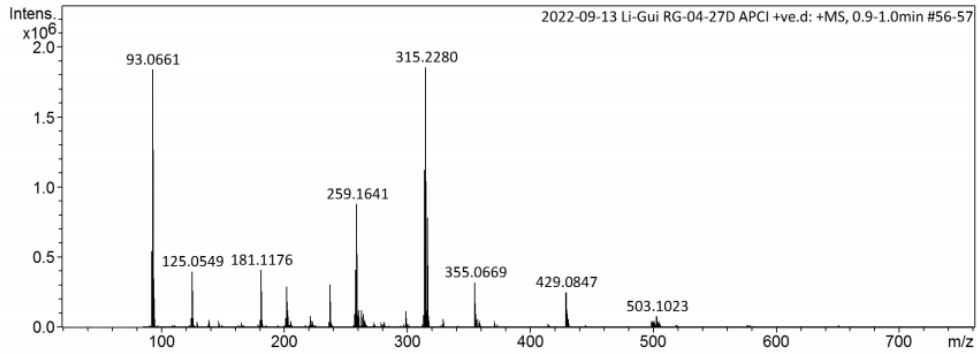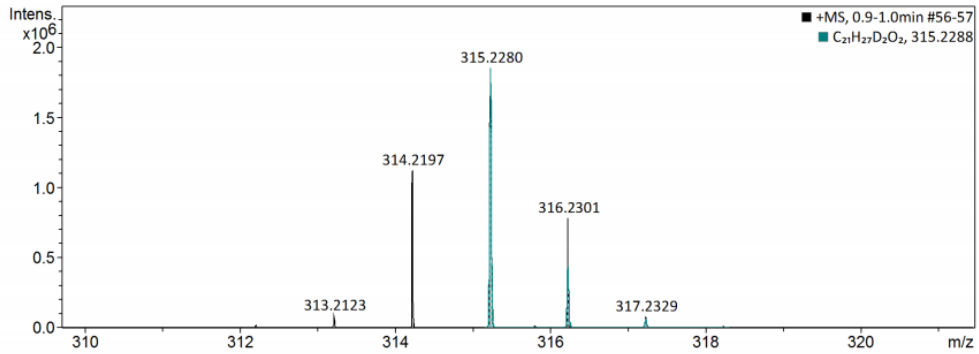

| Meas. m/z | # | Ion Formula | m/z      | err [ppm] | mSigma | # mSigma | Score  | rdB | e <sup>-</sup> Conf | N-Rule |
|-----------|---|-------------|----------|-----------|--------|----------|--------|-----|---------------------|--------|
| 314.2197  | 1 | C21H26D2O2  | 314.2209 | 3.8       | 547.6  | 1        | 65.61  | 8.0 | odd                 | ok     |
|           | 2 | C21H24D3O2  | 314.2194 | -1.1      | 547.7  | 2        | 100.00 | 8.5 | even                | ok     |
|           | 3 | C19H26DN3O  | 314.2211 | 4.5       | 553.9  | 3        | 14.42  | 8.0 | odd                 | ok     |
|           | 4 | C19H24D2N3O | 314.2196 | -0.5      | 554.0  | 4        | 27.36  | 8.5 | even                | ok     |
|           | 5 | C17H24DN6   | 314.2198 | 0.2       | 560.2  | 5        | 7.00   | 8.5 | even                | ok     |
|           | 6 | C17H22D2N6  | 314.2182 | -4.7      | 560.3  | 6        | 3.19   | 9.0 | odd                 | ok     |
|           | 7 | C16H30N2O4  | 314.2200 | 0.9       | 570.3  | 7        | 0.64   | 3.0 | odd                 | ok     |
|           | 8 | C16H28DN2O4 | 314.2185 | -4.1      | 570.4  | 8        | 0.36   | 3.5 | even                | ok     |
|           | 9 | C14H28N5O3  | 314.2187 | -3.4      | 576.6  | 9        | 0.10   | 3.5 | even                | ok     |
| 315.2280  | 1 | C21H27D2O2  | 315.2288 | 2.5       | 110.1  | 1        | 97.82  | 7.5 | even                | ok     |

2022-09-13 Li-Gui RG-04-27D APCI +ve.d

Bruker Compass DataAnalysis 4.2

printed: 9/13/2022 4:38:02 PM

by: Alex

Page 1 of 2





RG-04-28B-F23.2.fid  
Li  
1d\_2H CDCl3 D:\rgui 160

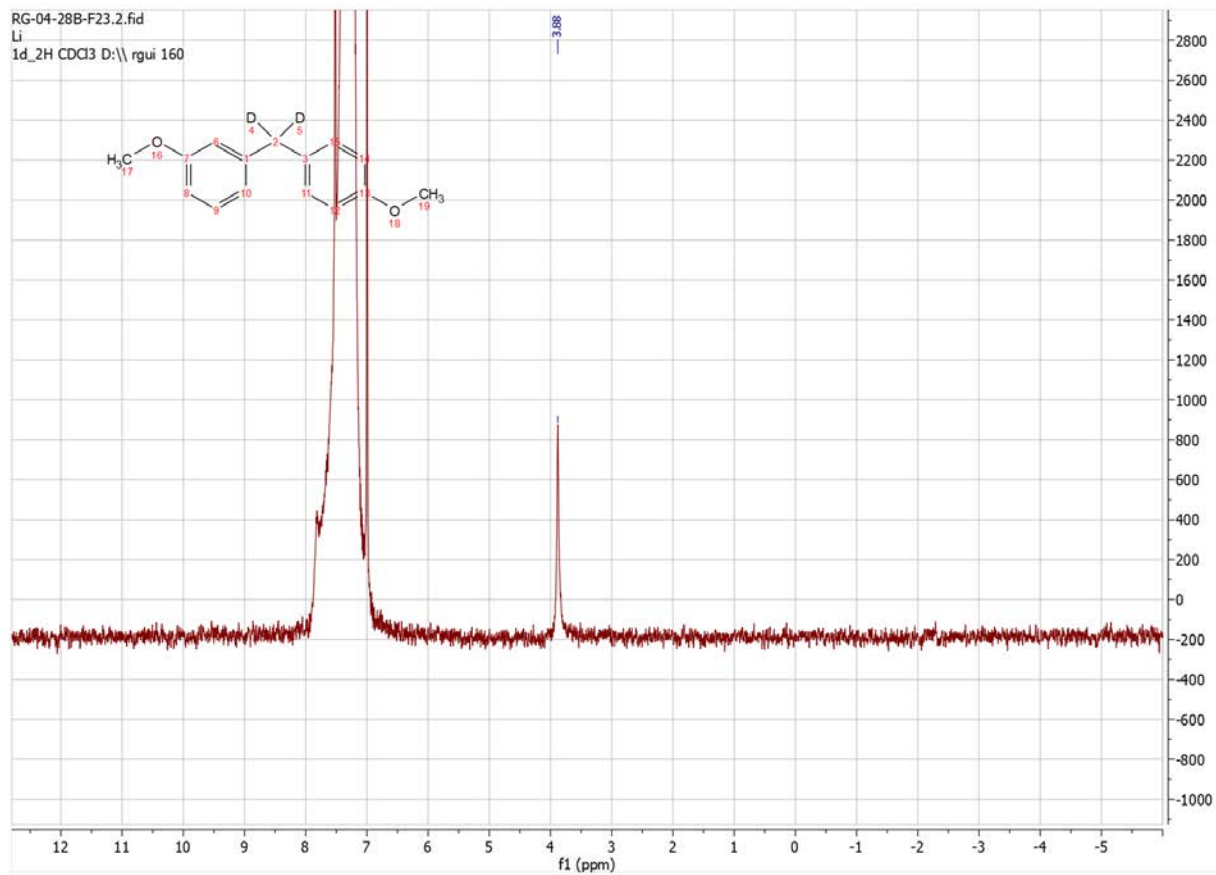

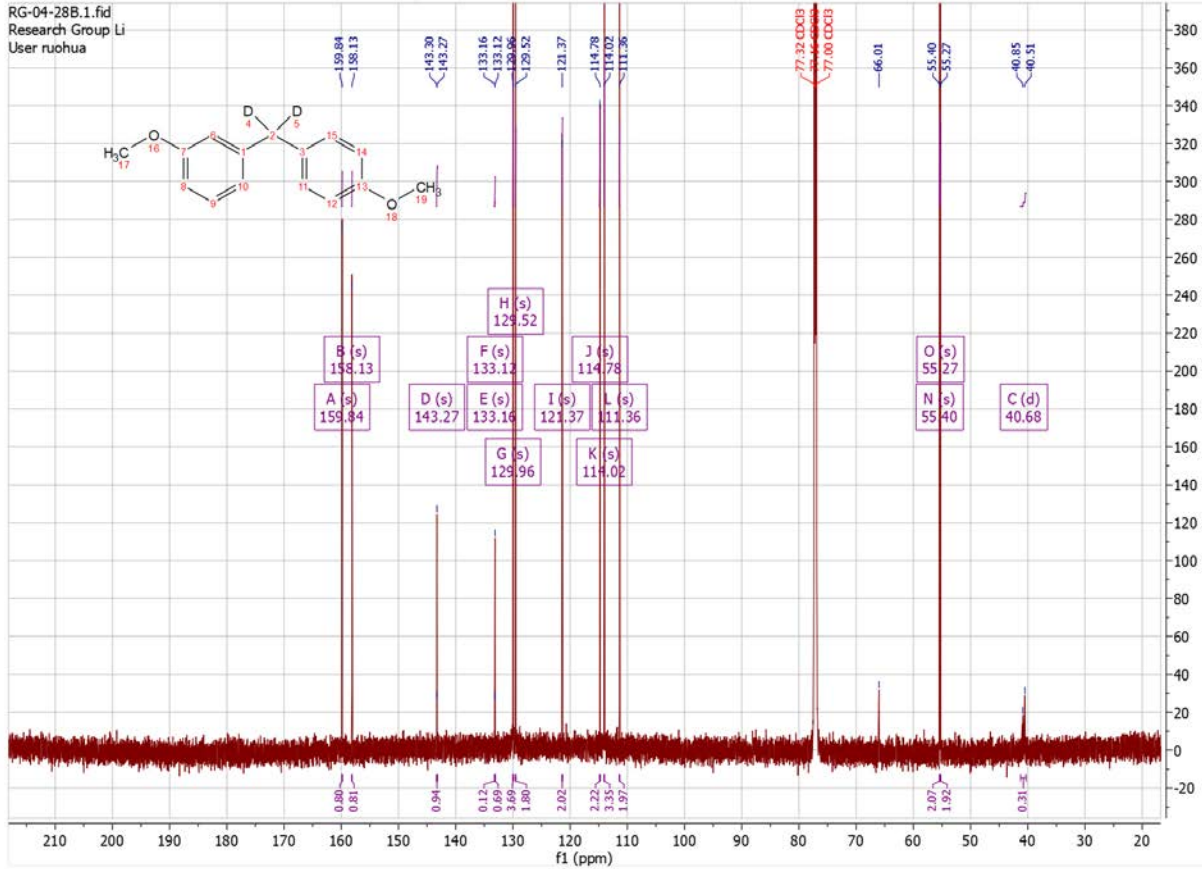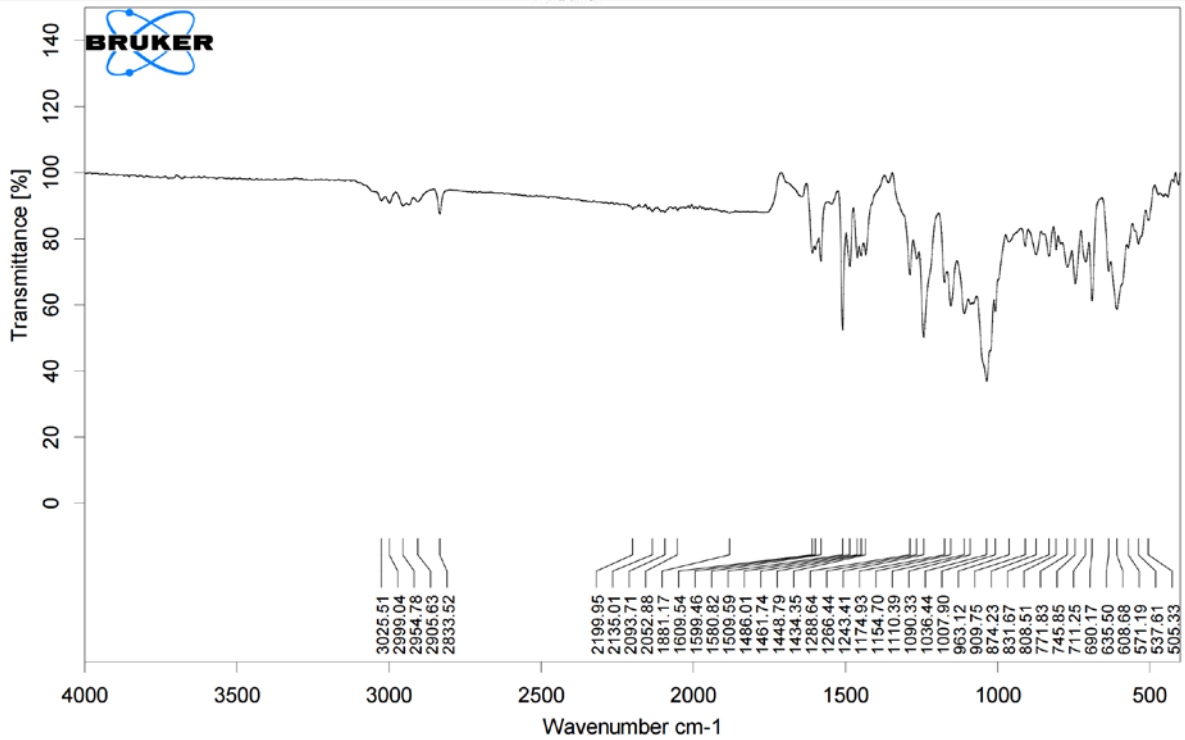

# Mass Spectrum SmartFormula Report

**Analysis Info**

Analysis Name D:\Data\Li\2022-09-13 Li-Gui RG-04-28B APCI +ve.d  
 Method APCI\_Tune\_pos\_Low\_AW\_Small.m  
 Sample Name 2022-09-13 Li-Gui RG-04-28B APCI +ve  
 Comment

Acquisition Date 9/13/2022 2:50:02 PM  
 Operator Alex  
 Instrument maXis impact 282001.00044

**Acquisition Parameter**

|             |            |                      |          |                  |           |
|-------------|------------|----------------------|----------|------------------|-----------|
| Source Type | APCI       | Ion Polarity         | Positive | Set Nebulizer    | 4.0 Bar   |
| Focus       | Not active | Set Capillary        | 4000 V   | Set Dry Heater   | 150 °C    |
| Scan Begin  | 90 m/z     | Set End Plate Offset | -500 V   | Set Dry Gas      | 1.5 l/min |
| Scan End    | 1250 m/z   | Set Charging Voltage | 2000 V   | Set Divert Valve | Source    |
|             |            | Set Corona           | 4000 nA  | Set APCI Heater  | 450 °C    |

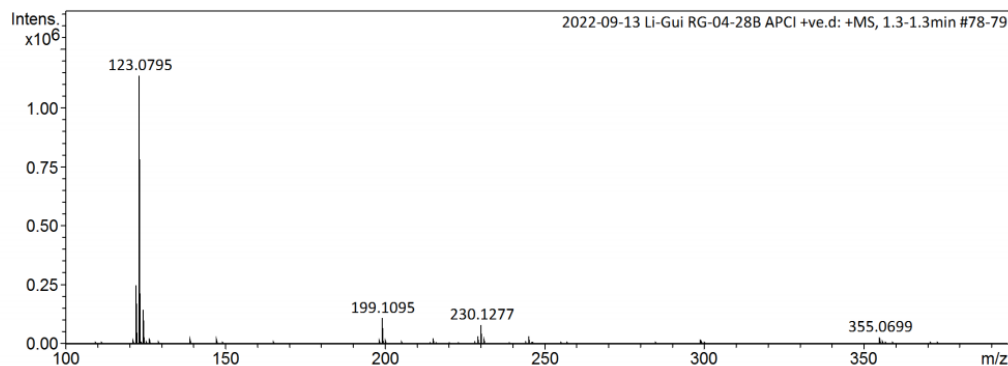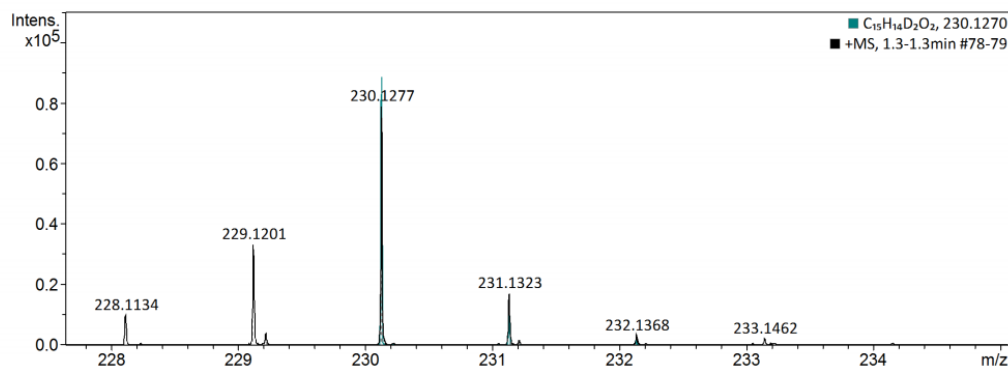

| Meas. m/z | # | Ion Formula                                      | m/z      | err [ppm] | mSigma | # mSigma | Score  | rdb | e <sup>-</sup> Conf | N-Rule |
|-----------|---|--------------------------------------------------|----------|-----------|--------|----------|--------|-----|---------------------|--------|
| 123.0795  | 1 | C <sub>8</sub> H <sub>9</sub> DO                 | 123.0789 | -5.1      | 21.7   | 1        | 100.00 | 4.0 | odd                 | ok     |
|           | 2 | C <sub>6</sub> H <sub>9</sub> N <sub>3</sub>     | 123.0791 | -3.4      | 28.3   | 2        | 95.21  | 4.0 | odd                 | ok     |
| 199.1095  | 1 | C <sub>12</sub> H <sub>13</sub> N <sub>3</sub>   | 199.1104 | 4.4       | 4.6    | 1        | 89.29  | 8.0 | odd                 | ok     |
|           | 2 | C <sub>12</sub> H <sub>11</sub> DN <sub>3</sub>  | 199.1089 | -3.3      | 4.7    | 2        | 100.00 | 8.5 | even                | ok     |
|           | 3 | C <sub>14</sub> H <sub>11</sub> D <sub>2</sub> O | 199.1086 | -4.4      | 4.8    | 3        | 89.53  | 8.5 | even                | ok     |
|           | 4 | C <sub>14</sub> H <sub>13</sub> DO               | 199.1102 | 3.4       | 4.9    | 4        | 99.08  | 8.0 | odd                 | ok     |
| 230.1277  | 1 | C <sub>12</sub> H <sub>16</sub> NaO              | 199.1093 | -0.9      | 8.7    | 1        | 100.00 | 4.5 | even                | ok     |
|           | 2 | C <sub>15</sub> H <sub>16</sub> DO <sub>2</sub>  | 230.1286 | 3.9       | 31.8   | 1        | 87.47  | 7.5 | even                | ok     |
|           | 3 | C <sub>13</sub> H <sub>16</sub> N <sub>3</sub> O | 230.1288 | 4.8       | 38.5   | 3        | 65.36  | 7.5 | even                | ok     |

RG-04-27B-F5.1.fid

Li

1d\_PROTON CDCl3 D:\rgui 10

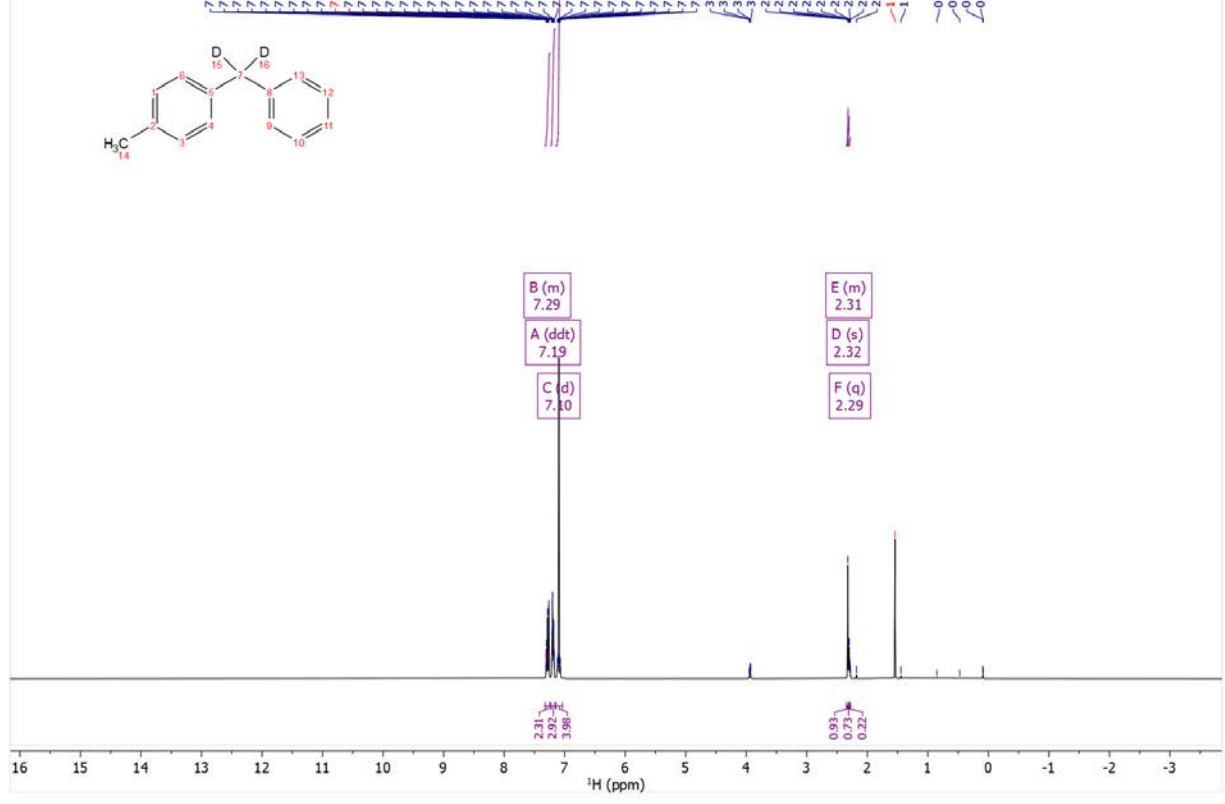

RG-04-27B-F5.2.fid  
Li  
1d\_2H CDCl3 D:\rgui 107

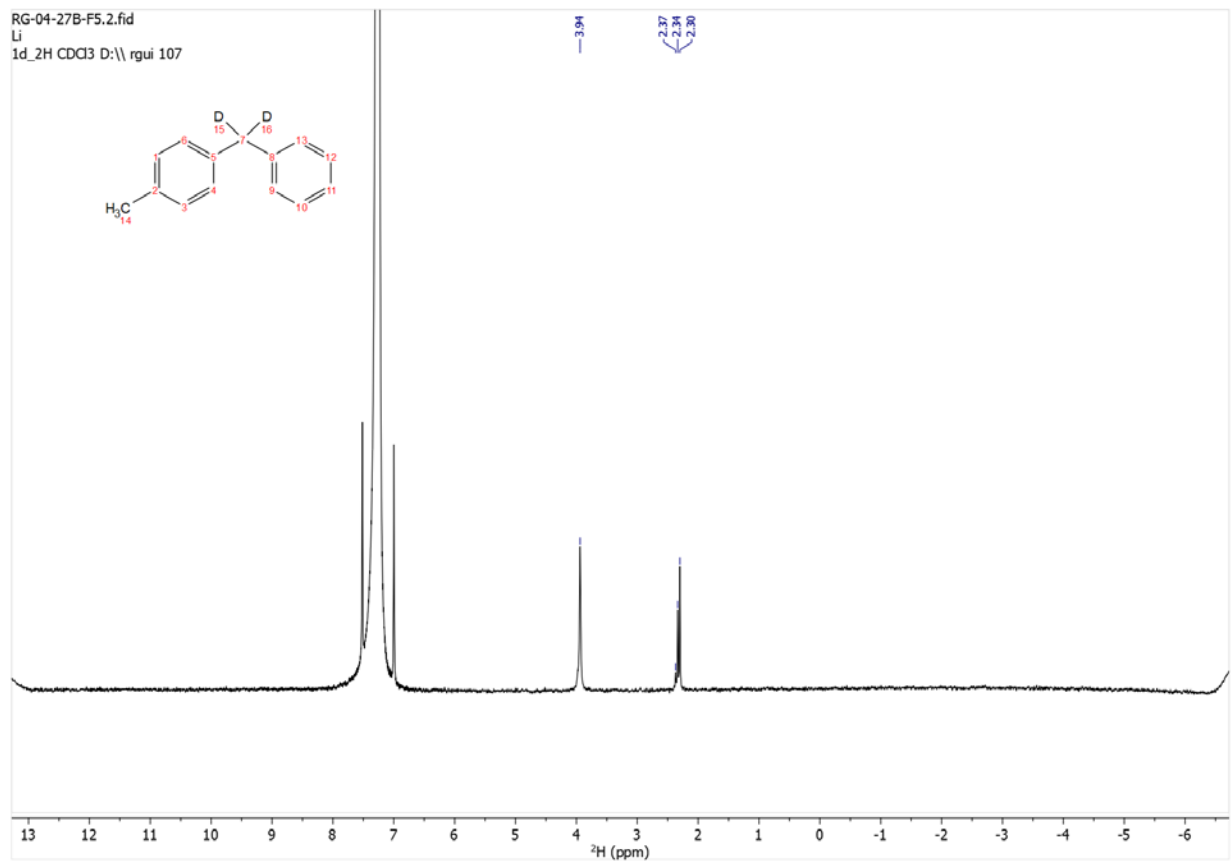



## Mass Spectrum SmartFormula Report

**Analysis Info**

Analysis Name D:\Data\Li\2022-09-13 Li-Gui RG-04-27B APCI +ve.d  
 Method APCI\_Tune\_pos\_Low\_AW Small.m  
 Sample Name 2022-09-13 Li-Gui RG-04-27B APCI +ve  
 Comment

Acquisition Date 9/13/2022 3:27:05 PM

Operator Alex  
 Instrument maXis impact 282001.00044

**Acquisition Parameter**

|             |            |                      |          |                  |           |
|-------------|------------|----------------------|----------|------------------|-----------|
| Source Type | APCI       | Ion Polarity         | Positive | Set Nebulizer    | 4.0 Bar   |
| Focus       | Not active | Set Capillary        | 4000 V   | Set Dry Heater   | 150 °C    |
| Scan Begin  | 90 m/z     | Set End Plate Offset | -500 V   | Set Dry Gas      | 1.5 l/min |
| Scan End    | 1250 m/z   | Set Charging Voltage | 2000 V   | Set Divert Valve | Source    |
|             |            | Set Corona           | 4000 nA  | Set APCI Heater  | 450 °C    |

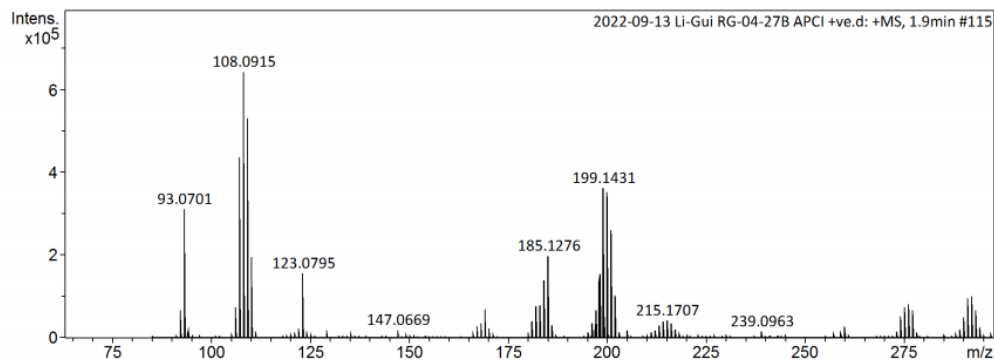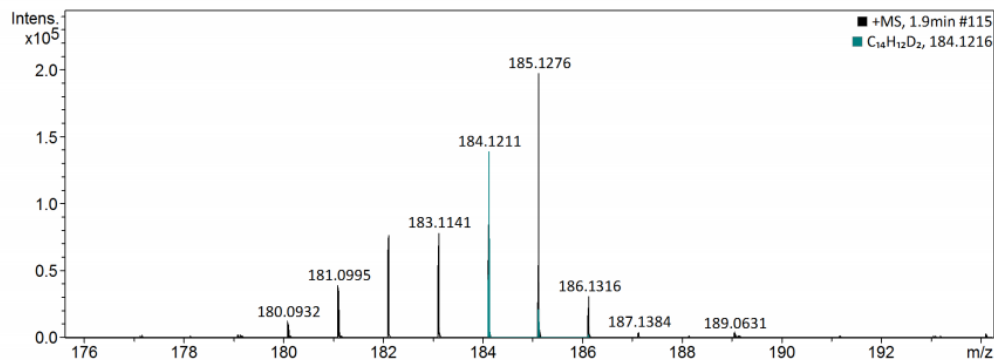

| Meas. m/z | # | Ion Formula | m/z      | err [ppm] | mSigma | # mSigma | Score  | rdb | e <sup>-</sup> Conf | N-Rule |
|-----------|---|-------------|----------|-----------|--------|----------|--------|-----|---------------------|--------|
| 182.1067  | 1 | C14H12D     | 182.1075 | 4.2       | 670.8  | 1        | 100.00 | 8.5 | even                | ok     |
|           | 2 | C14H10D2    | 182.1059 | -4.3      | 670.9  | 2        | 96.49  | 9.0 | odd                 | ok     |
|           | 3 | C9H14N2O2   | 182.1050 | -9.4      | 681.3  | 3        | 3.19   | 4.0 | odd                 | ok     |
| 183.1141  | 1 | C14H13D     | 183.1153 | 6.6       | 741.1  | 1        | 64.75  | 8.0 | odd                 | ok     |
|           | 2 | C14H11D2    | 183.1137 | -1.9      | 741.2  | 2        | 100.00 | 8.5 | even                | ok     |
|           | 3 | C9H15N2O2   | 183.1128 | -6.9      | 753.5  | 3        | 1.50   | 3.5 | even                | ok     |
| 184.1211  | 1 | C14H12D2    | 184.1216 | 2.5       | 524.7  | 1        | 100.00 | 8.0 | odd                 | ok     |
|           | 2 | C14H10D3    | 184.1200 | -5.9      | 524.9  | 2        | 70.22  | 8.5 | even                | ok     |
|           | 3 | C9H16N2O2   | 184.1206 | -2.5      | 549.5  | 3        | 0.47   | 3.0 | odd                 | ok     |
|           | 4 | C7H14N5O    | 184.1193 | -9.8      | 555.9  | 4        | 0.05   | 3.5 | even                | ok     |

RG-04-27C-F4.1.fid

Li

1d\_PROTON CDCl3 D:\rgui 110

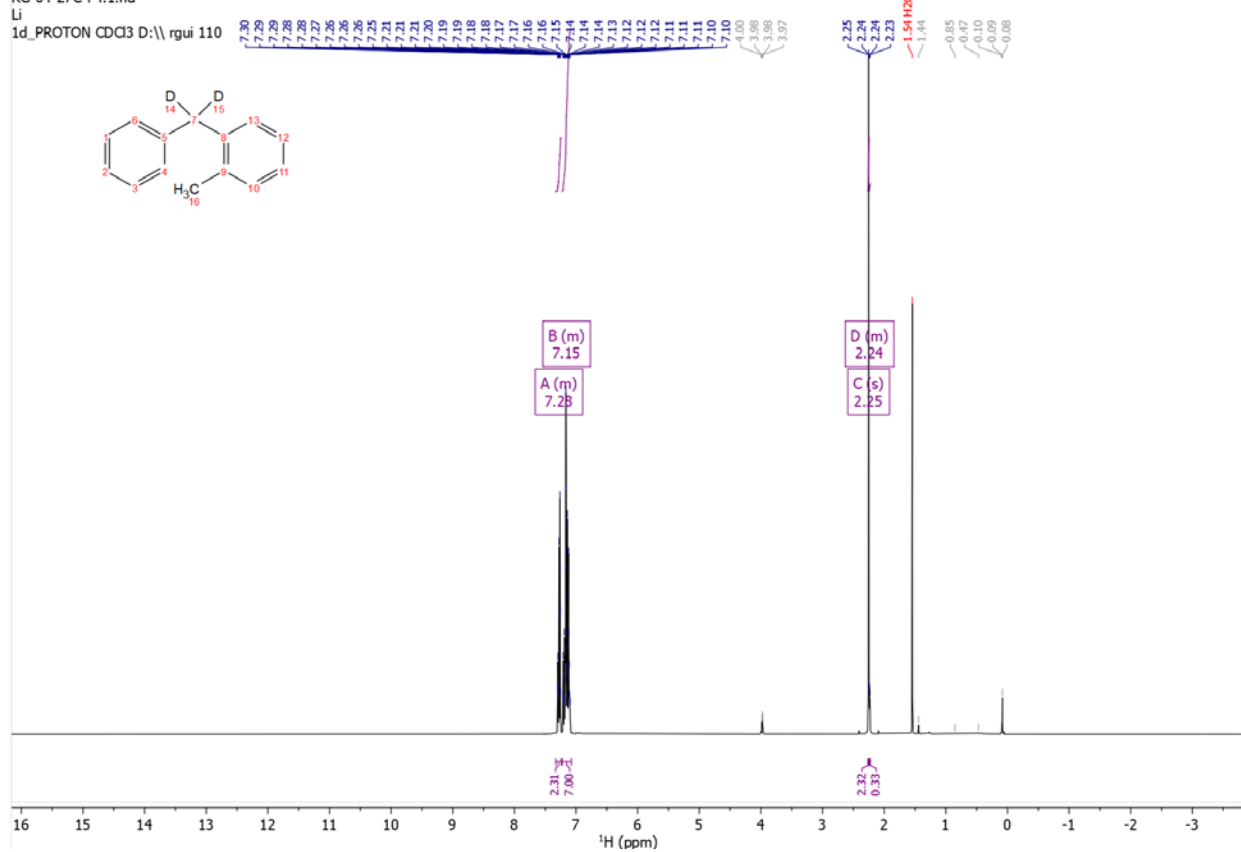



RG-04-27C-F4.2.fid  
Li  
1d\_2H CDCl3 D:\rgui 110

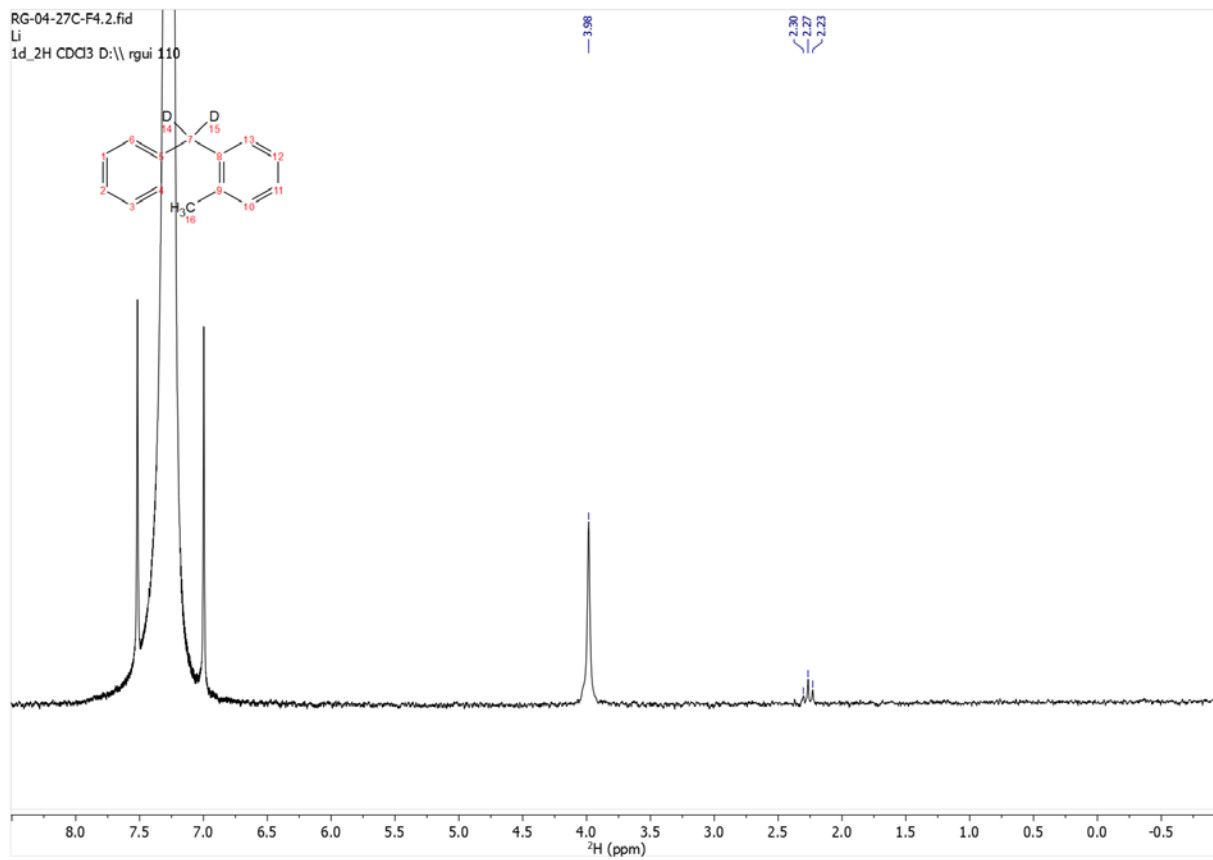

RG-04-27C.1.fid  
 Research Group Li  
 User ruohua

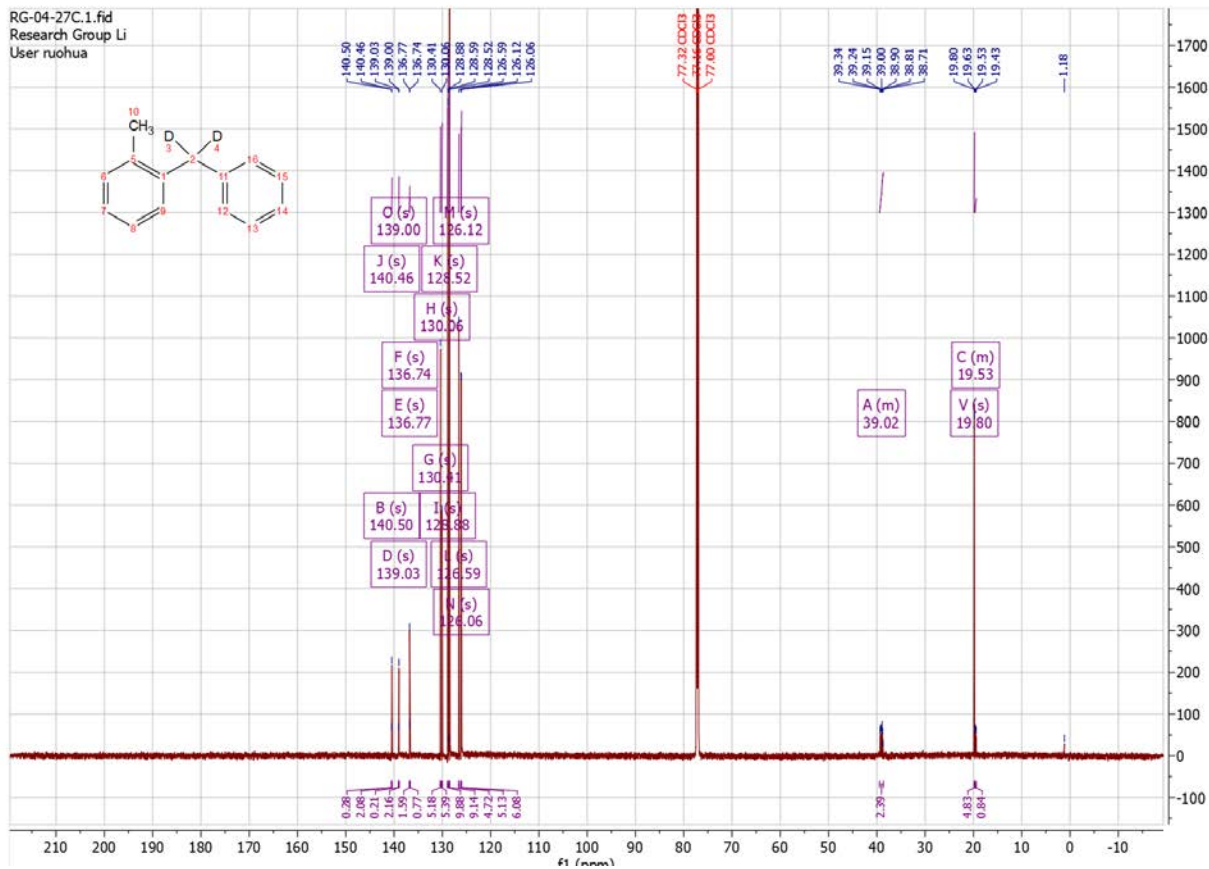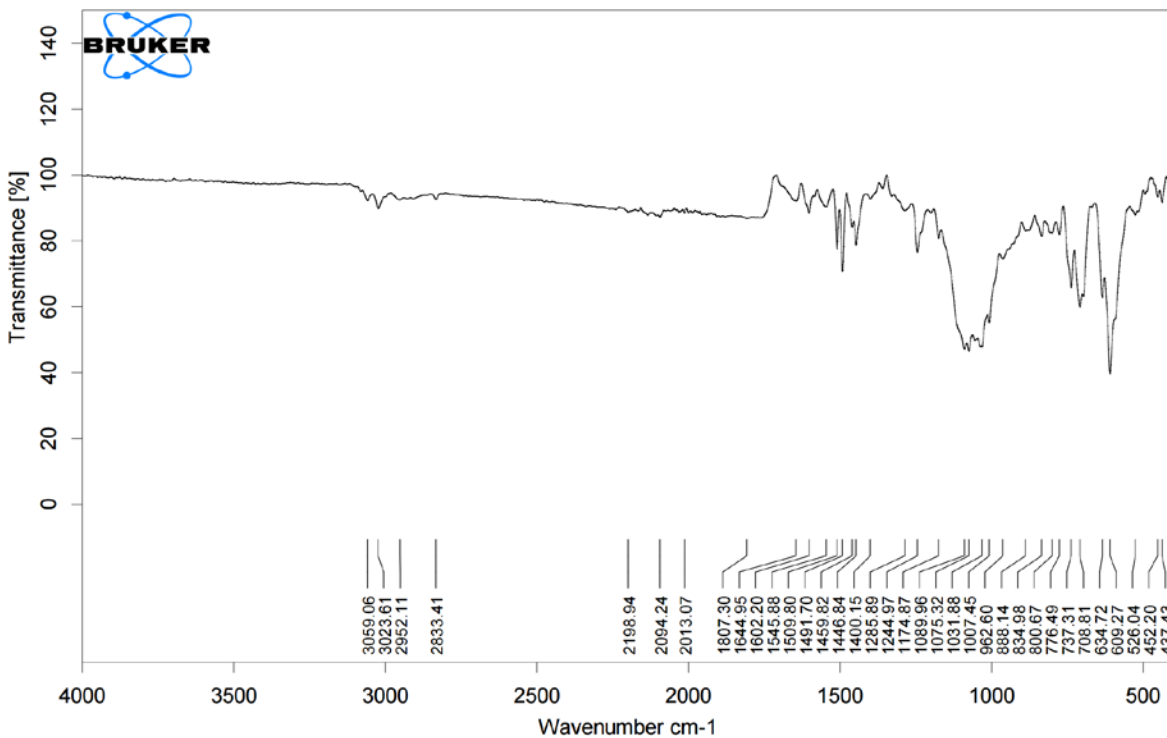

# Mass Spectrum SmartFormula Report

**Analysis Info**

Analysis Name D:\Data\Li\2022-09-13 Li-Gui RG-04-27C APCI +ve.d  
 Method APCI\_Tune\_pos\_Low\_AW Small.m  
 Sample Name 2022-09-13 Li-Gui RG-04-27C APCI +ve  
 Comment

Acquisition Date 9/13/2022 3:34:36 PM  
 Operator Alex  
 Instrument maXis impact 282001.00044

**Acquisition Parameter**

|             |            |                      |          |                  |           |
|-------------|------------|----------------------|----------|------------------|-----------|
| Source Type | APCI       | Ion Polarity         | Positive | Set Nebulizer    | 4.0 Bar   |
| Focus       | Not active | Set Capillary        | 4000 V   | Set Dry Heater   | 150 °C    |
| Scan Begin  | 90 m/z     | Set End Plate Offset | -500 V   | Set Dry Gas      | 1.5 l/min |
| Scan End    | 1250 m/z   | Set Charging Voltage | 2000 V   | Set Divert Valve | Source    |
|             |            | Set Corona           | 4000 nA  | Set APCI Heater  | 450 °C    |

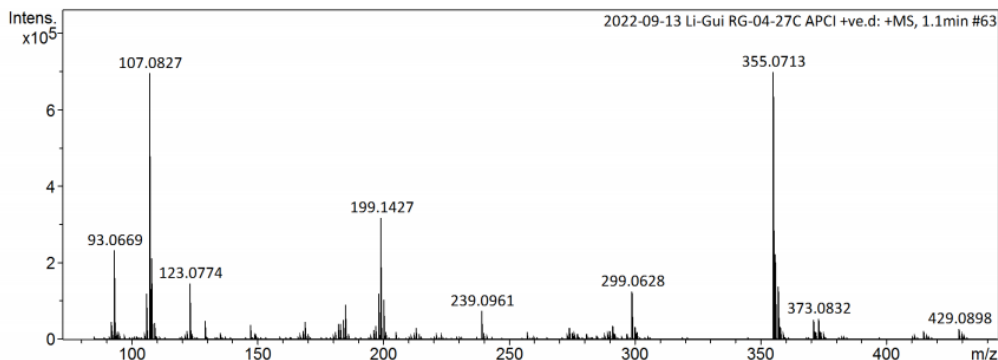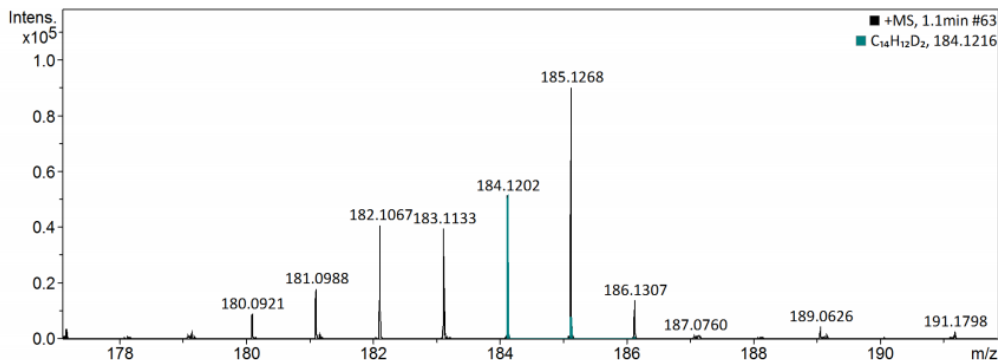

| Meas. m/z | # | Ion Formula | m/z      | err [ppm] | mSigma | # mSigma | Score  | rdb | e <sup>-</sup> Conf | N-Rule |
|-----------|---|-------------|----------|-----------|--------|----------|--------|-----|---------------------|--------|
| 182.1067  | 1 | C14H12D     | 182.1075 | 4.2       | 682.3  | 1        | 100.00 | 8.5 | even                | ok     |
|           | 2 | C14H10D2    | 182.1059 | -4.3      | 682.4  | 2        | 96.41  | 9.0 | odd                 | ok     |
|           | 3 | C9H14N2O2   | 182.1050 | -9.4      | 697.1  | 3        | 0.92   | 4.0 | odd                 | ok     |
| 183.1133  | 1 | C14H11D2    | 183.1137 | 2.6       | 700.1  | 1        | 100.00 | 8.5 | even                | ok     |
|           | 2 | C14H9D3     | 183.1122 | -5.9      | 700.1  | 2        | 71.65  | 9.0 | odd                 | ok     |
|           | 3 | C9H15N2O2   | 183.1128 | -2.5      | 710.2  | 3        | 5.67   | 3.5 | even                | ok     |
|           | 4 | C7H13N5O    | 183.1115 | -9.8      | 714.1  | 4        | 0.83   | 4.0 | odd                 | ok     |
| 184.1202  | 1 | C14H12D2    | 184.1216 | 7.6       | 554.8  | 1        | 53.16  | 8.0 | odd                 | ok     |
|           | 2 | C14H10D3    | 184.1200 | -0.8      | 555.0  | 2        | 100.00 | 8.5 | even                | ok     |
|           | 3 | C9H16N2O2   | 184.1206 | 2.5       | 578.3  | 3        | 0.42   | 3.0 | odd                 | ok     |

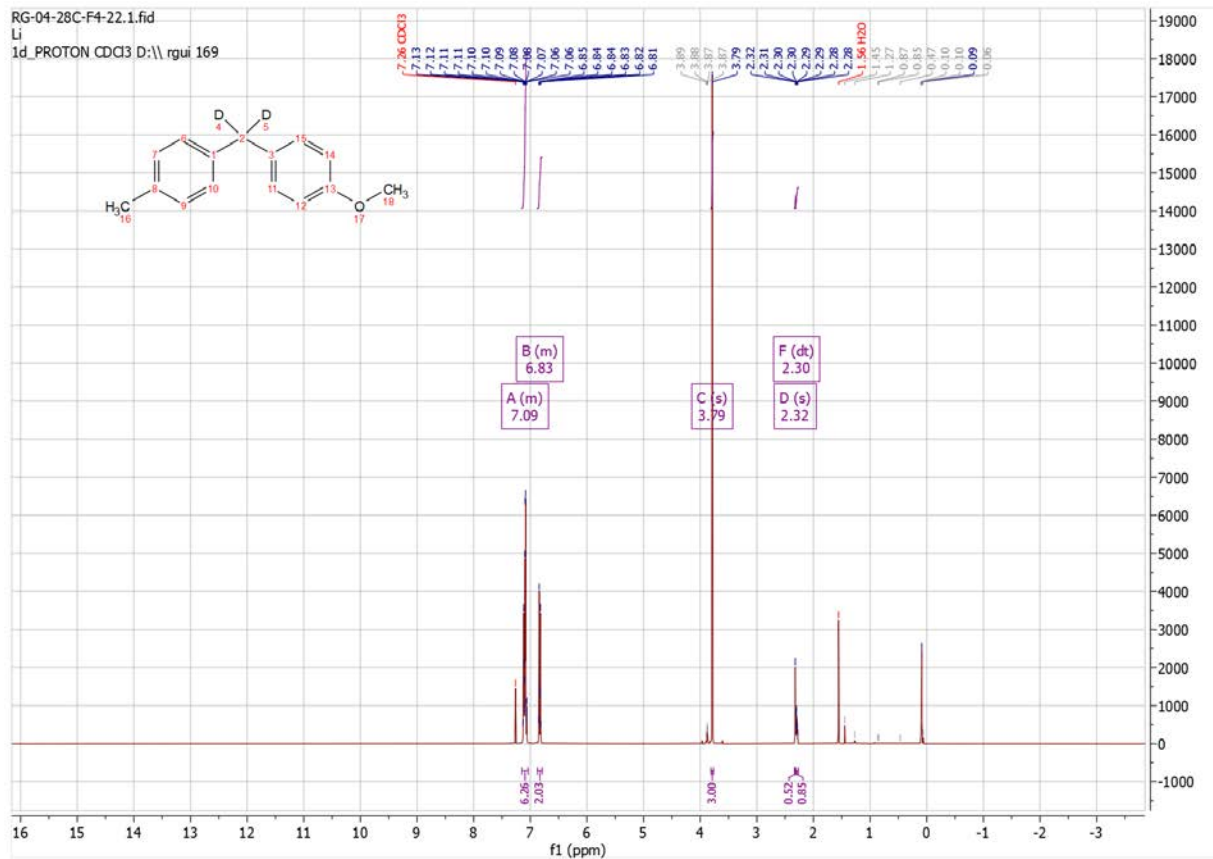

RG-04-28C-F4-22.2.fid  
Li  
1d\_2H CDCl3 D:\ rgui 169

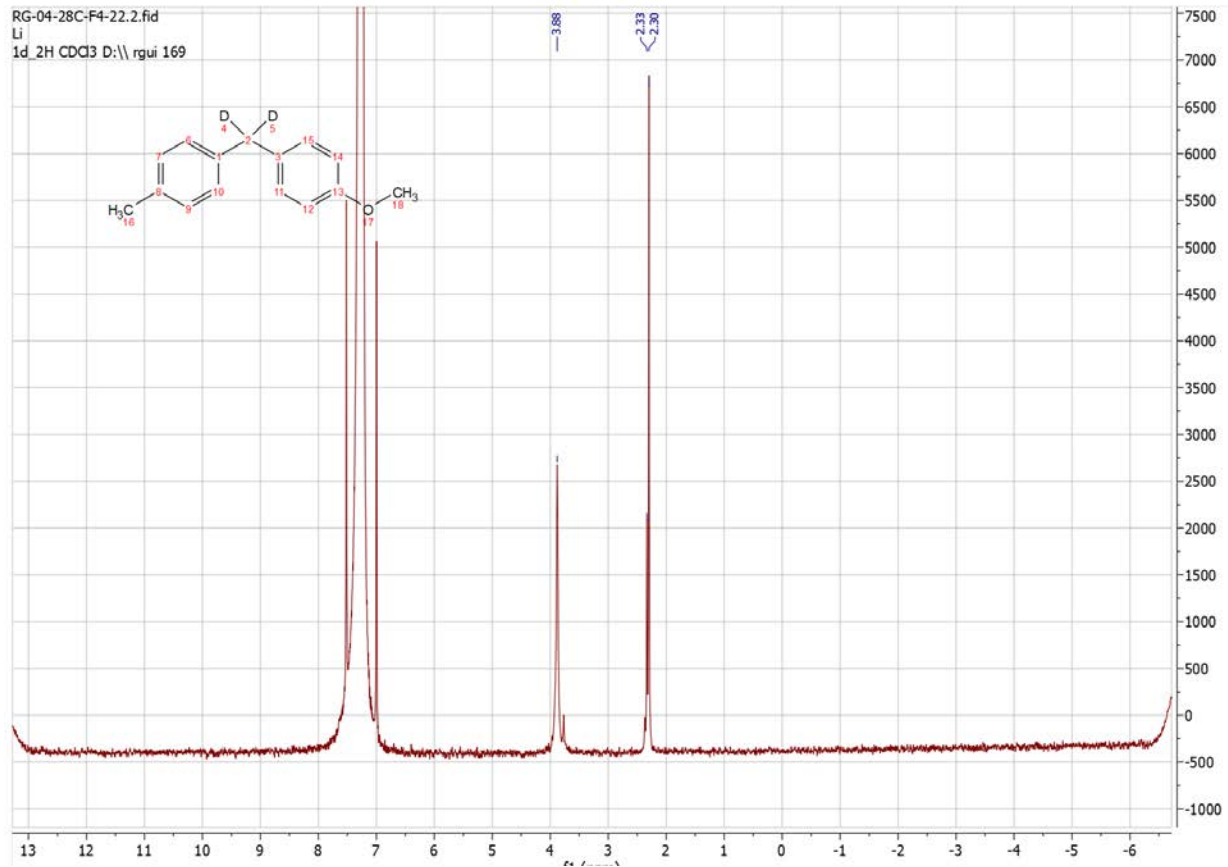

RG-04-28C.1.fid  
 Research Group Li  
 User ruchua

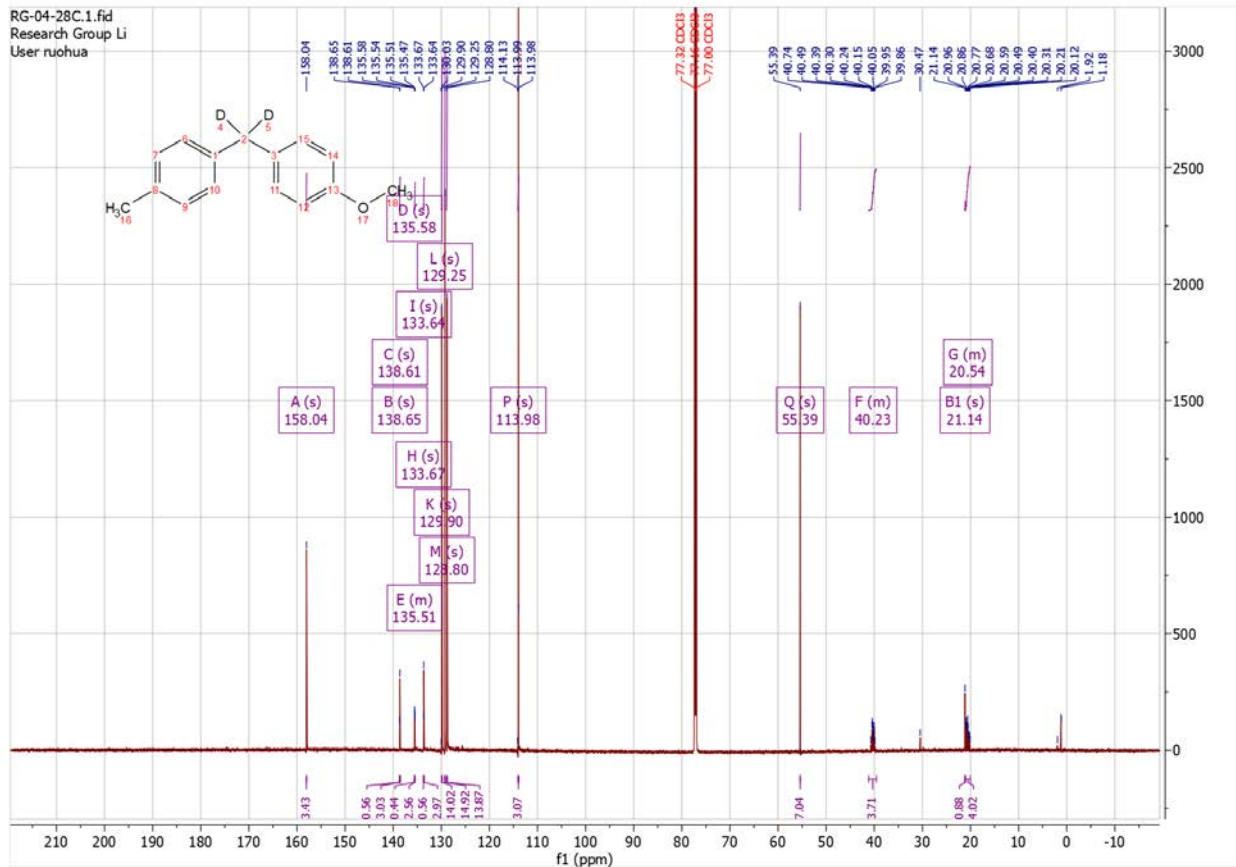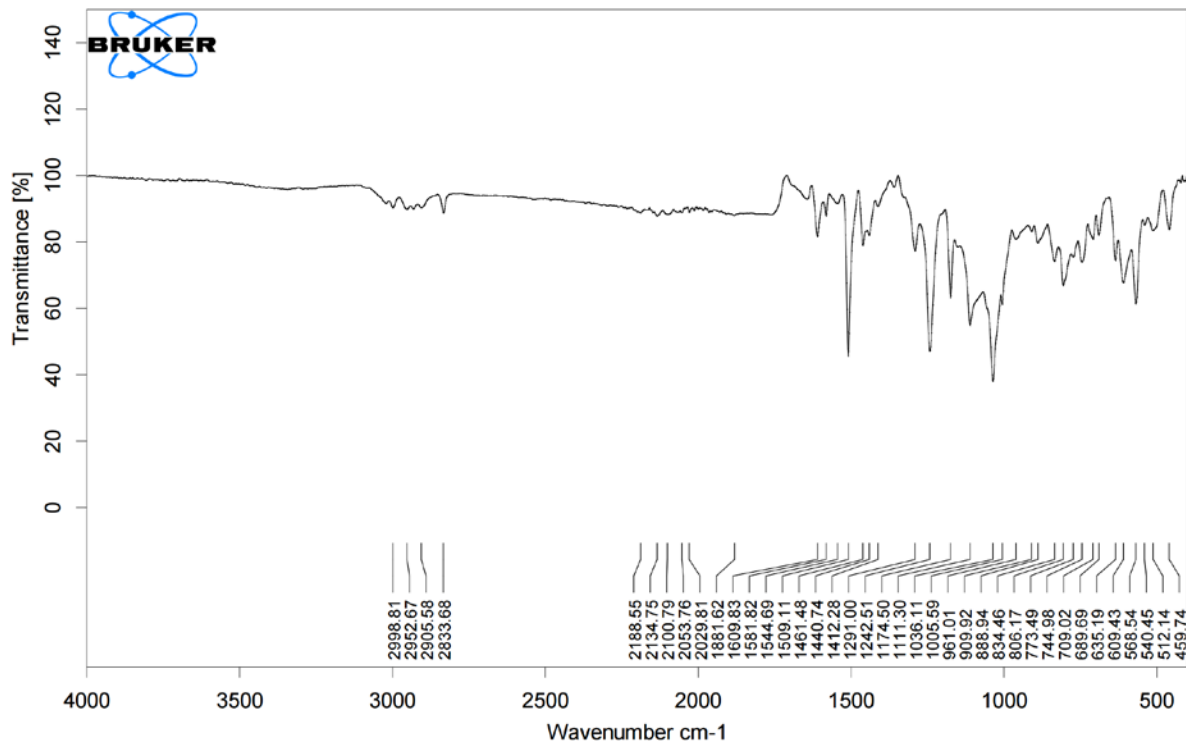

## Mass Spectrum SmartFormula Report

**Analysis Info**

Analysis Name D:\Data\Li\2022-09-13 Li-Gui RG-04-28C APCI +ve.d  
 Method APCI\_Tune\_pos\_Low\_AW Small.m  
 Sample Name 2022-09-13 Li-Gui RG-04-28C APCI +ve  
 Comment

Acquisition Date 9/13/2022 4:25:47 PM  
 Operator Alex  
 Instrument maXis impact 282001.00044

**Acquisition Parameter**

|             |            |                      |          |                  |           |
|-------------|------------|----------------------|----------|------------------|-----------|
| Source Type | APCI       | Ion Polarity         | Positive | Set Nebulizer    | 4.0 Bar   |
| Focus       | Not active | Set Capillary        | 4000 V   | Set Dry Heater   | 150 °C    |
| Scan Begin  | 90 m/z     | Set End Plate Offset | -500 V   | Set Dry Gas      | 1.5 l/min |
| Scan End    | 1250 m/z   | Set Charging Voltage | 2000 V   | Set Divert Valve | Source    |
|             |            | Set Corona           | 4000 nA  | Set APCI Heater  | 450 °C    |

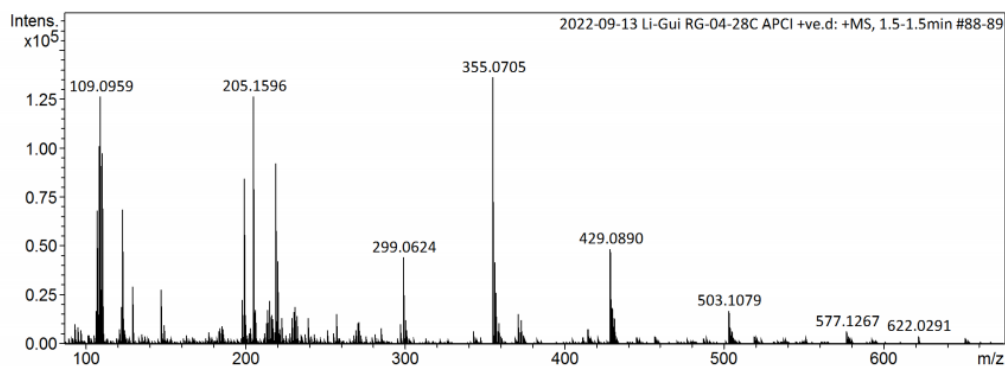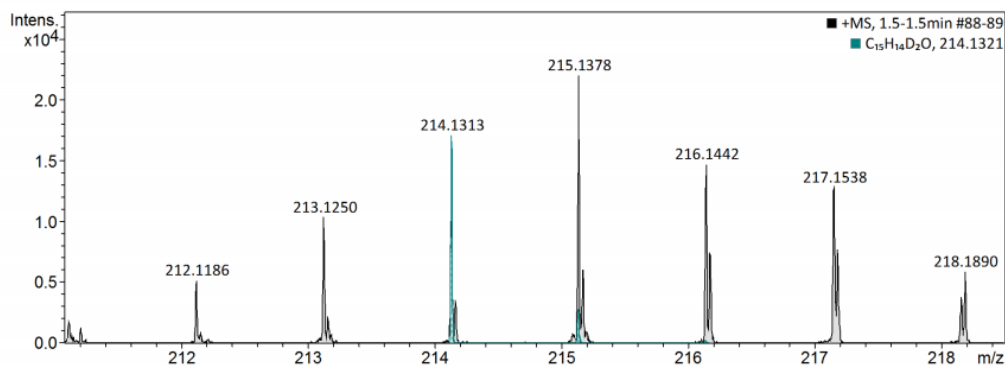

| Meas. m/z | # | Ion Formula | m/z      | err [ppm] | mSigma | # mSigma | Score  | rdb | e <sup>-</sup> Conf | N-Rule |
|-----------|---|-------------|----------|-----------|--------|----------|--------|-----|---------------------|--------|
| 123.0778  | 1 | C8H7D2O     | 123.0773 | -3.8      | 6.5    | 1        | 100.00 | 4.5 | even                | ok     |
|           | 2 | C6H7DN3     | 123.0776 | -2.1      | 12.2   | 2        | 99.01  | 4.5 | even                | ok     |
| 199.1091  | 1 | C14H11D2O   | 199.1086 | -2.5      | 25.8   | 1        | 100.00 | 8.5 | even                | ok     |
|           | 2 | C12H11DN3   | 199.1089 | -1.5      | 30.9   | 2        | 97.43  | 8.5 | even                | ok     |
| 205.1596  | 1 | C14H21O     | 205.1587 | -4.5      | 12.1   | 1        | 100.00 | 4.5 | even                | ok     |
| 213.1250  | 1 | C15H15DO    | 213.1258 | 4.1       | 736.4  | 1        | 92.27  | 8.0 | odd                 | ok     |
|           | 2 | C15H13D2O   | 213.1243 | -3.2      | 736.5  | 2        | 100.00 | 8.5 | even                | ok     |
|           | 3 | C13H15N3    | 213.1260 | 5.1       | 741.1  | 3        | 20.14  | 8.0 | odd                 | ok     |
|           | 4 | C13H13DN3   | 213.1245 | -2.2      | 741.2  | 4        | 27.14  | 8.5 | even                | ok     |
| 214.1313  | 1 | C15H14D2O   | 214.1321 | 3.7       | 626.2  | 1        | 100.00 | 8.0 | odd                 | ok     |

2022-09-13 Li-Gui RG-04-28C APCI +ve.d

Bruker Compass DataAnalysis 4.2

printed: 9/13/2022 4:32:15 PM

by: Alex

Page 1 of 2

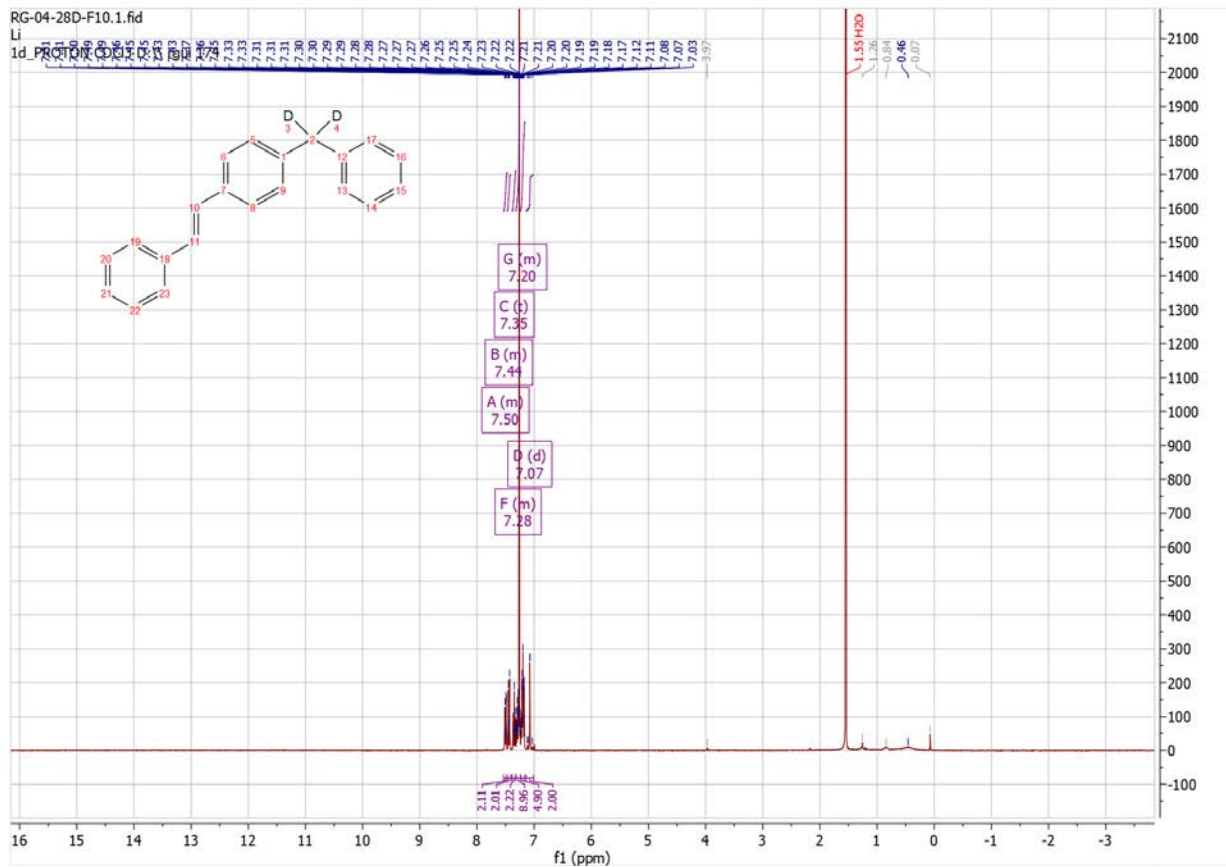



RG-04-28D-F2.2.fid  
Li  
1d\_2H CDCl3 D:\rgui 170

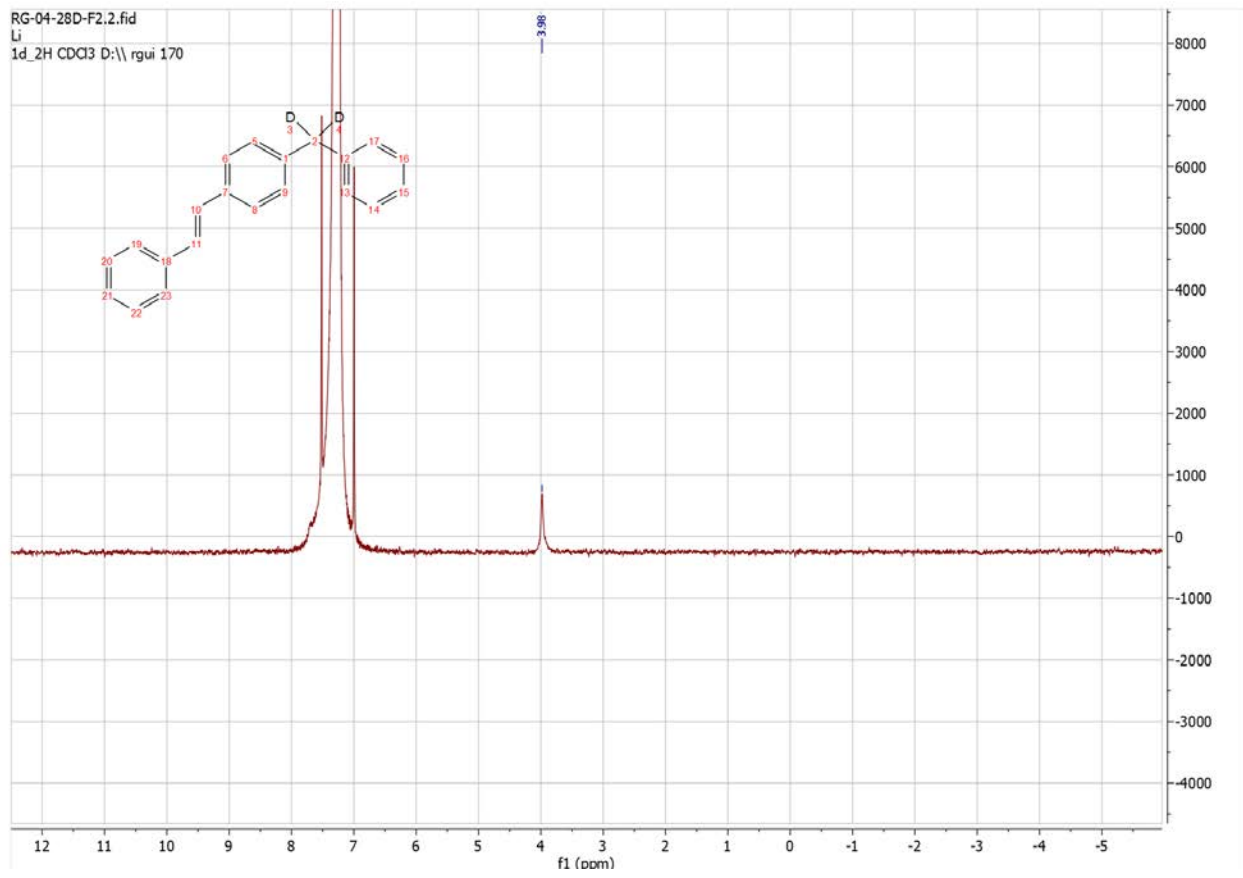

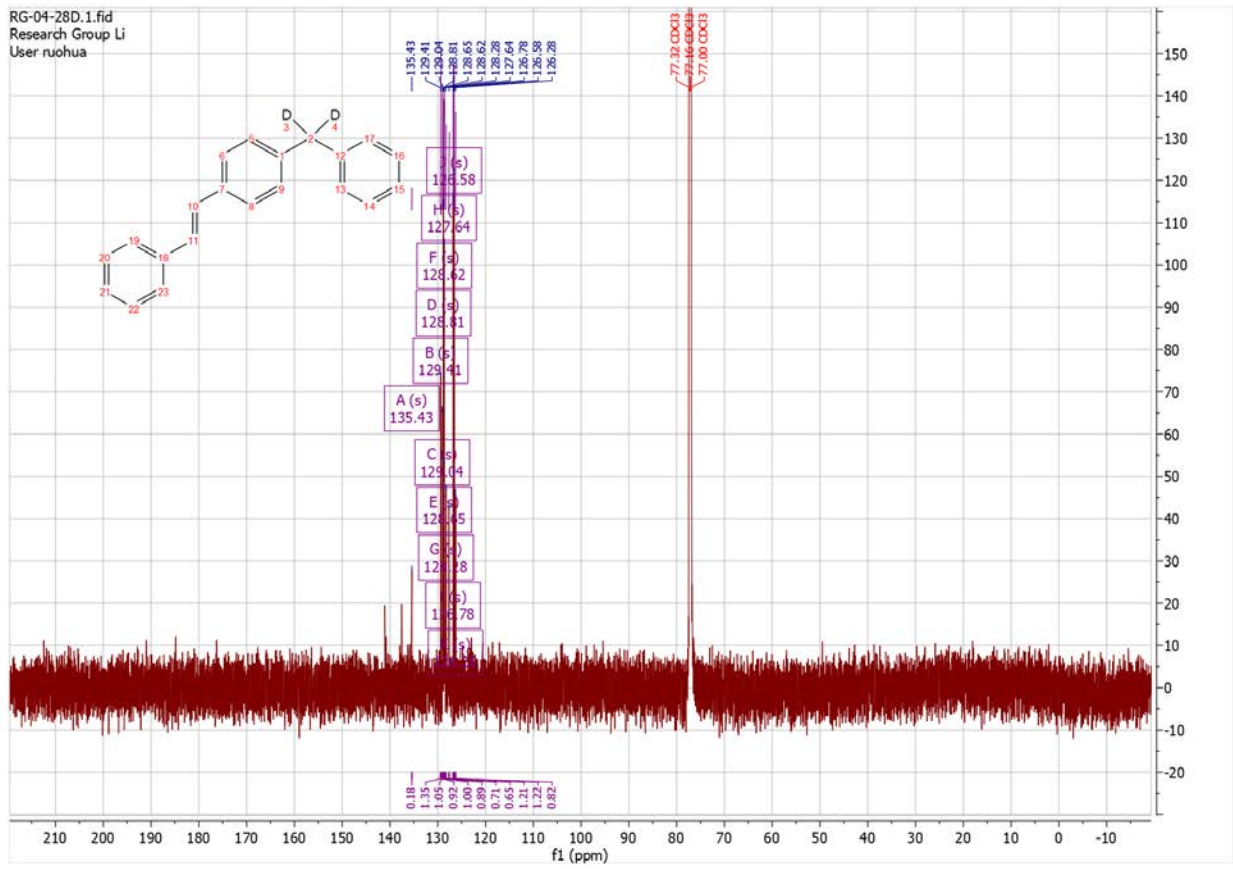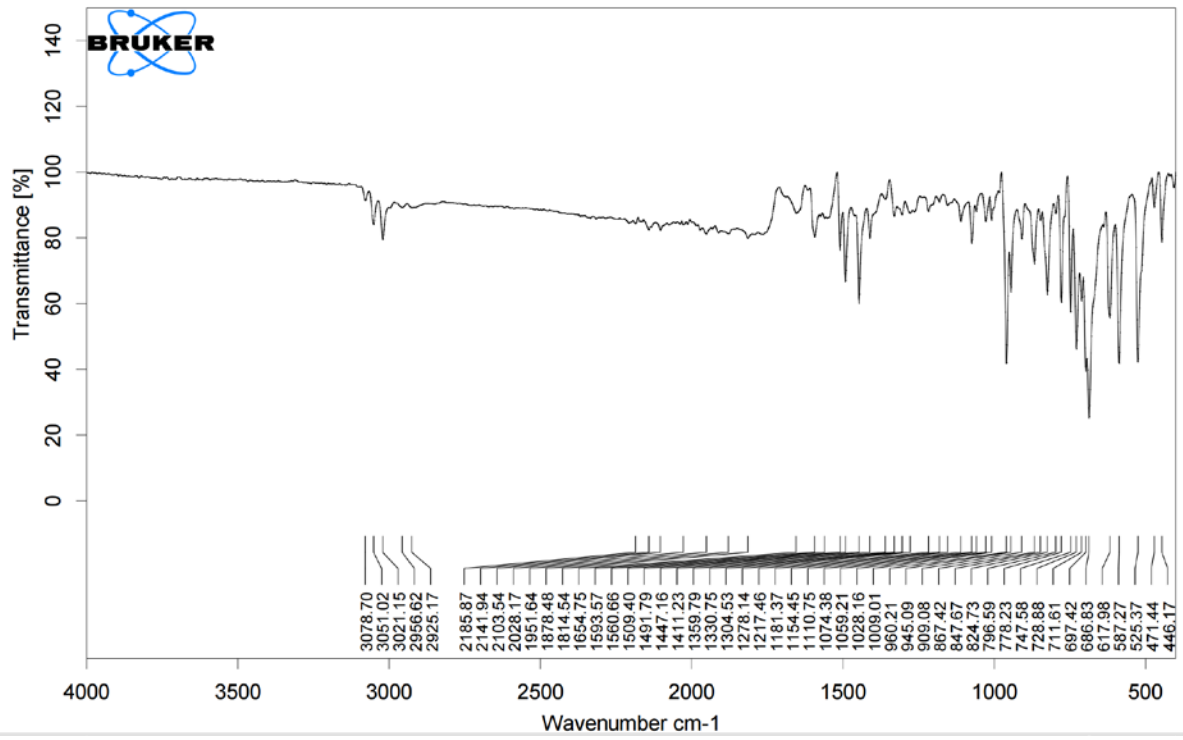

## Mass Spectrum SmartFormula Report

### Analysis Info

Analysis Name D:\Data\LI\2022-09-13 Li-Gui RG-04-28D APCI +ve.d  
 Method APCI\_Tune\_pos\_Low\_AW Small.m  
 Sample Name 2022-09-13 Li-Gui RG-04-28D APCI +ve  
 Comment

Acquisition Date 9/13/2022 3:44:01 PM  
 Operator Alex  
 Instrument maXis impact 282001.00044

### Acquisition Parameter

|             |            |                      |          |                  |           |
|-------------|------------|----------------------|----------|------------------|-----------|
| Source Type | APCI       | Ion Polarity         | Positive | Set Nebulizer    | 4.0 Bar   |
| Focus       | Not active | Set Capillary        | 4000 V   | Set Dry Heater   | 150 °C    |
| Scan Begin  | 90 m/z     | Set End Plate Offset | -500 V   | Set Dry Gas      | 1.5 l/min |
| Scan End    | 1250 m/z   | Set Charging Voltage | 2000 V   | Set Divert Valve | Source    |
|             |            | Set Corona           | 4000 nA  | Set APCI Heater  | 450 °C    |

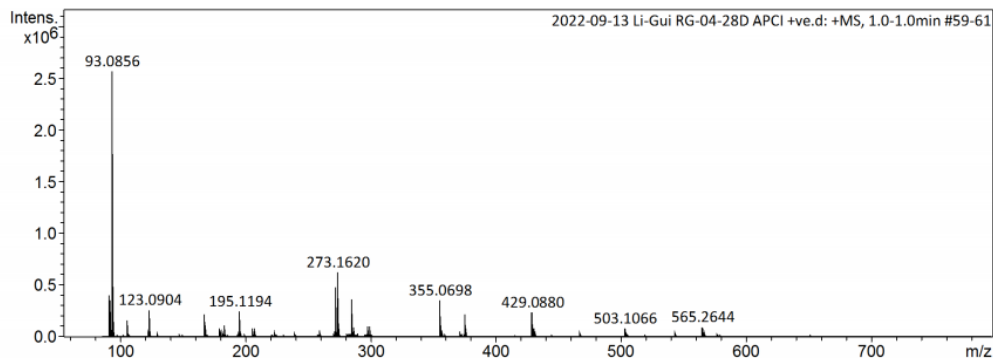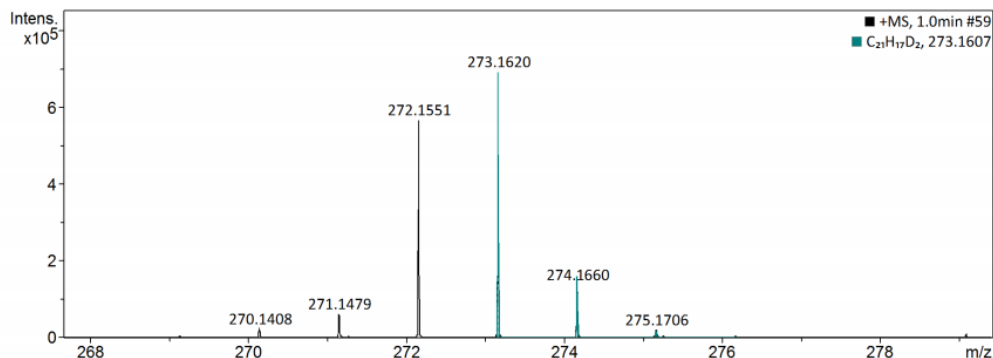

| Meas. m/z | #  | Ion Formula  | m/z      | err [ppm] | mSigma | # mSigma | Score  | rdb  | e <sup>-</sup> Conf | N-Rule |
|-----------|----|--------------|----------|-----------|--------|----------|--------|------|---------------------|--------|
| 272.1551  | 1  | C21H18D      | 272.1544 | -2.6      | 467.9  | 1        | 100.00 | 12.5 | even                | ok     |
|           | 2  | C21H16D2     | 272.1529 | -8.3      | 468.0  | 2        | 34.87  | 13.0 | odd                 | ok     |
|           | 3  | C13H12D3N7   | 272.1572 | 7.6       | 503.2  | 3        | 0.04   | 10.0 | odd                 | ok     |
|           | 4  | C14H18D3O5   | 272.1572 | 7.6       | 509.0  | 4        | 0.01   | 4.5  | even                | ok     |
|           | 5  | C12H18D2N3O4 | 272.1574 | 8.3       | 515.5  | 5        | 0.00   | 4.5  | even                | ok     |
|           | 6  | C12H16D3N3O4 | 272.1558 | 2.6       | 515.6  | 6        | 0.01   | 5.0  | odd                 | ok     |
|           | 7  | C10H18DN6O3  | 272.1576 | 9.1       | 522.0  | 7        | 0.00   | 4.5  | even                | ok     |
|           | 8  | C10H16D2N6O3 | 272.1560 | 3.4       | 522.2  | 8        | 0.00   | 5.0  | odd                 | ok     |
|           | 9  | C10H14D3N6O3 | 272.1545 | -2.3      | 522.3  | 9        | 0.00   | 5.5  | even                | ok     |
|           | 10 | C8H16DN9O2   | 272.1562 | 4.1       | 528.7  | 10       | 0.00   | 5.0  | odd                 | ok     |

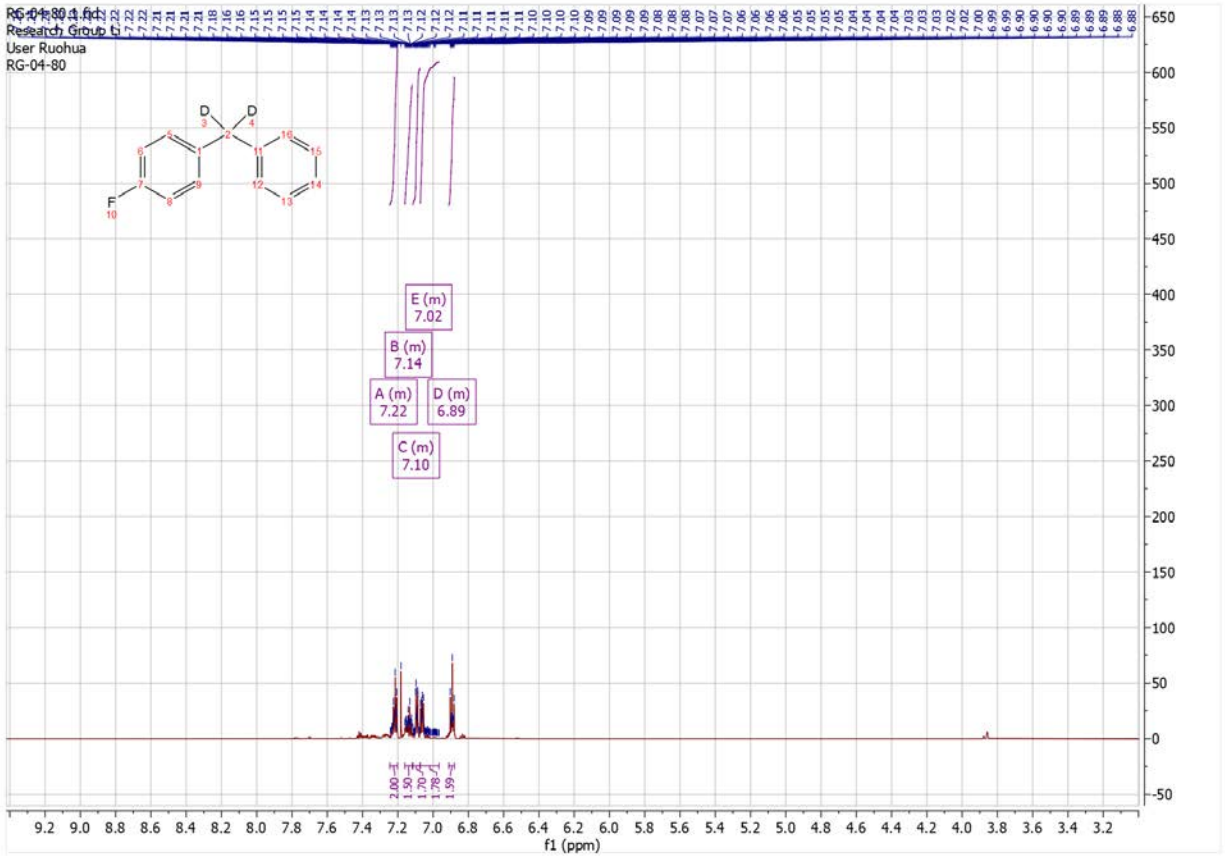

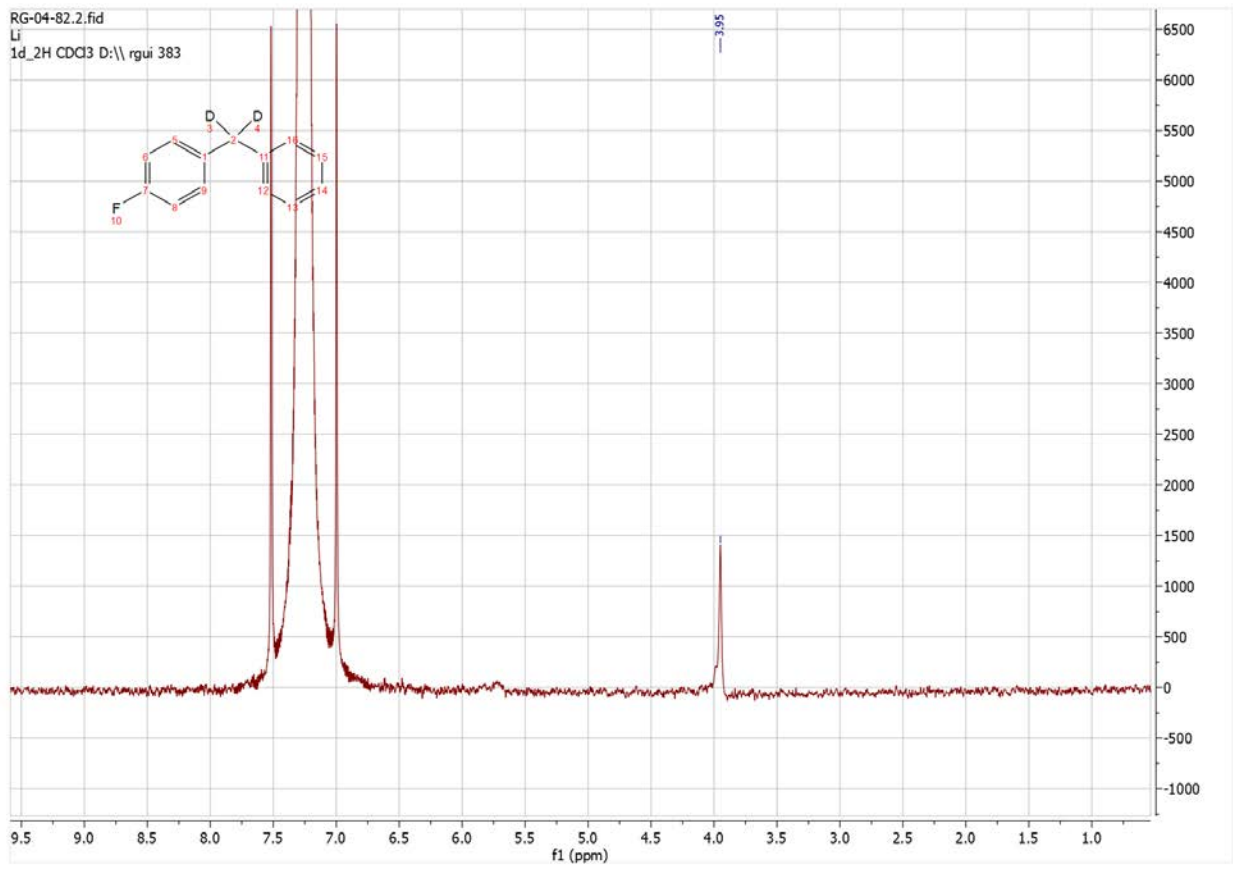

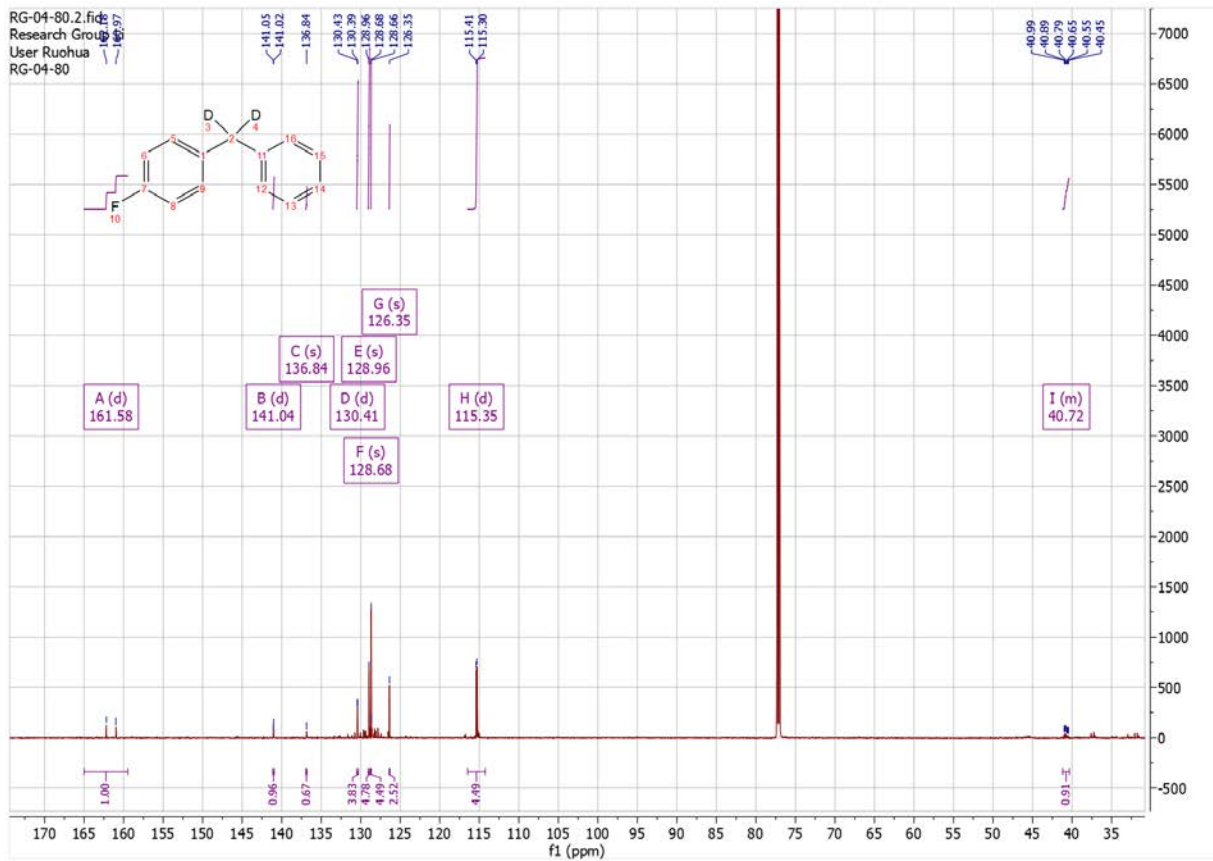

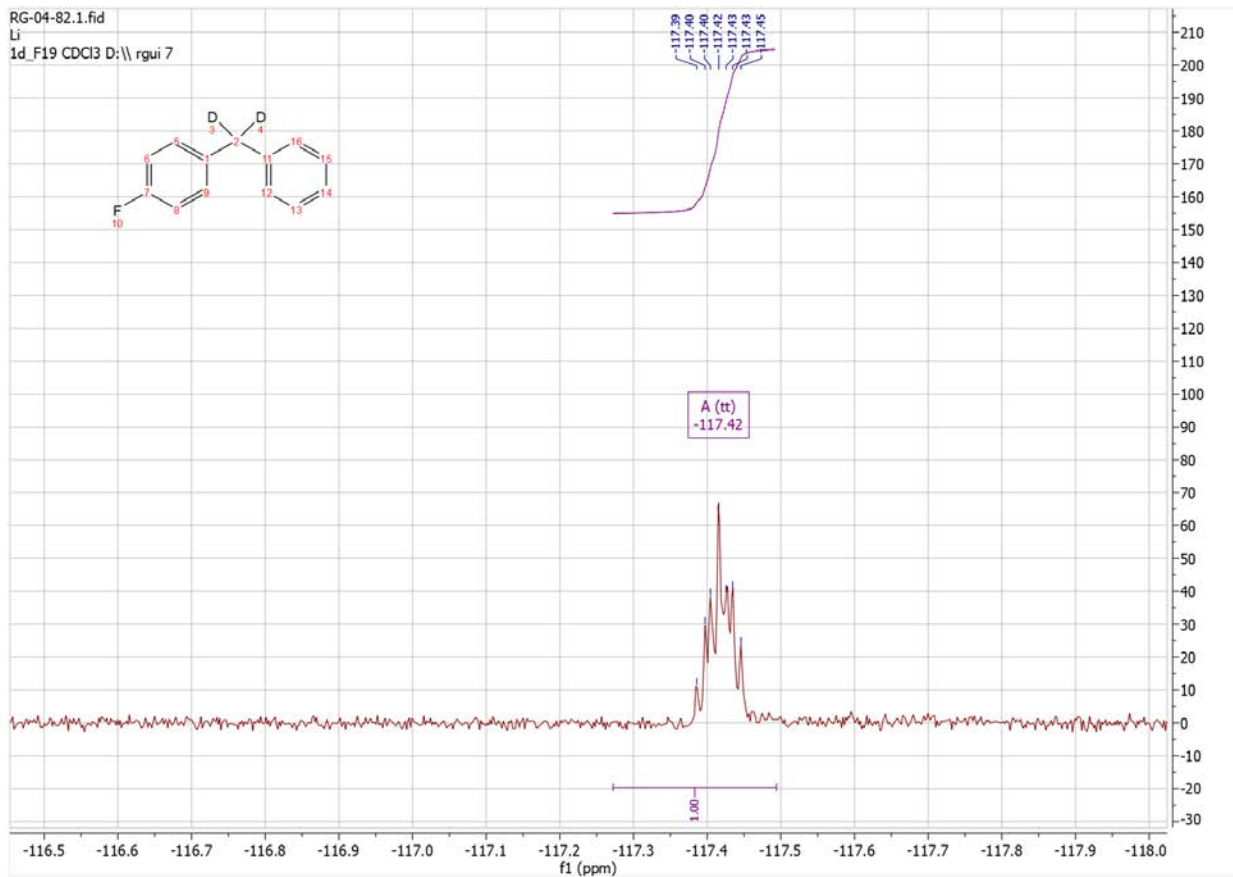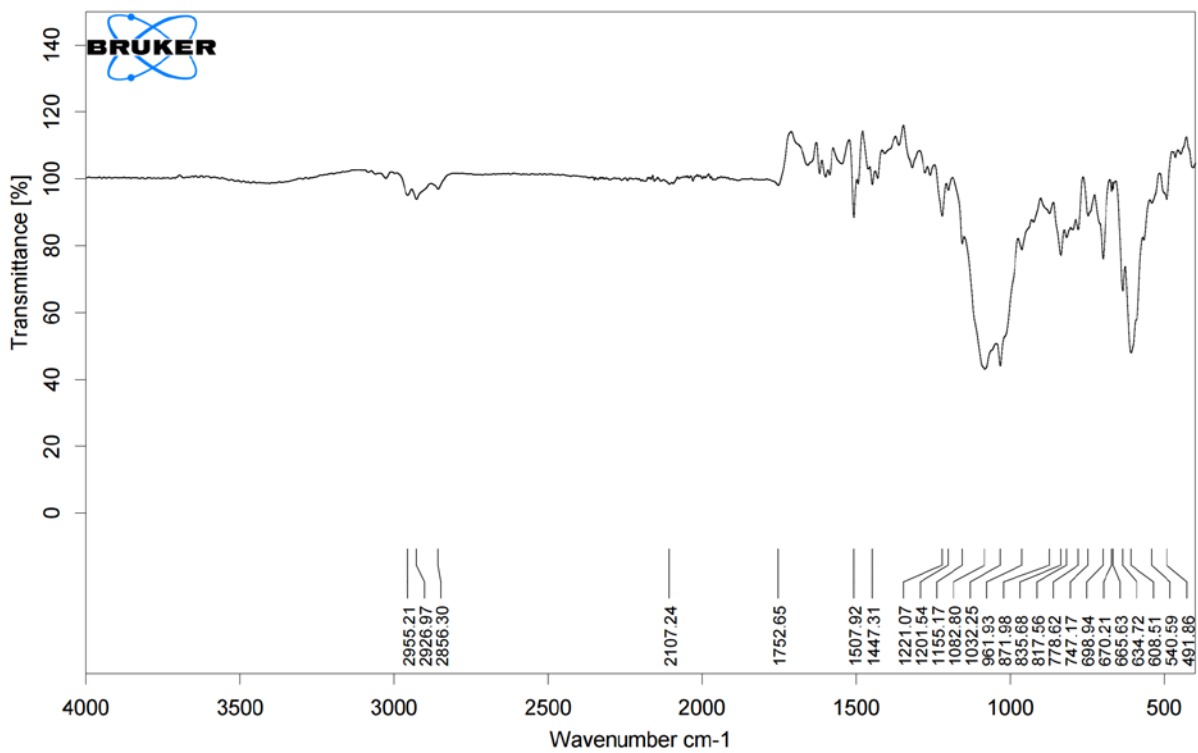

221109-07APCI- HRMS-Li-Ruohua Gui-RG-04-82 #254-276 RT: 0.61-0.66 AV: 23 NL: 1.90E9  
T: FTMS + p APCI corona Full ms[150.0000-500.0000]

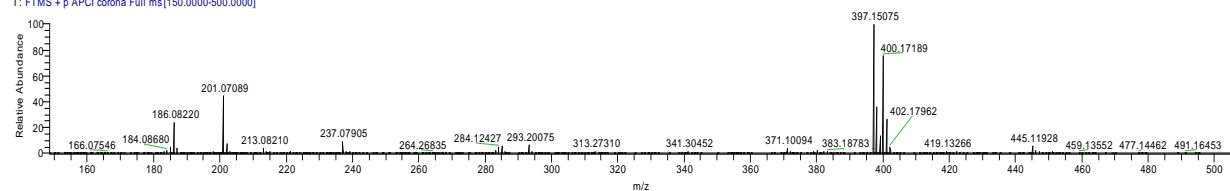

221109-07APCI- HRMS-Li-Ruohua Gui-RG-04-82 #325 RT: 0.77 AV: 1 NL: 4.02E7  
T: FTMS + p APCI corona Full ms[150.0000-500.0000]

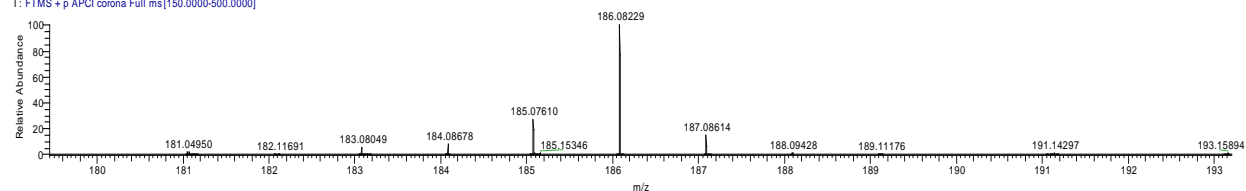

| m/z       | Intensity  | Relative | Resolution | Charge | Theo. Mass | Delta (ppm) | RDB equiv. | Composition                         |
|-----------|------------|----------|------------|--------|------------|-------------|------------|-------------------------------------|
| 186.08229 | 40231092.0 | 100.00   | 41506.00   | 1.00   | 186.08238  | -0.49       | 8.5        | C <sub>13</sub> H <sub>9</sub> 2H F |

| m/z       | Intensity  | Relative | Resolution | Charge | Theo. Mass | Delta (ppm) | RDB equiv. | Composition                       |
|-----------|------------|----------|------------|--------|------------|-------------|------------|-----------------------------------|
| 185.07610 | 10931645.0 | 100.00   | 41702.00   | 0.00   | 185.07611  | -0.05       | 8.5        | C <sub>13</sub> H <sub>10</sub> F |



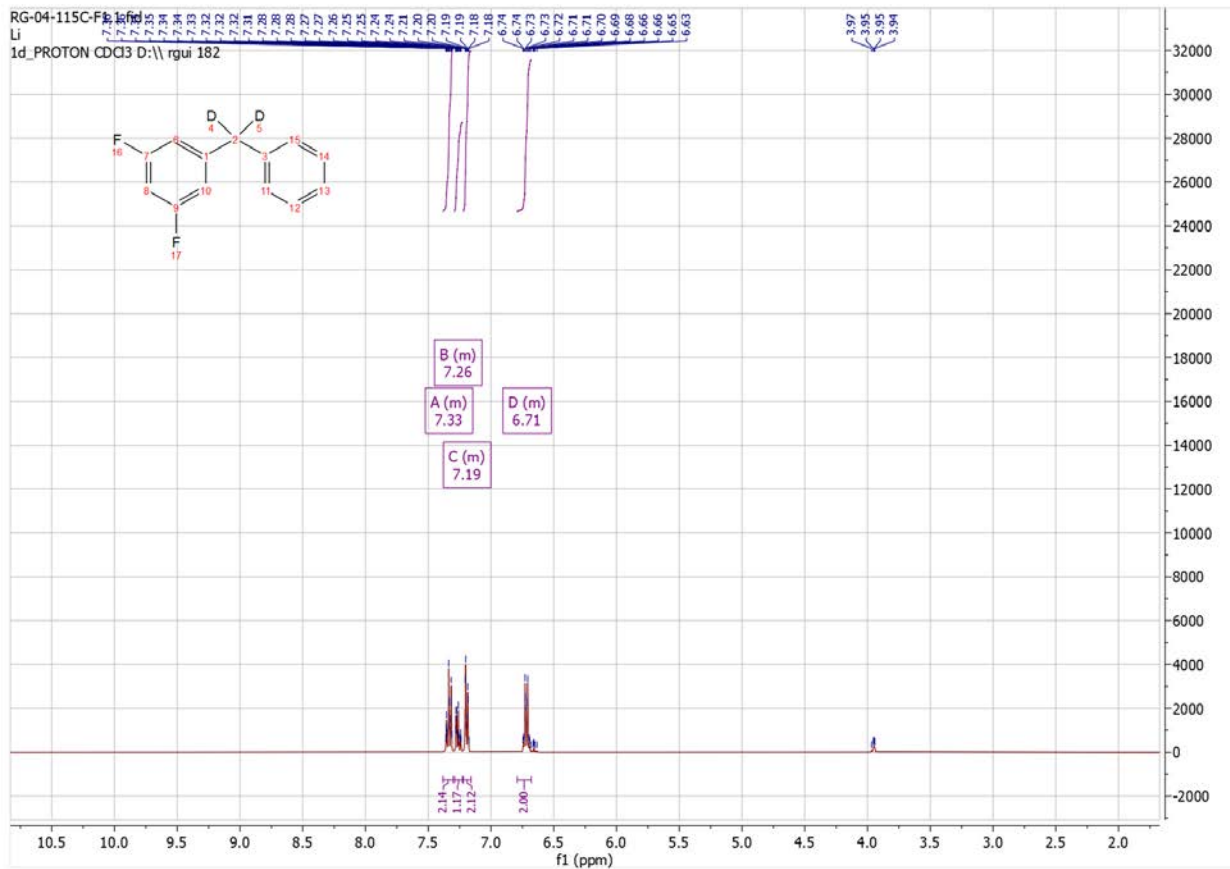

RG-04-115CF1.1.fid  
Li  
1d\_DEUTERIUM CDCI3 D:\\ rgui 51

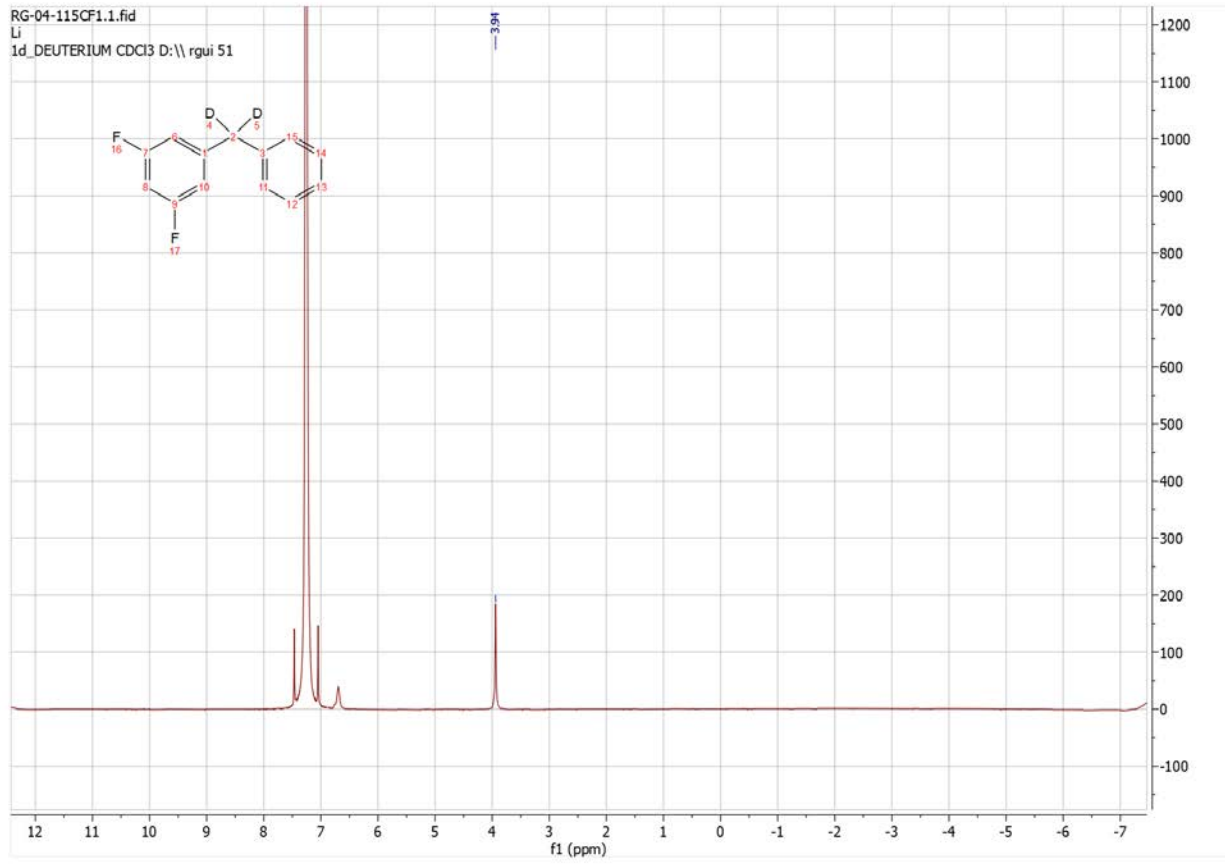

RG-04-115CF1.2.fid  
Li  
Id\_F19CPD CDCl3 D:\rgui 51

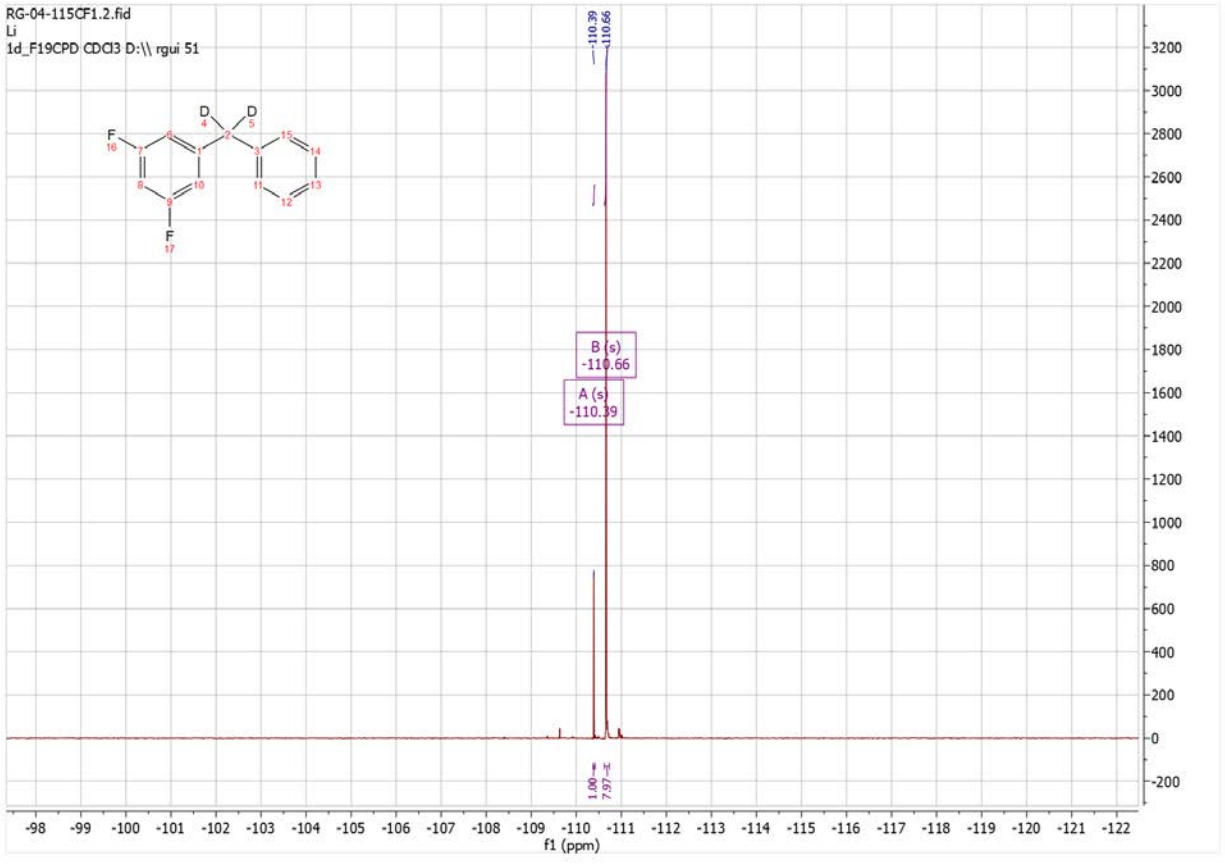

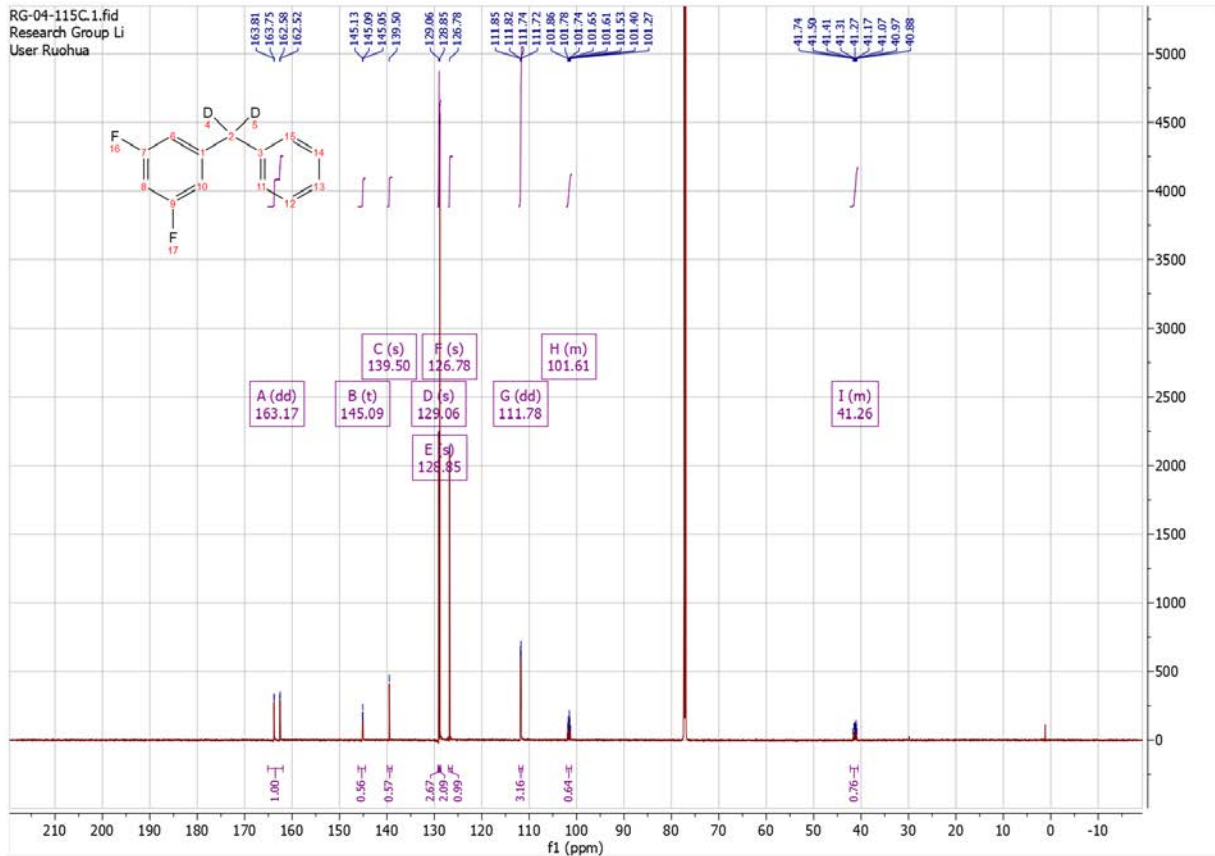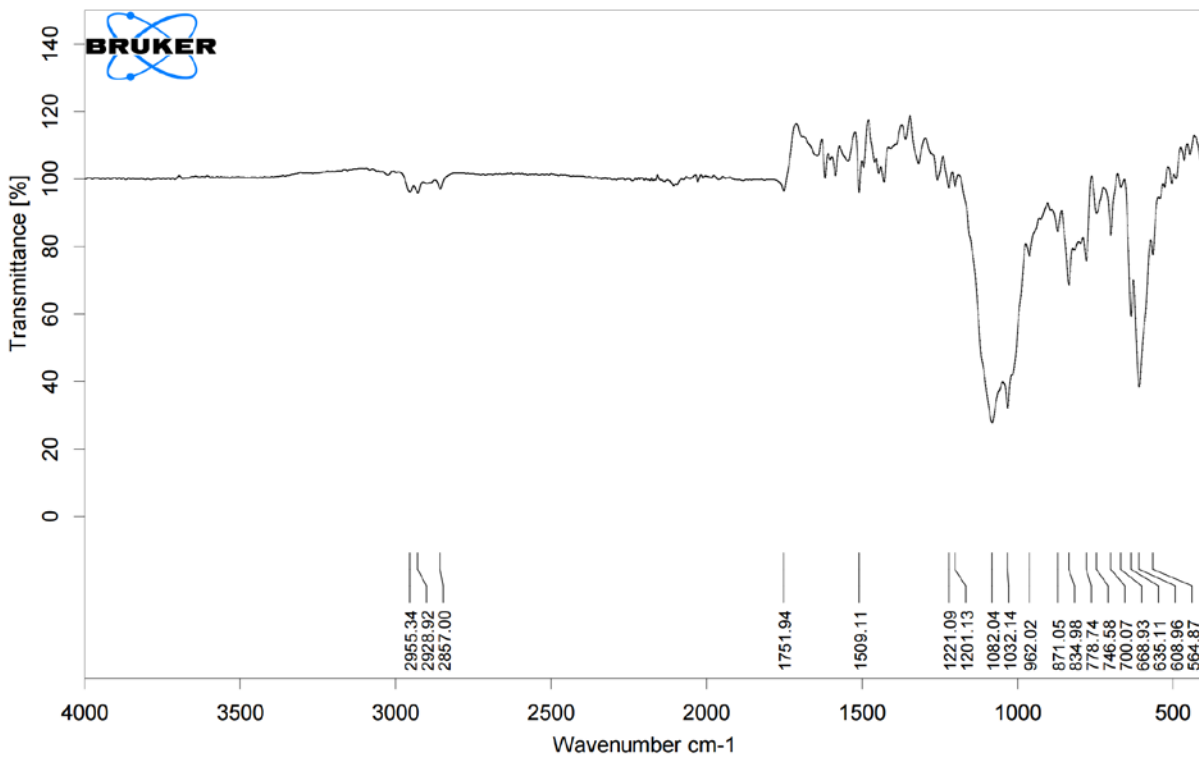

## Mass Spectrum SmartFormula Report

**Analysis Info**

Analysis Name D:\Data\Li\2022-11-28 Li-Gui RG-04-115C APCI +ve.d  
 Method APCI\_Tune\_pos\_Low\_AW Small.m  
 Sample Name 2022-11-28 Li-Gui RG-04-115C APCI +ve  
 Comment

Acquisition Date 11/28/2022 2:42:22 PM  
 Operator Alex  
 Instrument maXis impact 282001.00044

**Acquisition Parameter**

|             |            |                      |          |                  |           |
|-------------|------------|----------------------|----------|------------------|-----------|
| Source Type | APCI       | Ion Polarity         | Positive | Set Nebulizer    | 4.0 Bar   |
| Focus       | Not active | Set Capillary        | 4000 V   | Set Dry Heater   | 150 °C    |
| Scan Begin  | 90 m/z     | Set End Plate Offset | -500 V   | Set Dry Gas      | 1.5 l/min |
| Scan End    | 1250 m/z   | Set Charging Voltage | 2000 V   | Set Divert Valve | Source    |
|             |            | Set Corona           | 4000 nA  | Set APCI Heater  | 450 °C    |

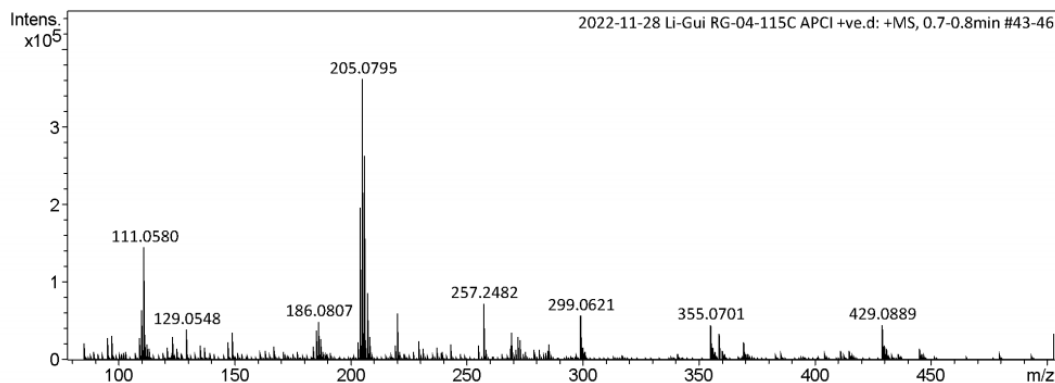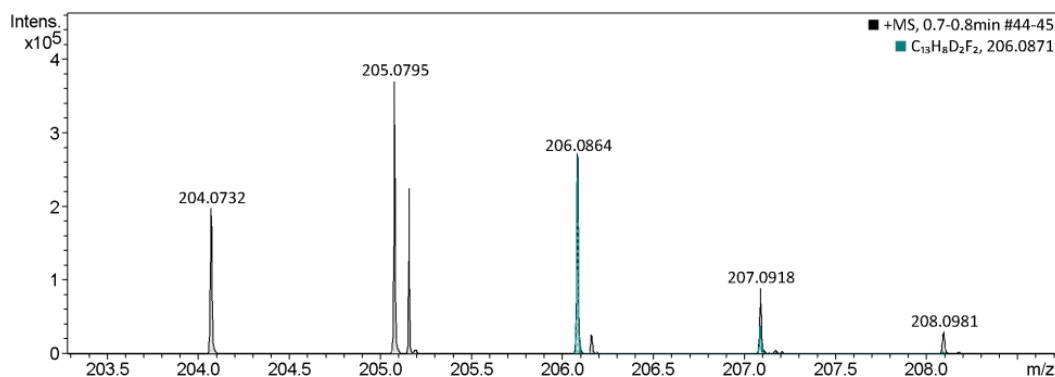

| Meas. m/z | # | Ion Formula                                                                               | m/z      | err [ppm] | mSigma | # mSigma | Score  | rdb | e <sup>-</sup> Conf | N-Rule |
|-----------|---|-------------------------------------------------------------------------------------------|----------|-----------|--------|----------|--------|-----|---------------------|--------|
| 204.0732  | 1 | C <sub>13</sub> H <sub>8</sub> DF <sub>2</sub>                                            | 204.0730 | -1.3      | 699.2  | 1        | 100.00 | 8.5 | even                | ok     |
| 205.0795  | 1 | C <sub>13</sub> H <sub>7</sub> D <sub>2</sub> F <sub>2</sub>                              | 205.0792 | -1.5      | 361.2  | 1        | 100.00 | 8.5 | even                | ok     |
| 206.0864  | 1 | C <sub>13</sub> H <sub>8</sub> D <sub>2</sub> F <sub>2</sub>                              | 206.0871 | 3.3       | 123.4  | 1        | 100.00 | 8.0 | odd                 | ok     |
|           | 2 | C <sub>8</sub> H <sub>12</sub> F <sub>2</sub> N <sub>2</sub> O <sub>2</sub>               | 206.0861 | -1.2      | 147.4  | 2        | 28.77  | 3.0 | odd                 | ok     |
| 207.0918  | 1 | C <sub>8</sub> H <sub>11</sub> DF <sub>2</sub> N <sub>2</sub> O <sub>2</sub>              | 207.0924 | 3.1       | 140.5  | 1        | 100.00 | 3.0 | odd                 | ok     |
|           | 2 | C <sub>8</sub> H <sub>9</sub> D <sub>2</sub> F <sub>2</sub> N <sub>2</sub> O <sub>2</sub> | 207.0909 | -4.4      | 140.7  | 2        | 86.70  | 3.5 | even                | ok     |
|           | 3 | C <sub>6</sub> H <sub>11</sub> F <sub>2</sub> N <sub>5</sub> O                            | 207.0926 | 4.1       | 147.1  | 3        | 59.06  | 3.0 | odd                 | ok     |
|           | 4 | C <sub>6</sub> H <sub>9</sub> DF <sub>2</sub> N <sub>5</sub> O                            | 207.0911 | -3.4      | 147.3  | 4        | 63.65  | 3.5 | even                | ok     |
|           | 5 | C <sub>4</sub> H <sub>9</sub> F <sub>2</sub> N <sub>8</sub>                               | 207.0913 | -2.4      | 148.5  | 5        | 65.13  | 3.5 | even                | ok     |

20221126\_RG-04-115D-F4-PROTON\_01  
RG-04-115D-F4

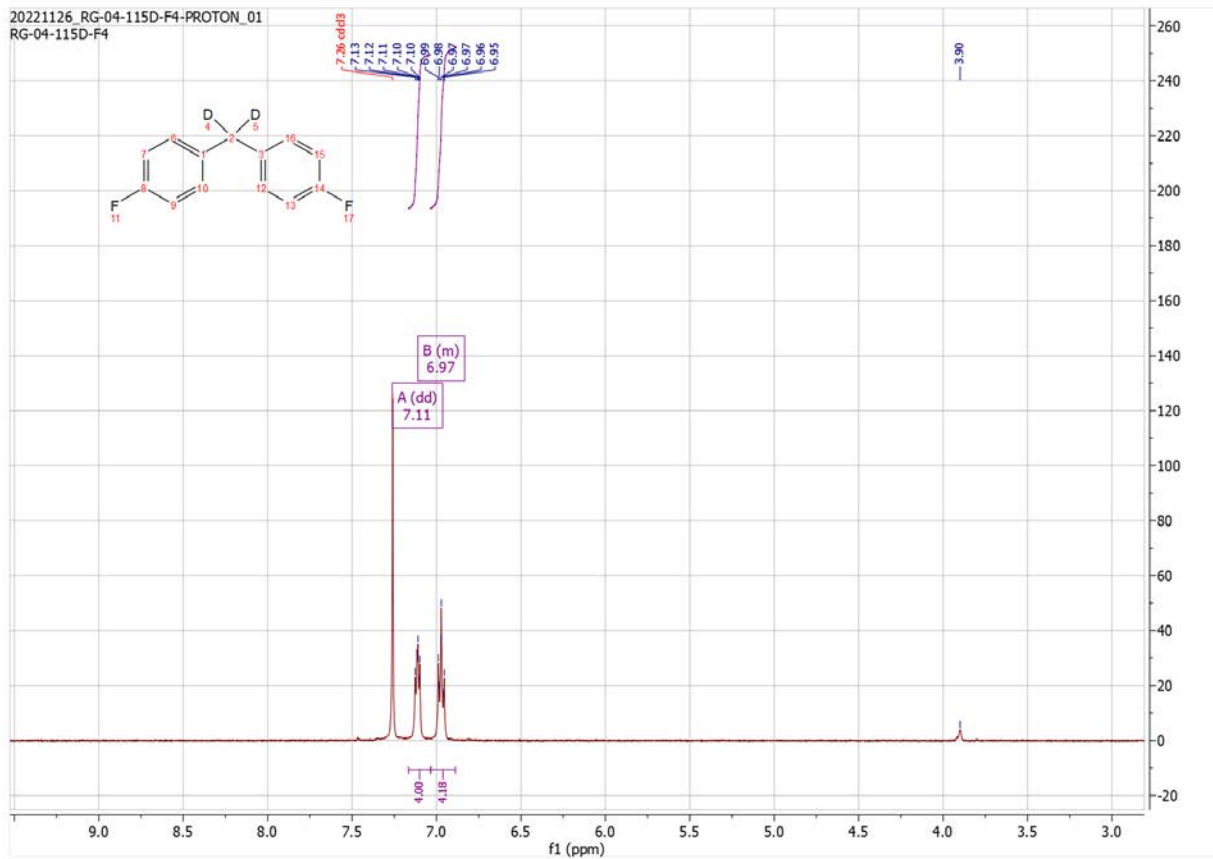

RG-04-115DF4.1.fid  
Li  
1d\_DEUTERIUM CDCl3 D:\rgui-49

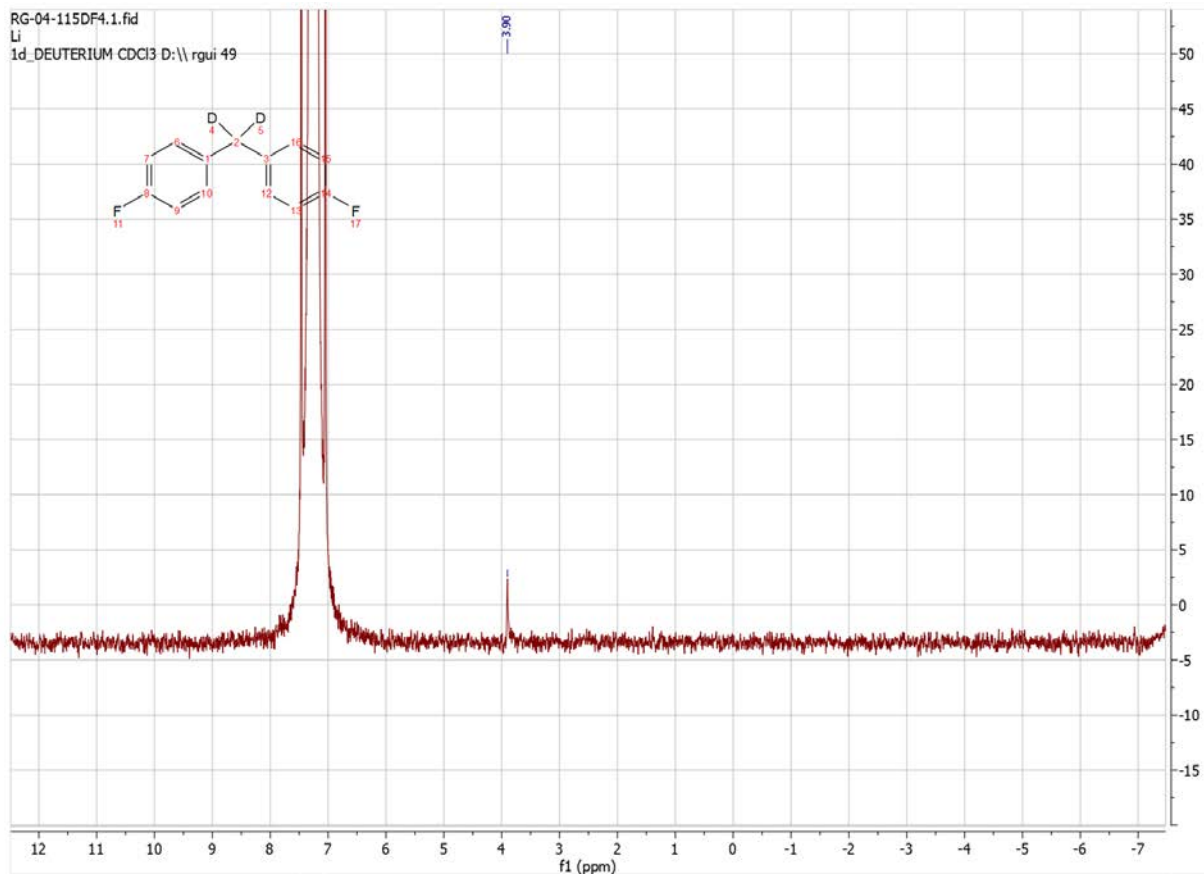

RG-04-115D.2.fid  
Research Group Li  
User Ruchua

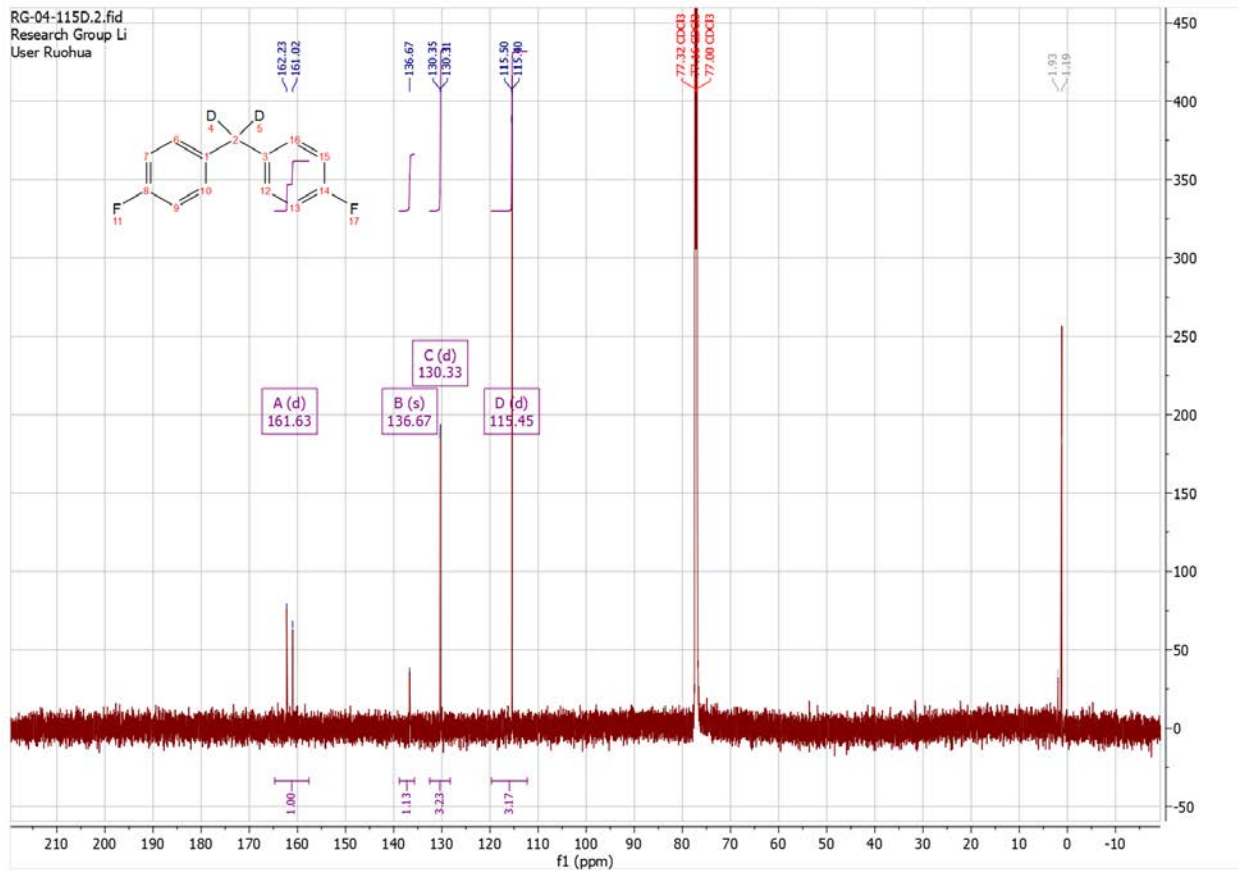



RG-04-115DF4.2.fid  
Li  
1d\_F19CPD CDCl3 D:\rgui 49

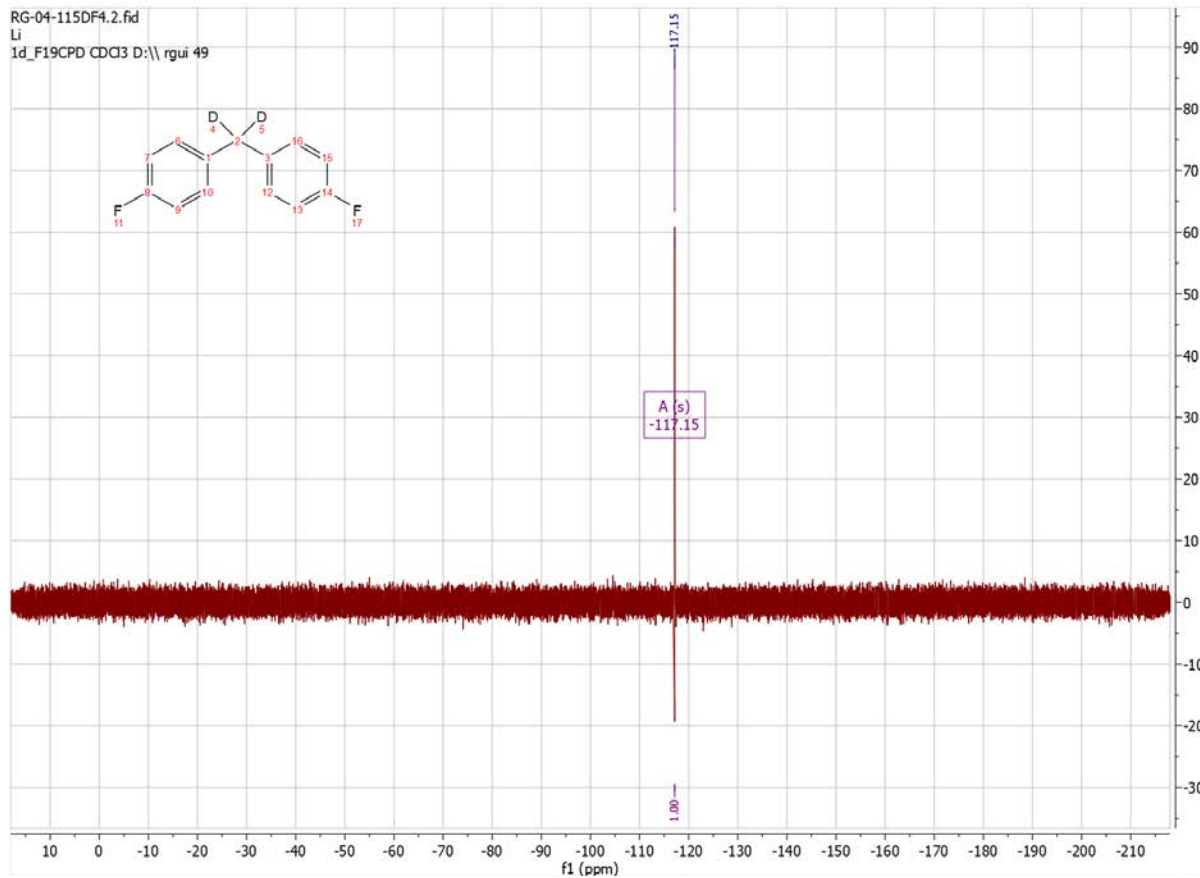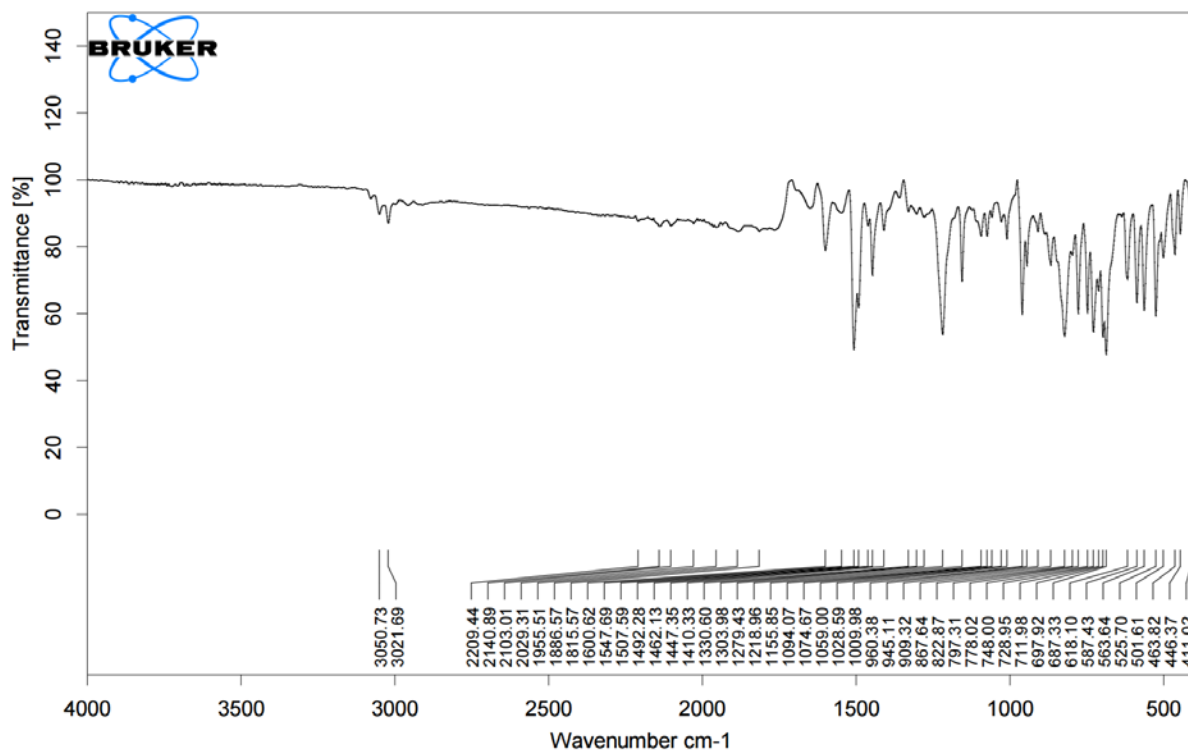

# Mass Spectrum SmartFormula Report

**Analysis Info**

Analysis Name D:\Data\Li\2022-11-28 Li-Gui RG-04-115C APCI +ve.d  
 Method APCI\_Tune\_pos\_Low\_AW Small.m  
 Sample Name 2022-11-28 Li-Gui RG-04-115C APCI +ve  
 Comment

Acquisition Date 11/28/2022 2:42:22 PM  
 Operator Alex  
 Instrument maXis impact 282001.00044

**Acquisition Parameter**

|             |            |                      |          |                  |           |
|-------------|------------|----------------------|----------|------------------|-----------|
| Source Type | APCI       | Ion Polarity         | Positive | Set Nebulizer    | 4.0 Bar   |
| Focus       | Not active | Set Capillary        | 4000 V   | Set Dry Heater   | 150 °C    |
| Scan Begin  | 90 m/z     | Set End Plate Offset | -500 V   | Set Dry Gas      | 1.5 l/min |
| Scan End    | 1250 m/z   | Set Charging Voltage | 2000 V   | Set Divert Valve | Source    |
|             |            | Set Corona           | 4000 nA  | Set APCI Heater  | 450 °C    |

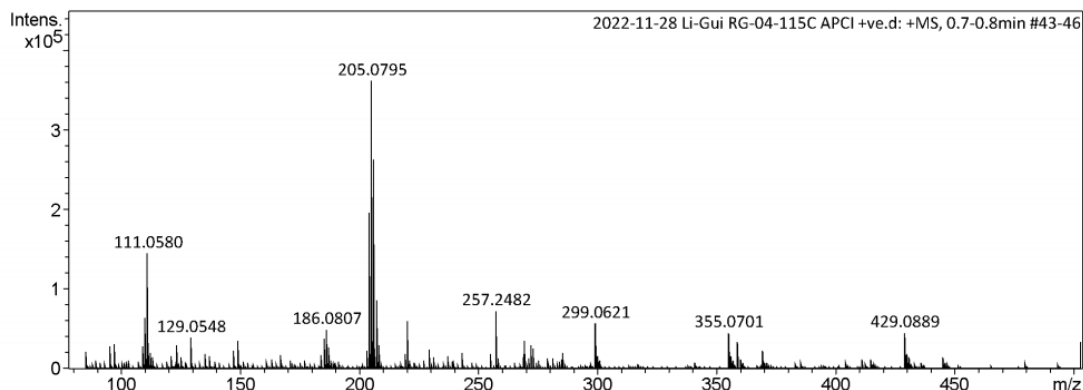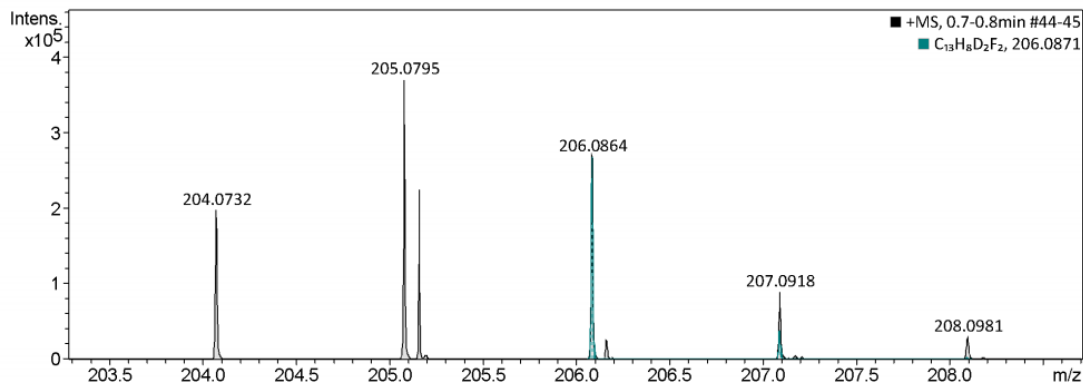

| Meas. m/z | # | Ion Formula                                                                               | m/z      | err [ppm] | mSigma | # mSigma | Score  | rdb | e <sup>-</sup> Conf | N-Rule |
|-----------|---|-------------------------------------------------------------------------------------------|----------|-----------|--------|----------|--------|-----|---------------------|--------|
| 204.0732  | 1 | C <sub>13</sub> H <sub>8</sub> DF <sub>2</sub>                                            | 204.0730 | -1.3      | 699.2  | 1        | 100.00 | 8.5 | even                | ok     |
| 205.0795  | 1 | C <sub>13</sub> H <sub>7</sub> D <sub>2</sub> F <sub>2</sub>                              | 205.0792 | -1.5      | 361.2  | 1        | 100.00 | 8.5 | even                | ok     |
| 206.0864  | 1 | C <sub>13</sub> H <sub>8</sub> D <sub>2</sub> F <sub>2</sub>                              | 206.0871 | 3.3       | 123.4  | 1        | 100.00 | 8.0 | odd                 | ok     |
|           | 2 | C <sub>8</sub> H <sub>12</sub> F <sub>2</sub> N <sub>2</sub> O <sub>2</sub>               | 206.0861 | -1.2      | 147.4  | 2        | 28.77  | 3.0 | odd                 | ok     |
| 207.0918  | 1 | C <sub>8</sub> H <sub>11</sub> DF <sub>2</sub> N <sub>2</sub> O <sub>2</sub>              | 207.0924 | 3.1       | 140.5  | 1        | 100.00 | 3.0 | odd                 | ok     |
|           | 2 | C <sub>8</sub> H <sub>9</sub> D <sub>2</sub> F <sub>2</sub> N <sub>2</sub> O <sub>2</sub> | 207.0909 | -4.4      | 140.7  | 2        | 86.70  | 3.5 | even                | ok     |
|           | 3 | C <sub>6</sub> H <sub>11</sub> F <sub>2</sub> N <sub>5</sub> O                            | 207.0926 | 4.1       | 147.1  | 3        | 59.06  | 3.0 | odd                 | ok     |
|           | 4 | C <sub>6</sub> H <sub>9</sub> DF <sub>2</sub> N <sub>5</sub> O                            | 207.0911 | -3.4      | 147.3  | 4        | 63.65  | 3.5 | even                | ok     |
|           | 5 | C <sub>4</sub> H <sub>9</sub> F <sub>2</sub> N <sub>8</sub>                               | 207.0913 | -2.4      | 148.5  | 5        | 65.13  | 3.5 | even                | ok     |

RG-04-119F27\_PROTON\_01  
RG-04-119F27

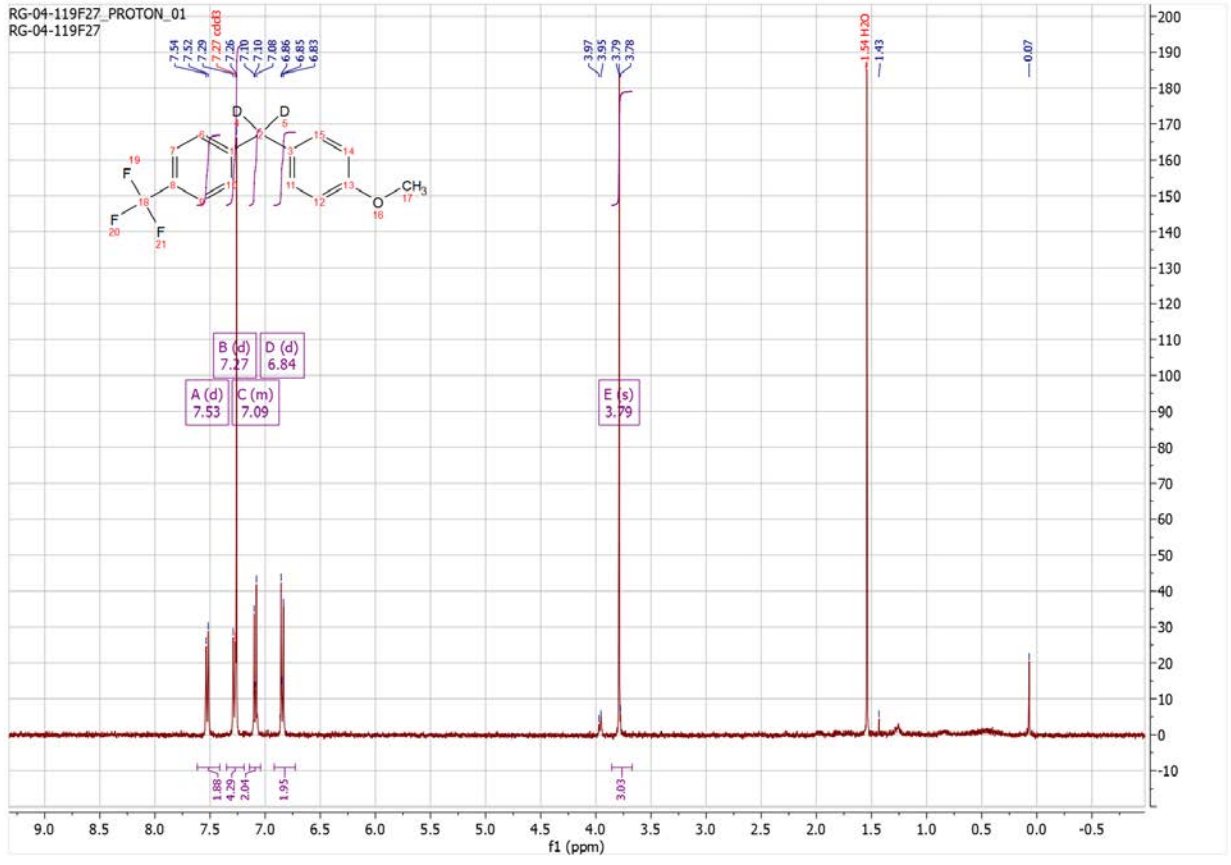

RG-04-119A-F27.1.fid  
Li  
1d\_2H CDC3 D:\ rgui 356

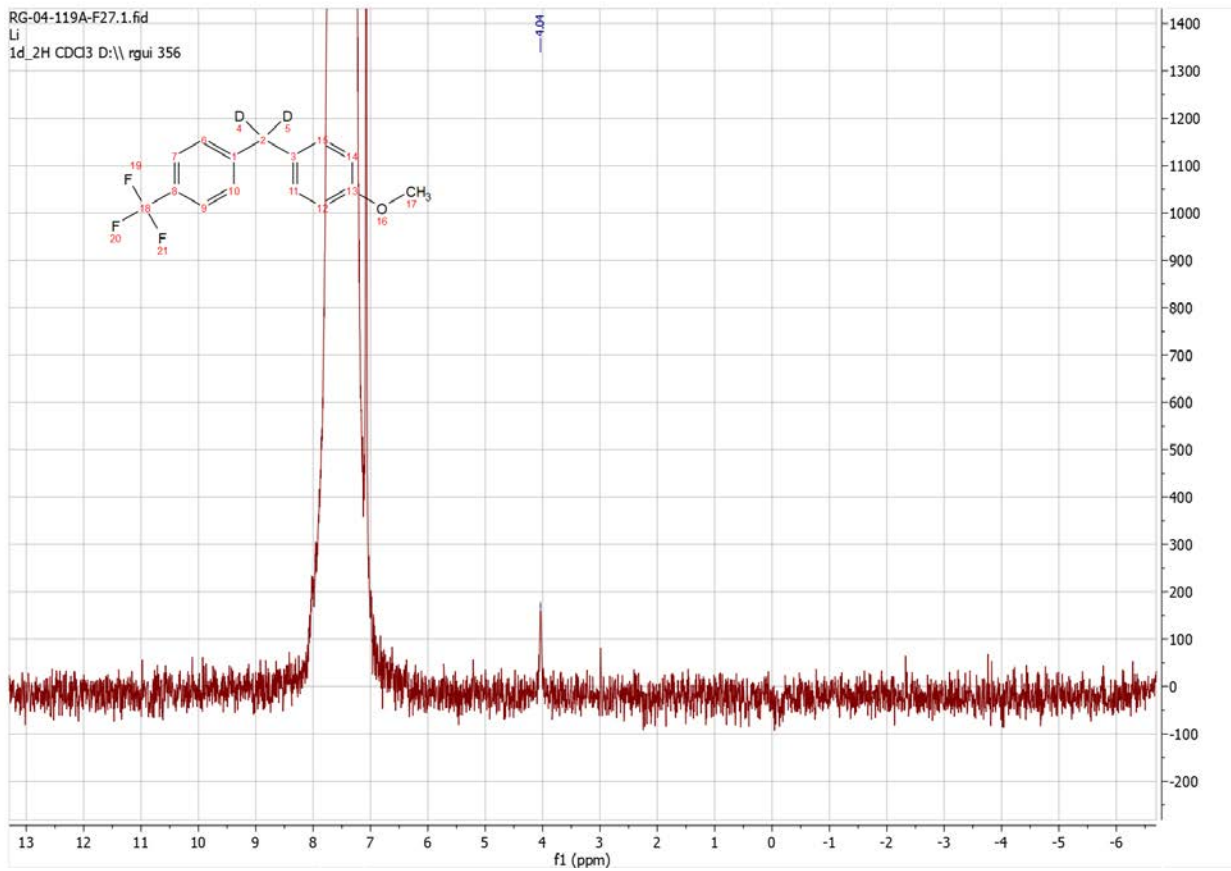

RG-04-119F27 FLUORINE\_01  
RG-04-119F27

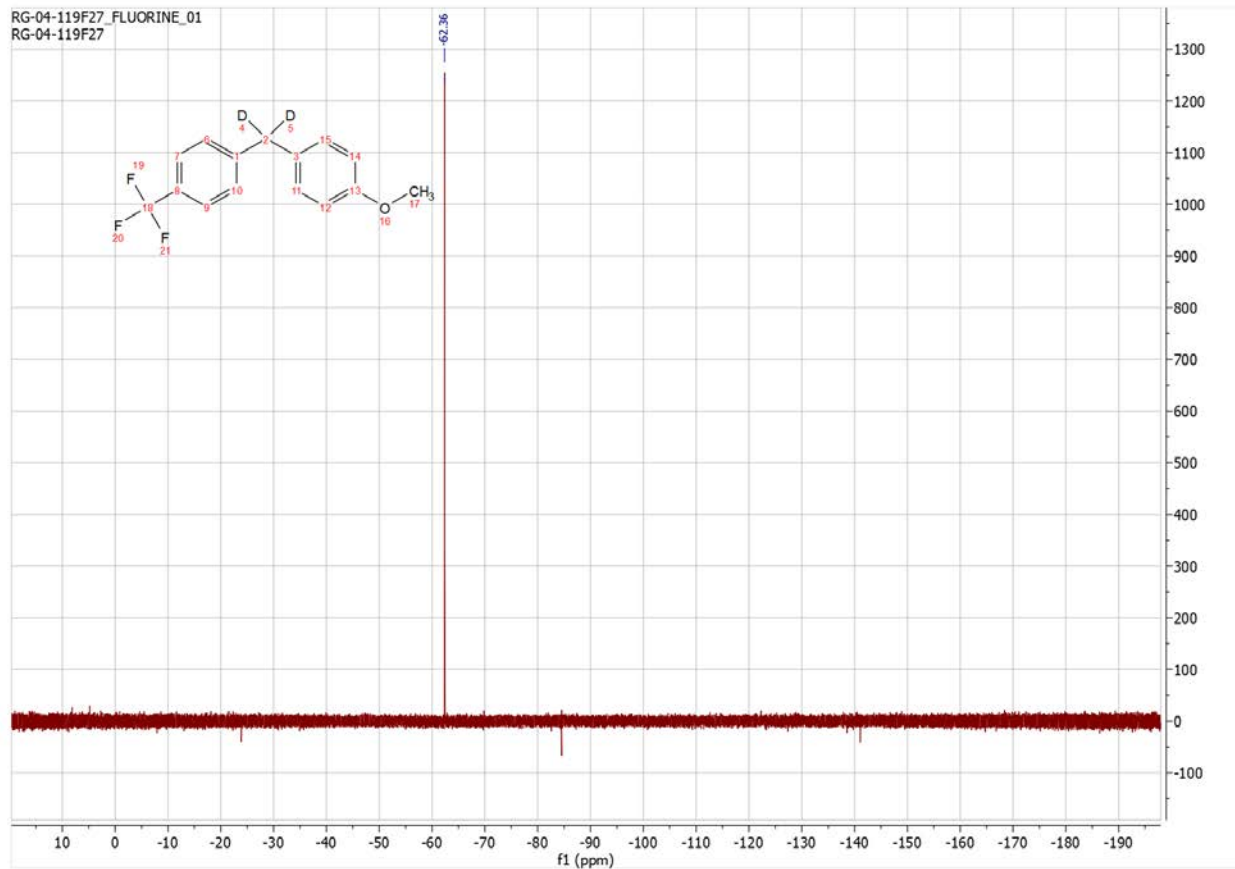

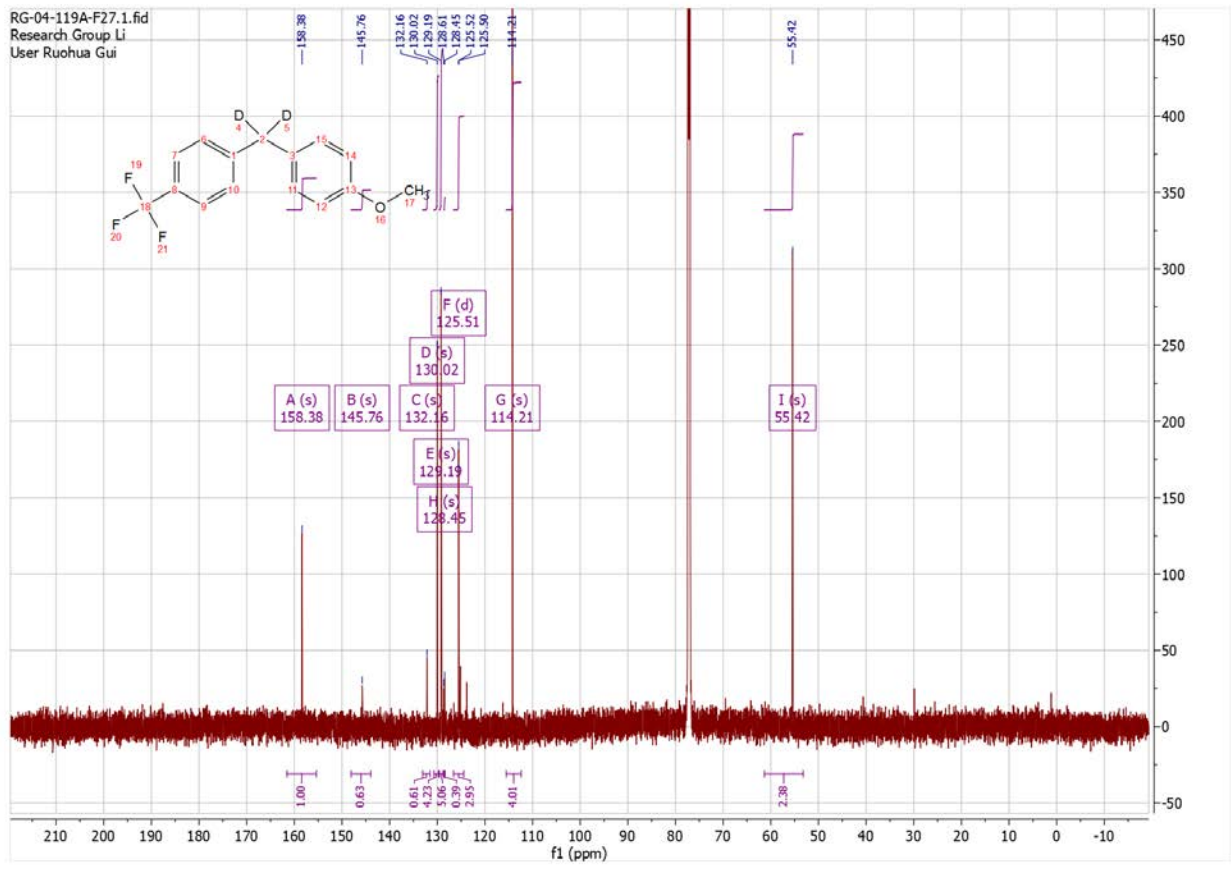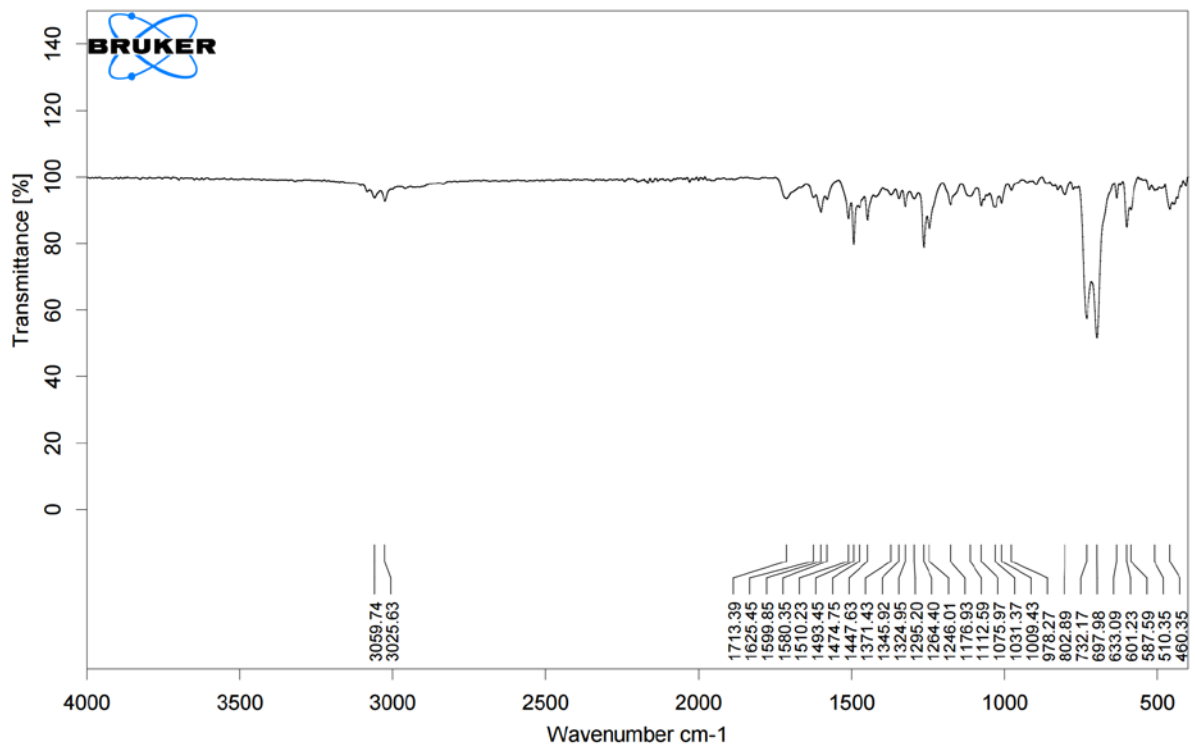

# Mass Spectrum SmartFormula Report

**Analysis Info**

Analysis Name D:\Data\Li\2022-12-02 Li-Gui RG-04-119A APCI +ve.d  
 Method APCI\_Tune\_pos\_Low\_AW Small.m  
 Sample Name 2022-12-02 Li-Gui RG-04-119A APCI +ve  
 Comment

Acquisition Date 12/2/2022 10:17:32 AM

Operator Alex  
 Instrument maXis impact 282001.00044

**Acquisition Parameter**

|             |            |                      |          |                  |           |
|-------------|------------|----------------------|----------|------------------|-----------|
| Source Type | APCI       | Ion Polarity         | Positive | Set Nebulizer    | 4.0 Bar   |
| Focus       | Not active | Set Capillary        | 4000 V   | Set Dry Heater   | 150 °C    |
| Scan Begin  | 90 m/z     | Set End Plate Offset | -500 V   | Set Dry Gas      | 1.5 l/min |
| Scan End    | 1250 m/z   | Set Charging Voltage | 2000 V   | Set Divert Valve | Source    |
|             |            | Set Corona           | 4000 nA  | Set APCI Heater  | 450 °C    |

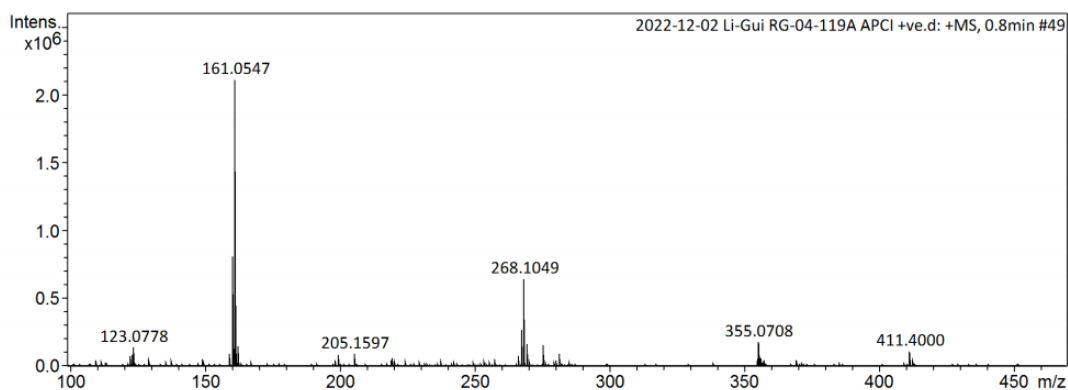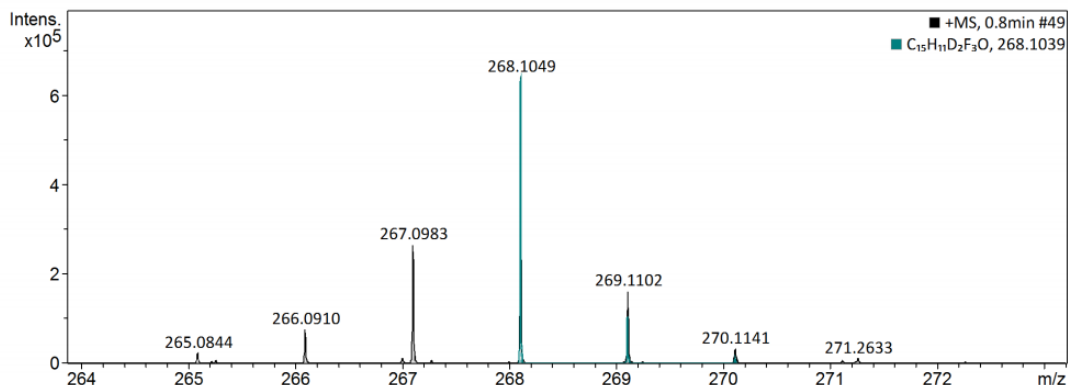

| Meas. m/z | # | Ion Formula                                                                                | m/z      | err [ppm] | mSigma | # mSigma | Score  | rdb | e <sup>-</sup> Conf | N-Rule |
|-----------|---|--------------------------------------------------------------------------------------------|----------|-----------|--------|----------|--------|-----|---------------------|--------|
| 267.0983  | 1 | C <sub>15</sub> H <sub>14</sub> F <sub>3</sub> O                                           | 267.0991 | 3.0       | 605.0  | 1        | 99.92  | 7.5 | even                | ok     |
|           | 2 | C <sub>15</sub> H <sub>12</sub> DF <sub>3</sub> O                                          | 267.0976 | -2.8      | 605.1  | 2        | 100.00 | 8.0 | odd                 | ok     |
|           | 3 | C <sub>13</sub> H <sub>12</sub> F <sub>3</sub> N <sub>3</sub>                              | 267.0978 | -2.0      | 610.7  | 3        | 28.30  | 8.0 | odd                 | ok     |
|           | 4 | C <sub>4</sub> H <sub>10</sub> D <sub>2</sub> F <sub>3</sub> N <sub>6</sub> O <sub>4</sub> | 267.0992 | 3.3       | 650.8  | 4        | 0.00   | 0.5 | even                | ok     |
| 268.1049  | 1 | C <sub>15</sub> H <sub>13</sub> DF <sub>3</sub> O                                          | 268.1054 | 1.8       | 53.6   | 1        | 100.00 | 7.5 | even                | ok     |
|           | 2 | C <sub>15</sub> H <sub>11</sub> D <sub>2</sub> F <sub>3</sub> O                            | 268.1039 | -4.0      | 53.7   | 2        | 73.48  | 8.0 | odd                 | ok     |
|           | 3 | C <sub>13</sub> H <sub>13</sub> F <sub>3</sub> N <sub>3</sub>                              | 268.1056 | 2.6       | 60.3   | 3        | 72.44  | 7.5 | even                | ok     |
|           | 4 | C <sub>13</sub> H <sub>11</sub> DF <sub>3</sub> N <sub>3</sub>                             | 268.1041 | -3.2      | 60.4   | 4        | 66.18  | 8.0 | odd                 | ok     |
| 269.1102  | 1 | C <sub>15</sub> H <sub>12</sub> D <sub>2</sub> F <sub>3</sub> O                            | 269.1117 | 5.7       | 20.5   | 1        | 56.01  | 7.5 | even                | ok     |
|           | 2 | C <sub>13</sub> H <sub>12</sub> DF <sub>3</sub> N <sub>3</sub>                             | 269.1119 | 6.4       | 27.2   | 2        | 41.79  | 7.5 | even                | ok     |

RG-04-90F2.1.fid  
Research Group Li  
User ruohua

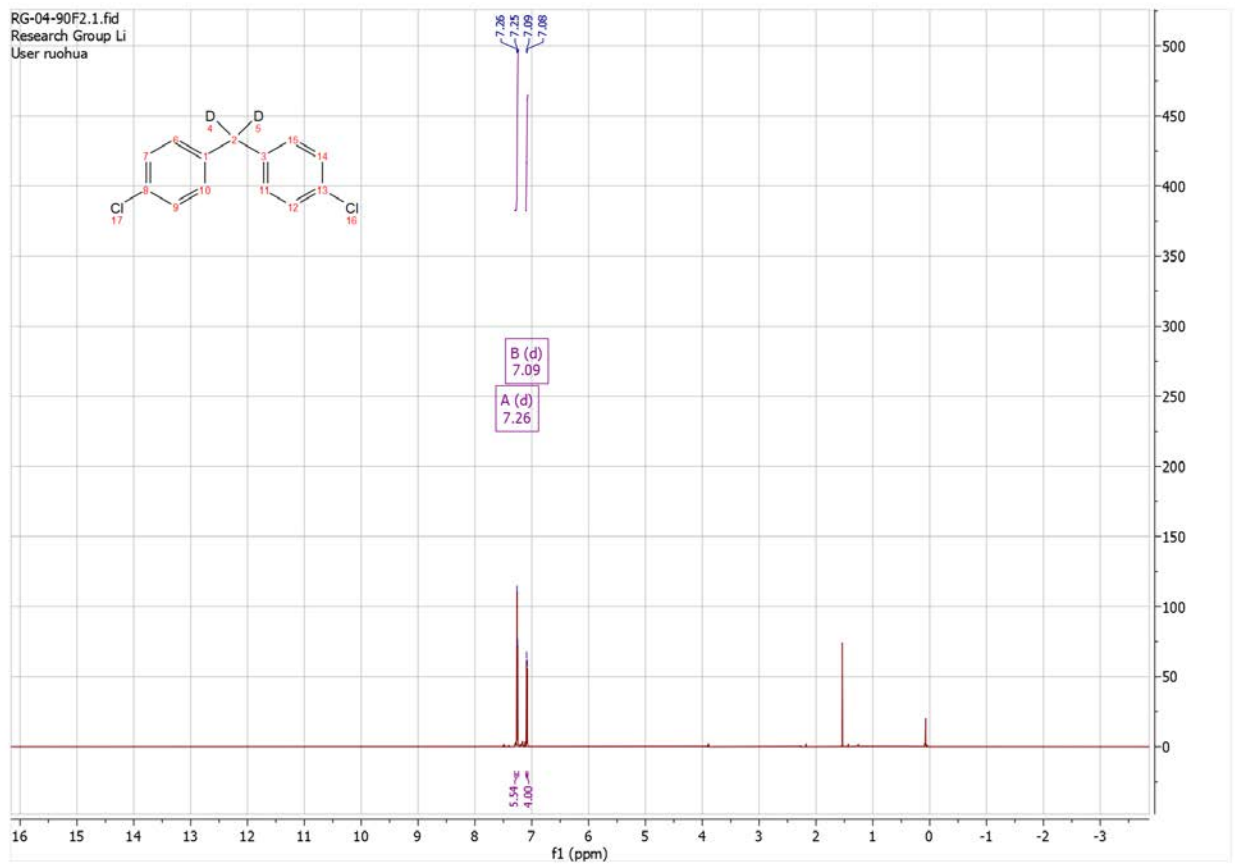



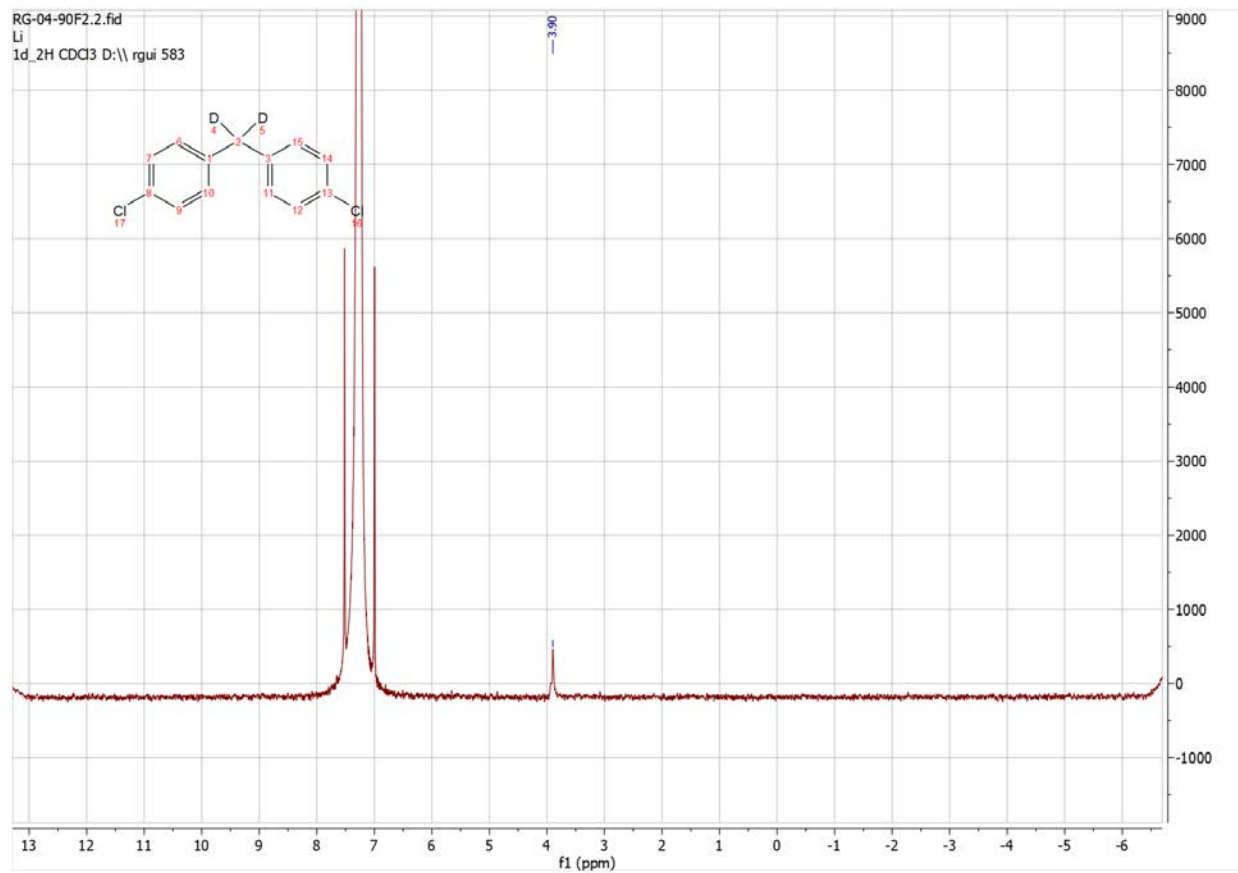

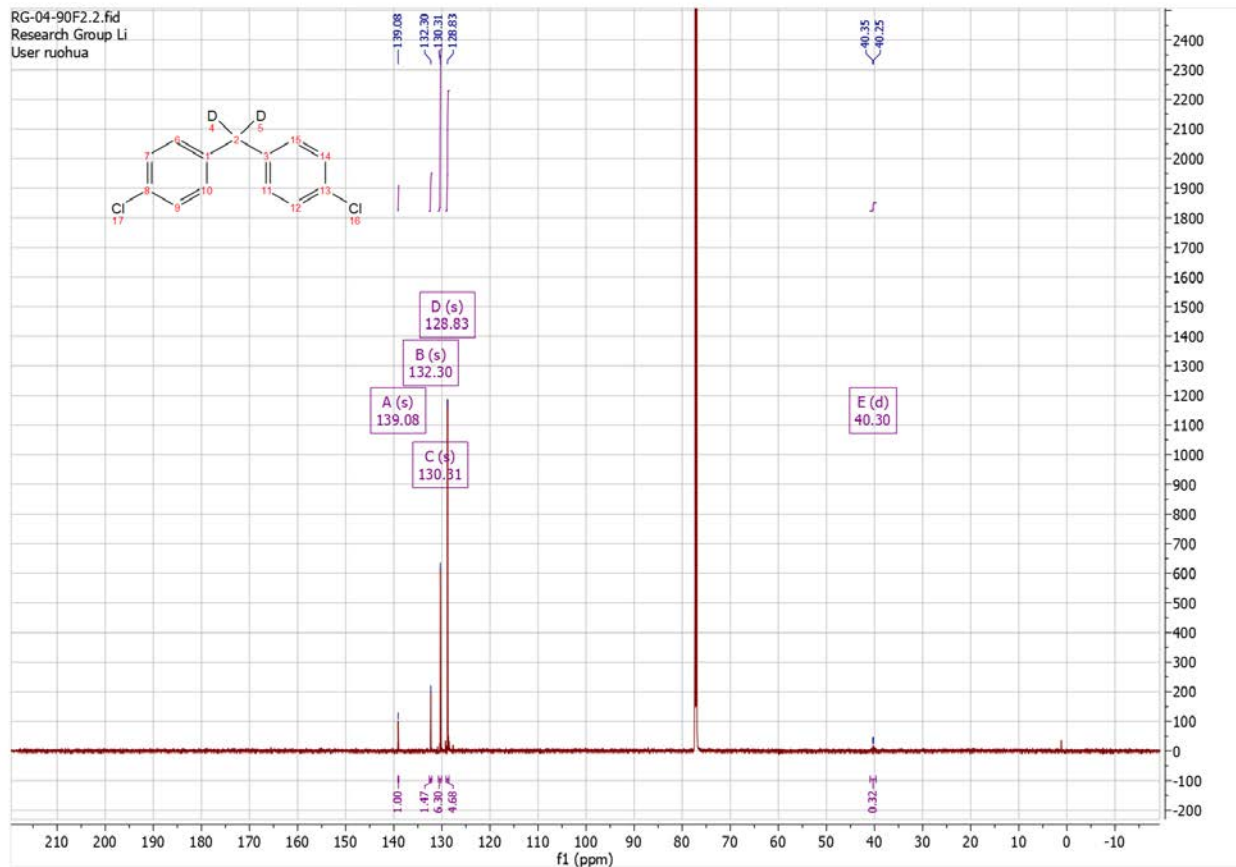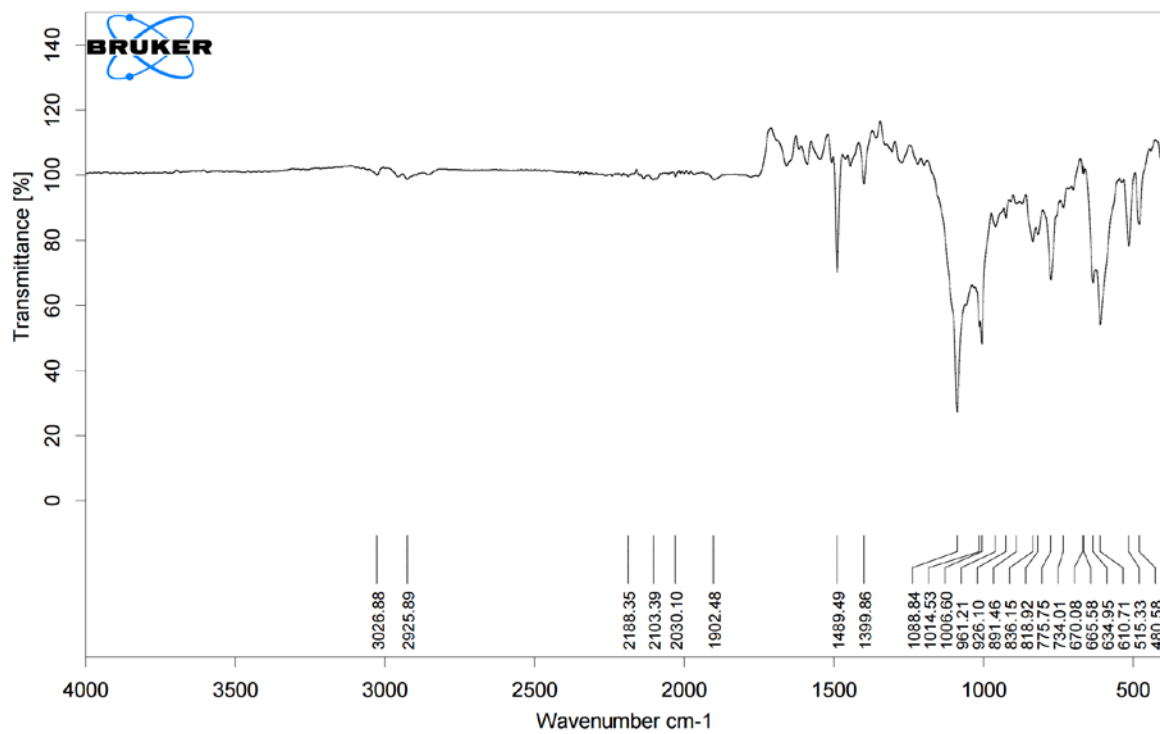

221111-01APCI-HRMS-Li-Ruohua Gui-RG-04-90 #972-885 RT: 9.02-9.05 AV: 14 NL: 3.32E7  
T: FTMS + p APCI corona Full ms [200.0000-600.4000]

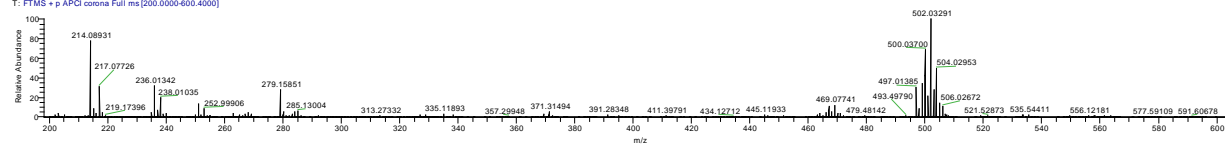

221111-01APCI-HRMS-Li-Ruohua Gui-RG-04-90 #972-885 RT: 9.02-9.05 AV: 14 NL: 1.06E7  
T: FTMS + p APCI corona Full ms [200.0000-600.4000]

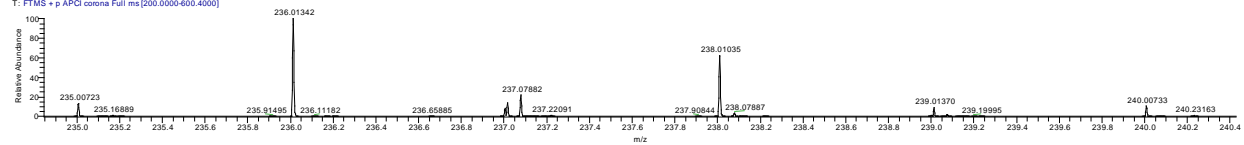

| m/z       | Intensity  | Relative | Resolution | Charge | Theo. Mass | Delta (ppm) | RDB equiv. | Composition                                                    |
|-----------|------------|----------|------------|--------|------------|-------------|------------|----------------------------------------------------------------|
| 236.01342 | 10869240.0 | 100.00   | 35771.10   | 1.00   | 236.01386  | -1.88       | 8.5        | C <sub>13</sub> H <sub>8</sub> 2H <sub>2</sub> Cl <sub>2</sub> |
|           |            |          |            |        | 236.01231  | 4.68        | 9.0        | C <sub>13</sub> H <sub>6</sub> 2H <sub>2</sub> Cl <sub>2</sub> |

| m/z       | Intensity | Relative | Resolution | Charge | Theo. Mass | Delta (ppm) | RDB equiv. | Composition                                                                     |
|-----------|-----------|----------|------------|--------|------------|-------------|------------|---------------------------------------------------------------------------------|
| 238.01035 | 6929178.5 | 100.00   | 35112.48   | 1.00   | 238.01039  | -0.15       | 13.5       | C <sub>13</sub> H <sub>8</sub> O <sub>4</sub> N                                 |
|           |           |          |            |        | 238.01091  | -2.34       | 8.5        | C <sub>13</sub> H <sub>8</sub> 2H <sub>2</sub> Cl <sub>1</sub> <sup>37</sup> Cl |
|           |           |          |            |        | 238.00936  | 4.16        | 9.0        | C <sub>13</sub> H <sub>6</sub> 2H <sub>2</sub> Cl <sub>1</sub> <sup>37</sup> Cl |

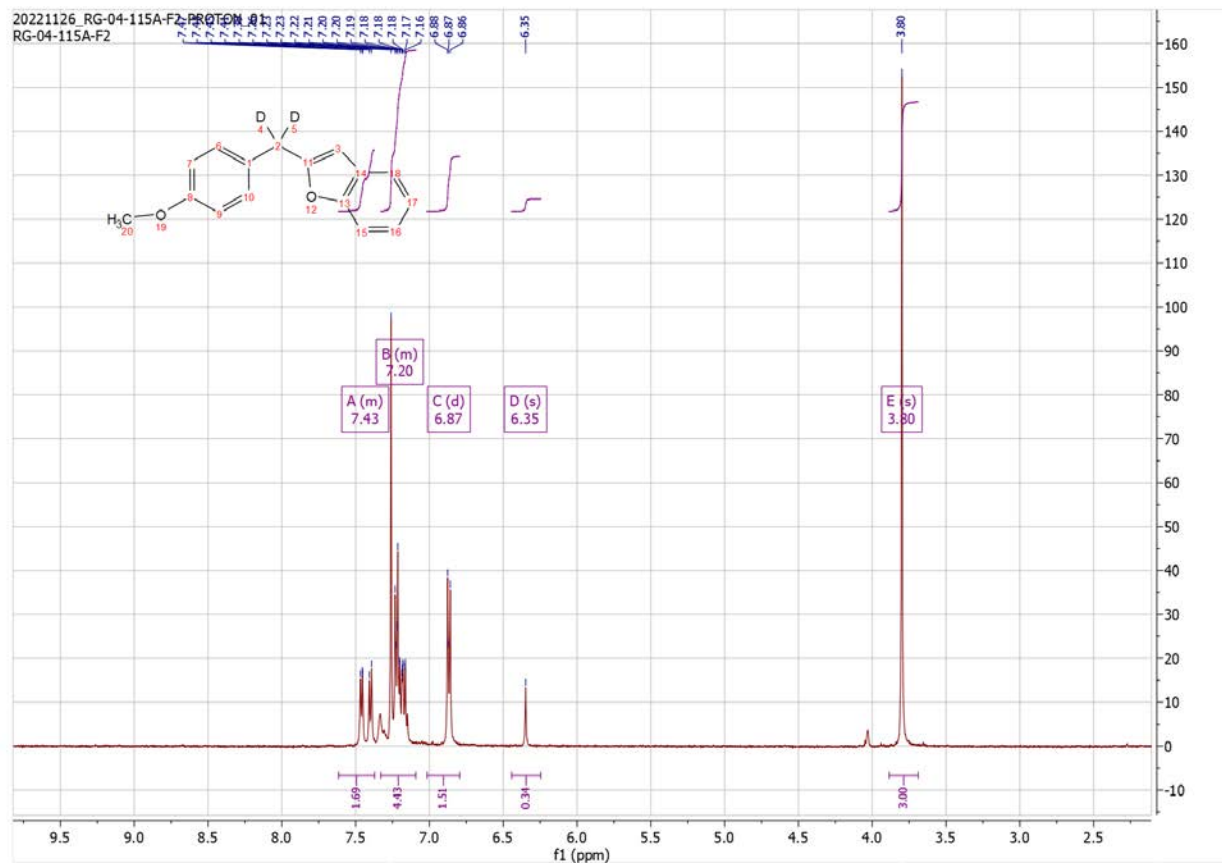

RG-04-115A-F2.1.fid  
Li  
1d\_DEUTERIUM CDCl3 D:\\ rgui 33

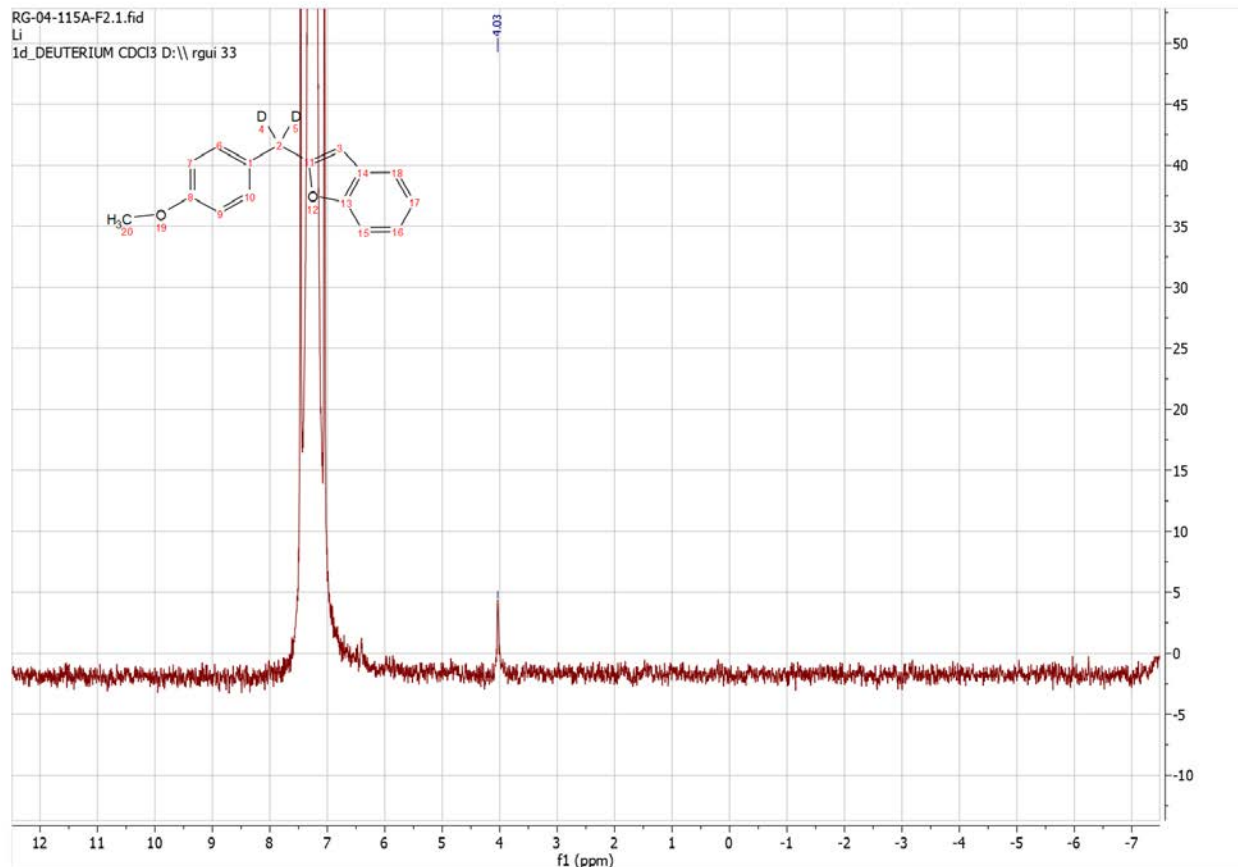

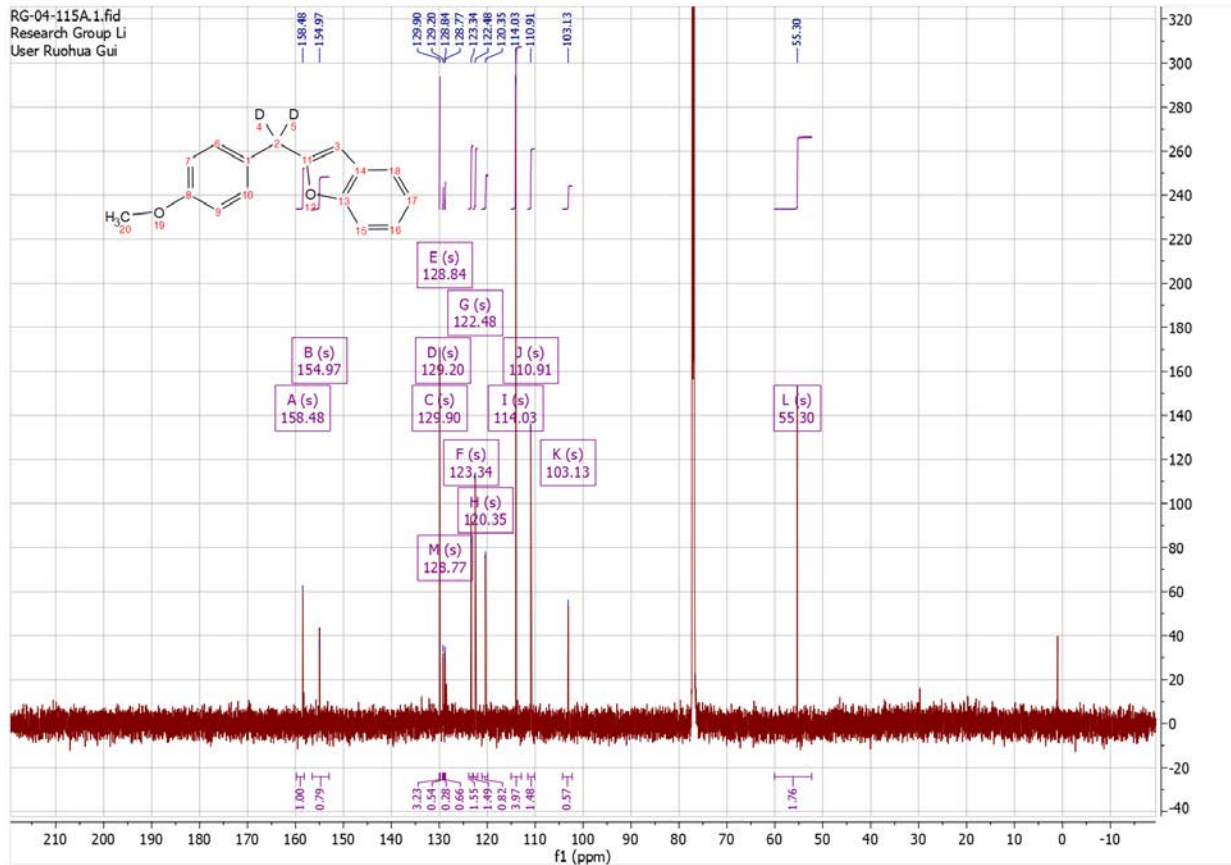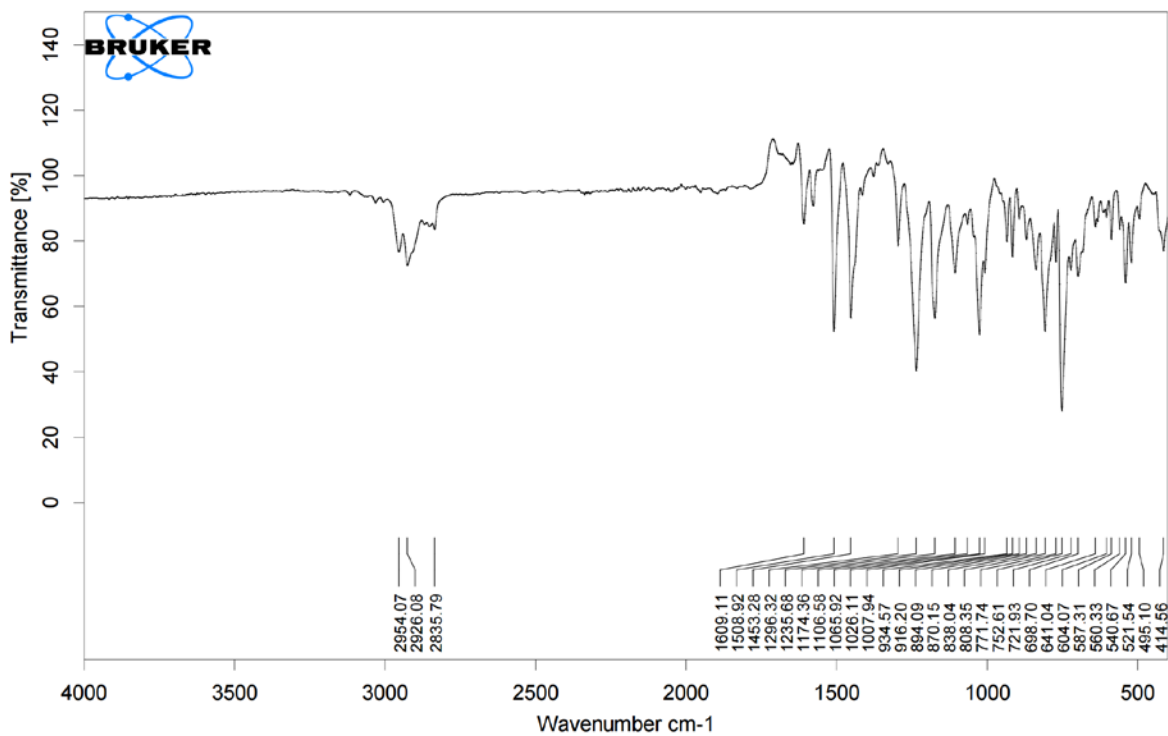

## Mass Spectrum SmartFormula Report

**Analysis Info**

Analysis Name D:\Data\LI\2022-11-28 Li-Gui RG-04-115A APCI +ve.d  
 Method APCI\_Tune\_pos\_Low\_AW Small.m  
 Sample Name 2022-11-28 Li-Gui RG-04-115A APCI +ve  
 Comment

Acquisition Date 11/28/2022 2:37:18 PM

Operator Alex  
 Instrument maXis impact 282001.00044

**Acquisition Parameter**

|             |            |                      |          |                  |           |
|-------------|------------|----------------------|----------|------------------|-----------|
| Source Type | APCI       | Ion Polarity         | Positive | Set Nebulizer    | 4.0 Bar   |
| Focus       | Not active | Set Capillary        | 4000 V   | Set Dry Heater   | 150 °C    |
| Scan Begin  | 90 m/z     | Set End Plate Offset | -500 V   | Set Dry Gas      | 1.5 l/min |
| Scan End    | 1250 m/z   | Set Charging Voltage | 2000 V   | Set Divert Valve | Source    |
|             |            | Set Corona           | 4000 nA  | Set APCI Heater  | 450 °C    |

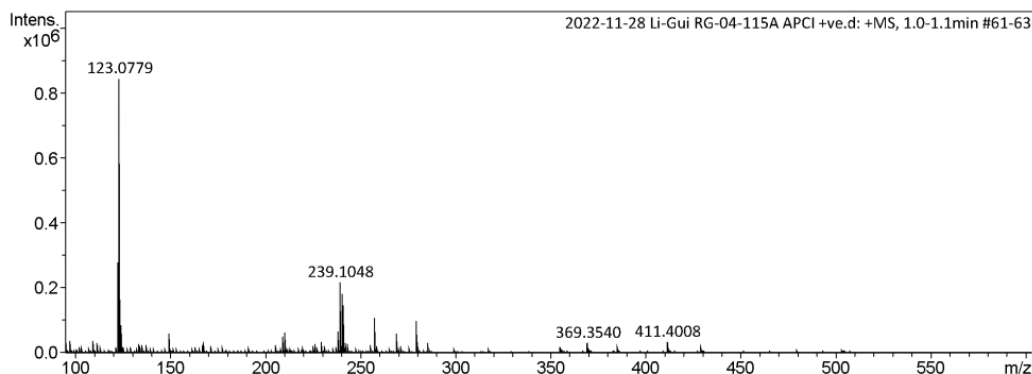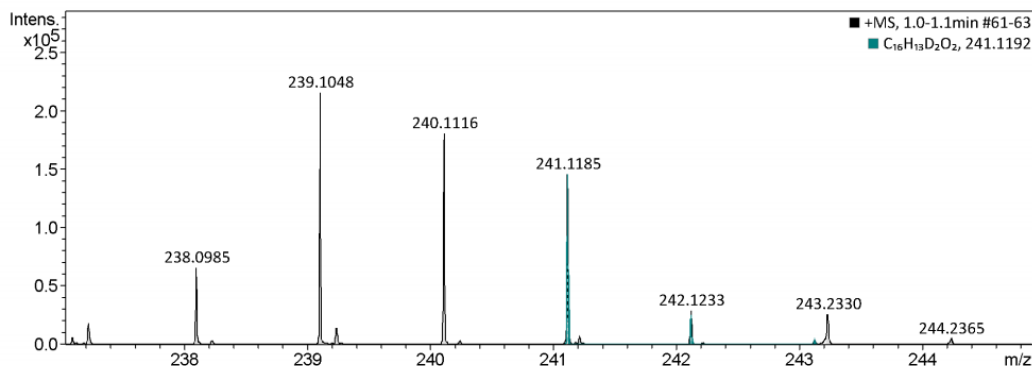

| Meas. m/z | # | Ion Formula                                                   | m/z      | err [ppm] | mSigma | # mSigma | Score  | rdb  | e <sup>-</sup> Conf | N-Rule |
|-----------|---|---------------------------------------------------------------|----------|-----------|--------|----------|--------|------|---------------------|--------|
| 238.0985  | 1 | C <sub>4</sub> H <sub>4</sub> D <sub>2</sub> N <sub>13</sub>  | 238.0989 | 1.7       | 661.6  | 1        | 100.00 | 8.5  | even                | ok     |
|           | 2 | C <sub>14</sub> H <sub>12</sub> N <sub>3</sub> O              | 238.0975 | -4.3      | 787.8  | 2        | 0.00   | 10.5 | even                | ok     |
| 239.1048  | 1 | C <sub>16</sub> H <sub>13</sub> D <sub>2</sub> O <sub>2</sub> | 239.1051 | 1.5       | 538.8  | 1        | 100.00 | 10.0 | odd                 | ok     |
|           | 2 | C <sub>16</sub> H <sub>11</sub> D <sub>2</sub> O <sub>2</sub> | 239.1036 | -5.0      | 538.9  | 2        | 62.45  | 10.5 | even                | ok     |
|           | 3 | C <sub>14</sub> H <sub>13</sub> N <sub>3</sub> O              | 239.1053 | 2.3       | 544.9  | 3        | 23.95  | 10.0 | odd                 | ok     |
|           | 4 | C <sub>14</sub> H <sub>11</sub> DN <sub>3</sub> O             | 239.1038 | -4.1      | 545.0  | 4        | 18.60  | 10.5 | even                | ok     |
| 240.1116  | 5 | C <sub>12</sub> H <sub>11</sub> N <sub>6</sub>                | 239.1040 | -3.3      | 551.1  | 5        | 5.46   | 10.5 | even                | ok     |
|           | 1 | C <sub>16</sub> H <sub>12</sub> D <sub>2</sub> O <sub>2</sub> | 240.1114 | -1.0      | 374.6  | 1        | 100.00 | 10.0 | odd                 | ok     |
|           | 2 | C <sub>14</sub> H <sub>12</sub> DN <sub>3</sub> O             | 240.1116 | -0.2      | 381.3  | 2        | 38.87  | 10.0 | odd                 | ok     |
|           | 3 | C <sub>12</sub> H <sub>12</sub> N <sub>6</sub>                | 240.1118 | 0.7       | 388.0  | 3        | 12.96  | 10.0 | odd                 | ok     |

20221118\_RG-04-103A-F6-PROTON\_01  
RG-04-103A-F6

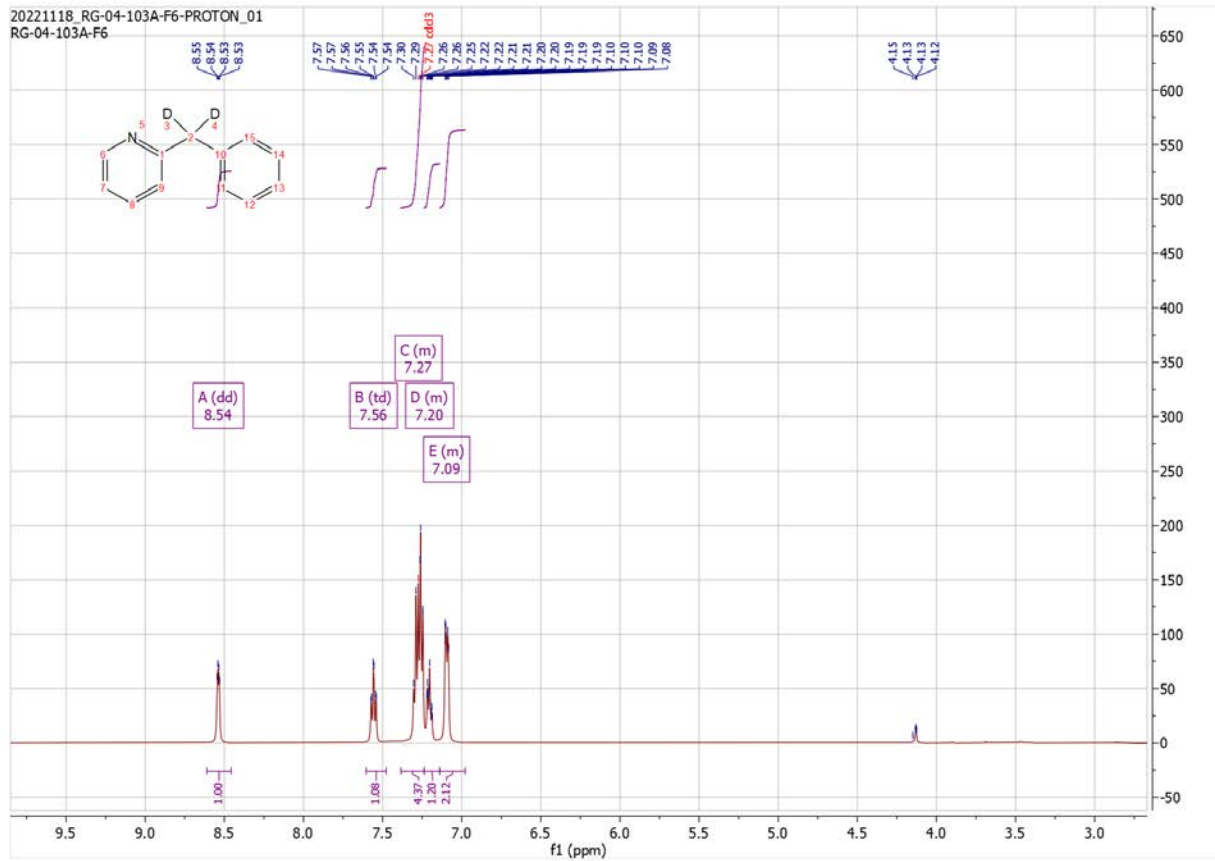

RG-04-103A-F6.1.fid  
Li  
1d\_2H CDCl3 D:\rgui 287

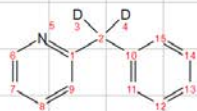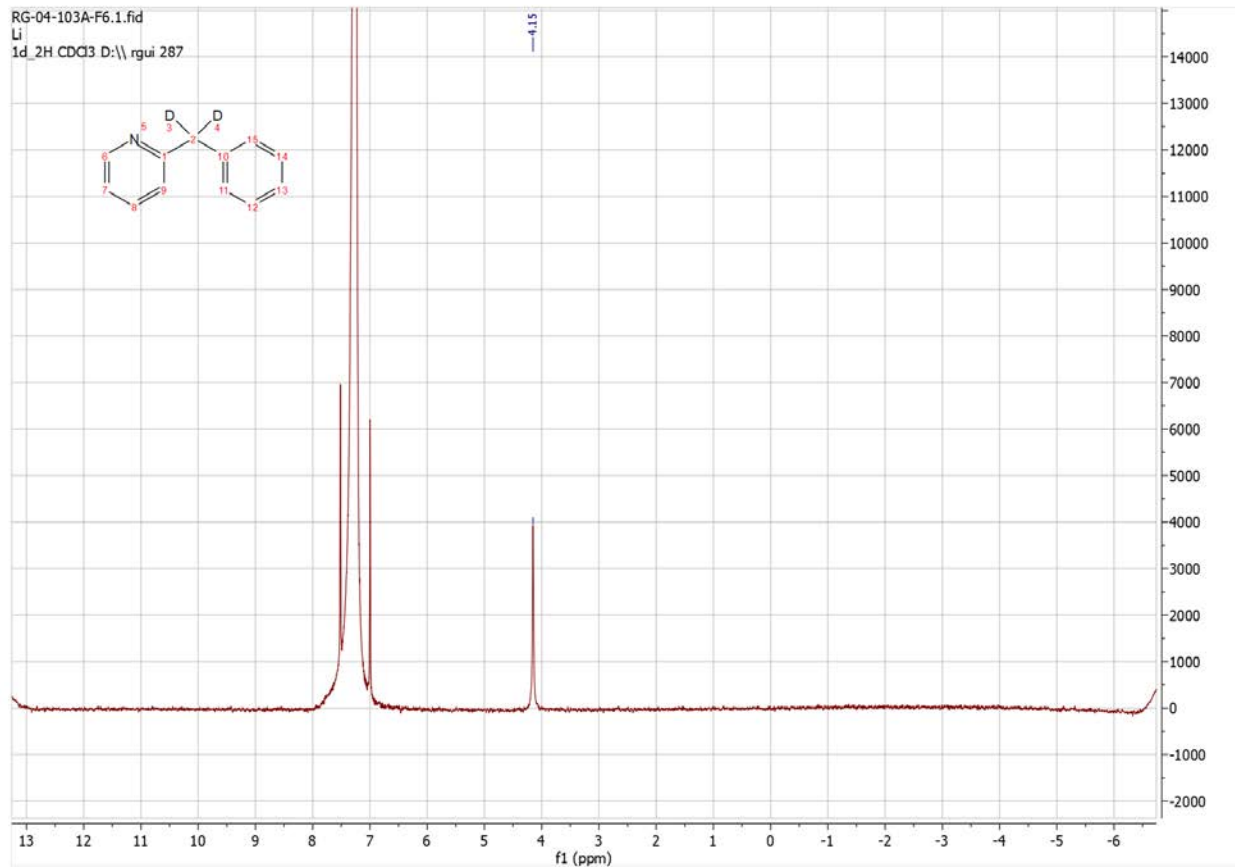



RG-04-103A-F6.2.fid  
 Research Group Li  
 User Ruohua

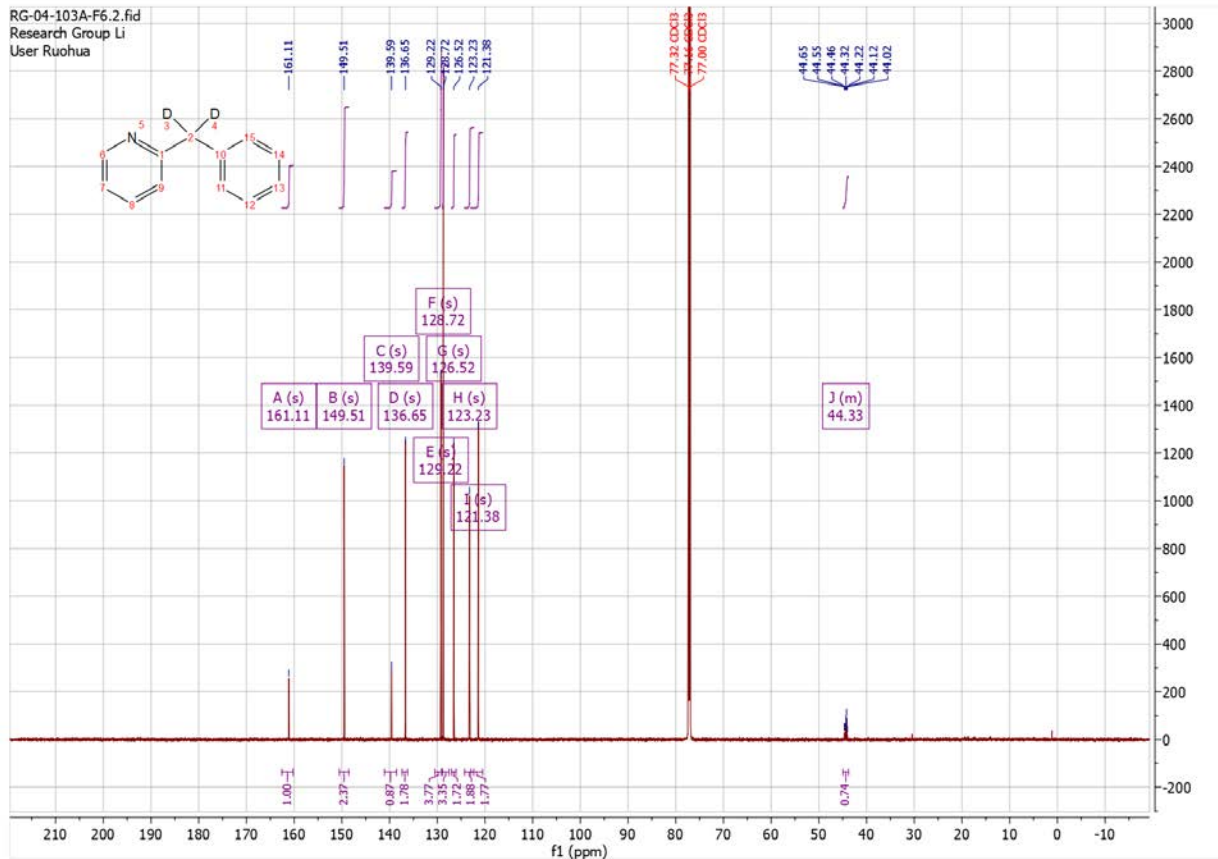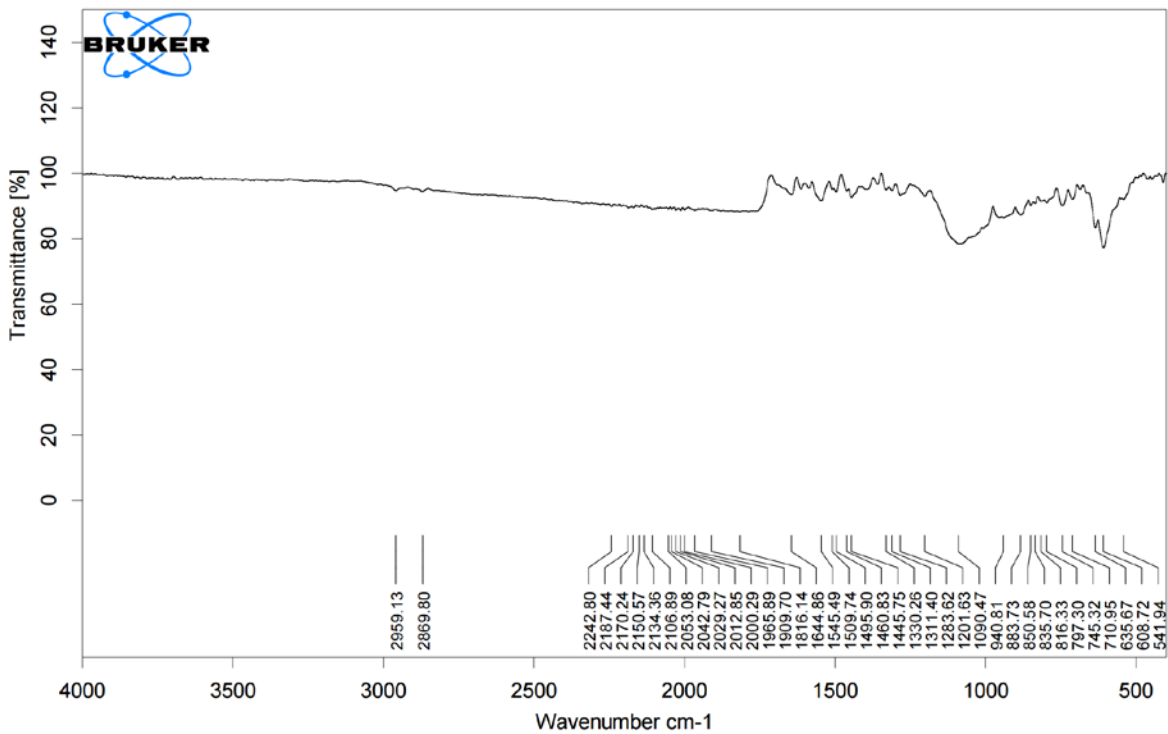

221123-03APCI- HRMS-Li-Ruohua Gui-RG-04-103A #724-781 RT: 5.11-5.28 AV: 40 NL: 4.24E9  
T: FTMS + p APCI corona Full ms [80.0000-500.0000]

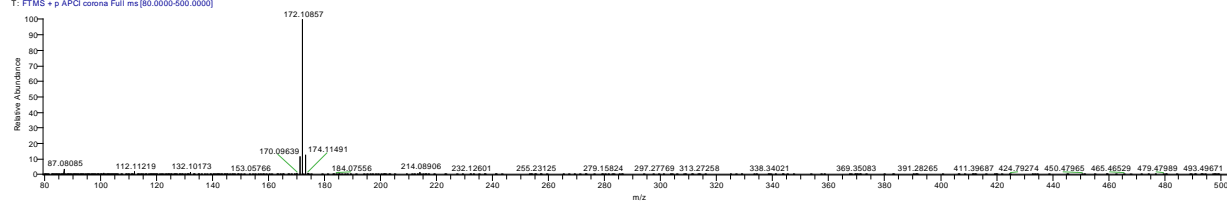

221123-03APCI- HRMS-Li-Ruohua Gui-RG-04-103A #724-781 RT: 5.11-5.28 AV: 40 NL: 4.24E9  
T: FTMS + p APCI corona Full ms [80.0000-500.0000]

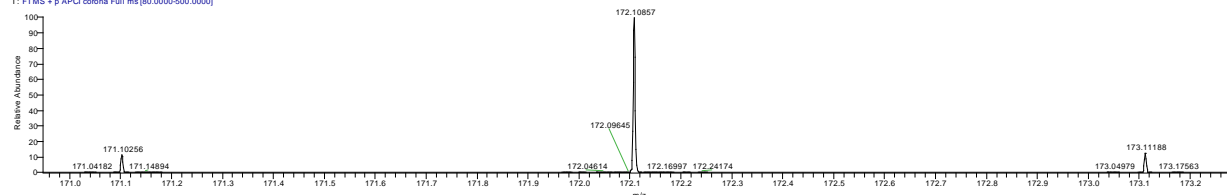

221123-03APCI- HRMS-Li-Ruohua Gui-RG-04-103A#724-781 RT: 5.11-5.28 AV: 40

T: FTMS + p APCI corona Full ms [80.0000-500.0000]

m/z = 172.10017-172.11565

| m/z       | Intensity    | Relative | Resolution | Charge | Theo. Mass | Delta (ppm) | RDB equiv. | Composition                                                   |
|-----------|--------------|----------|------------|--------|------------|-------------|------------|---------------------------------------------------------------|
| 172.10857 | 4290112000.0 | 100.00   | 40540.30   | 1.00   | 172.10898  | -2.41       | 7.5        | C <sub>12</sub> H <sub>10</sub> <sup>2</sup> H <sub>2</sub> N |

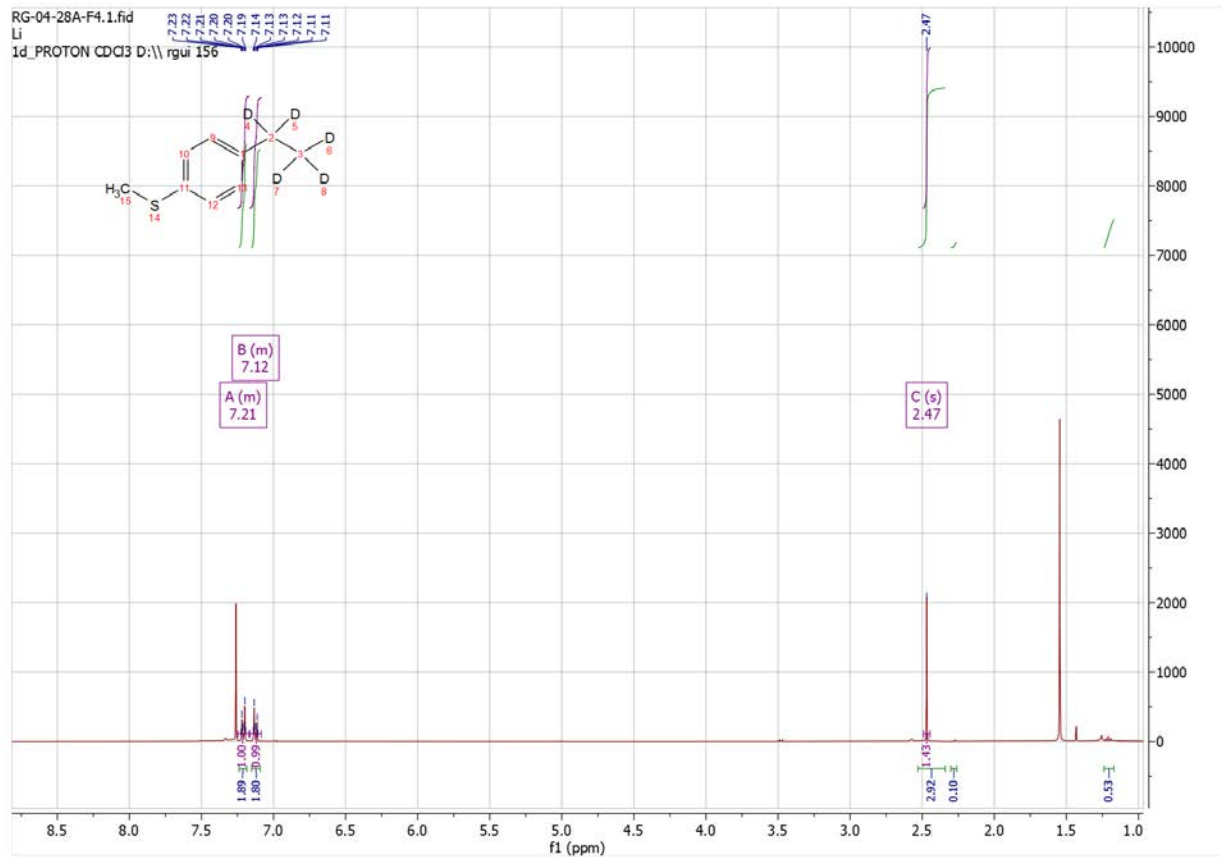

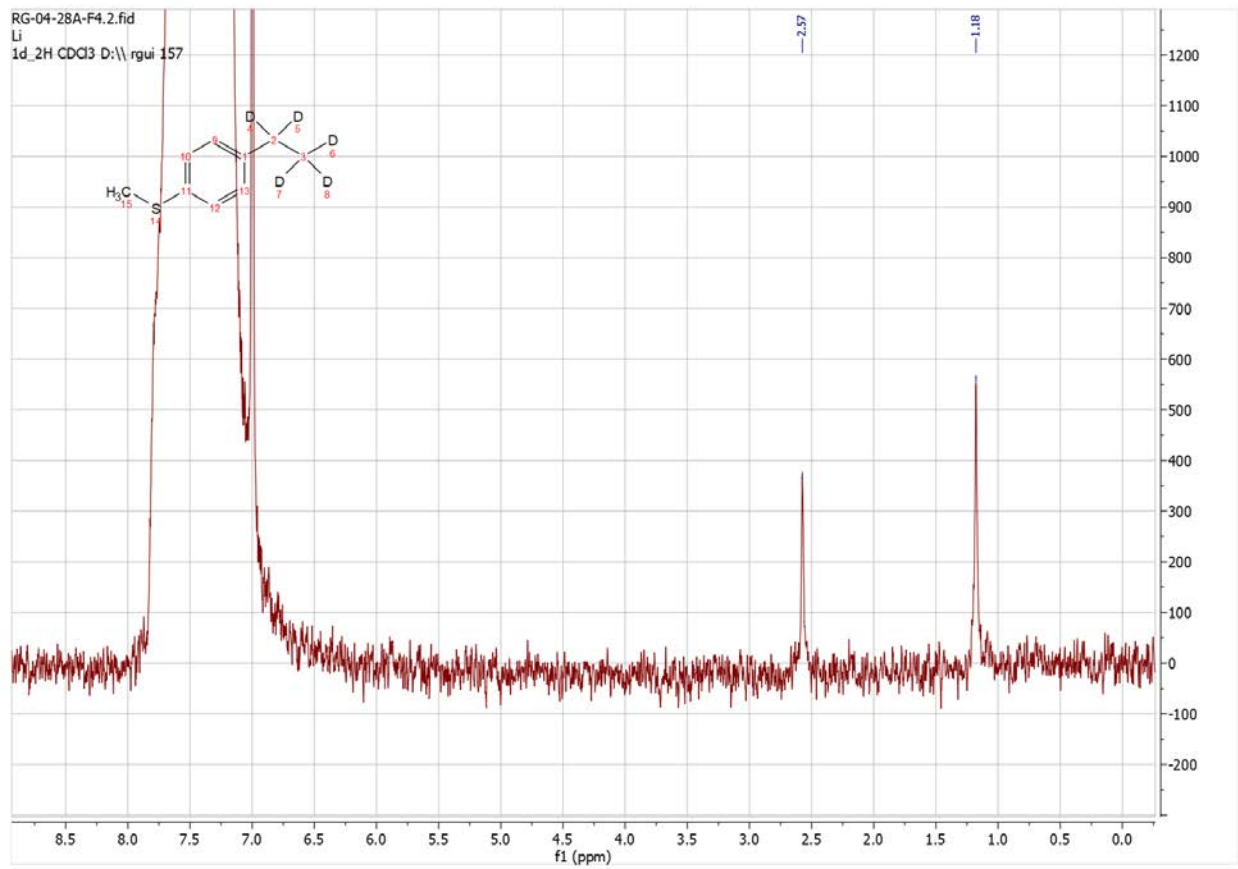

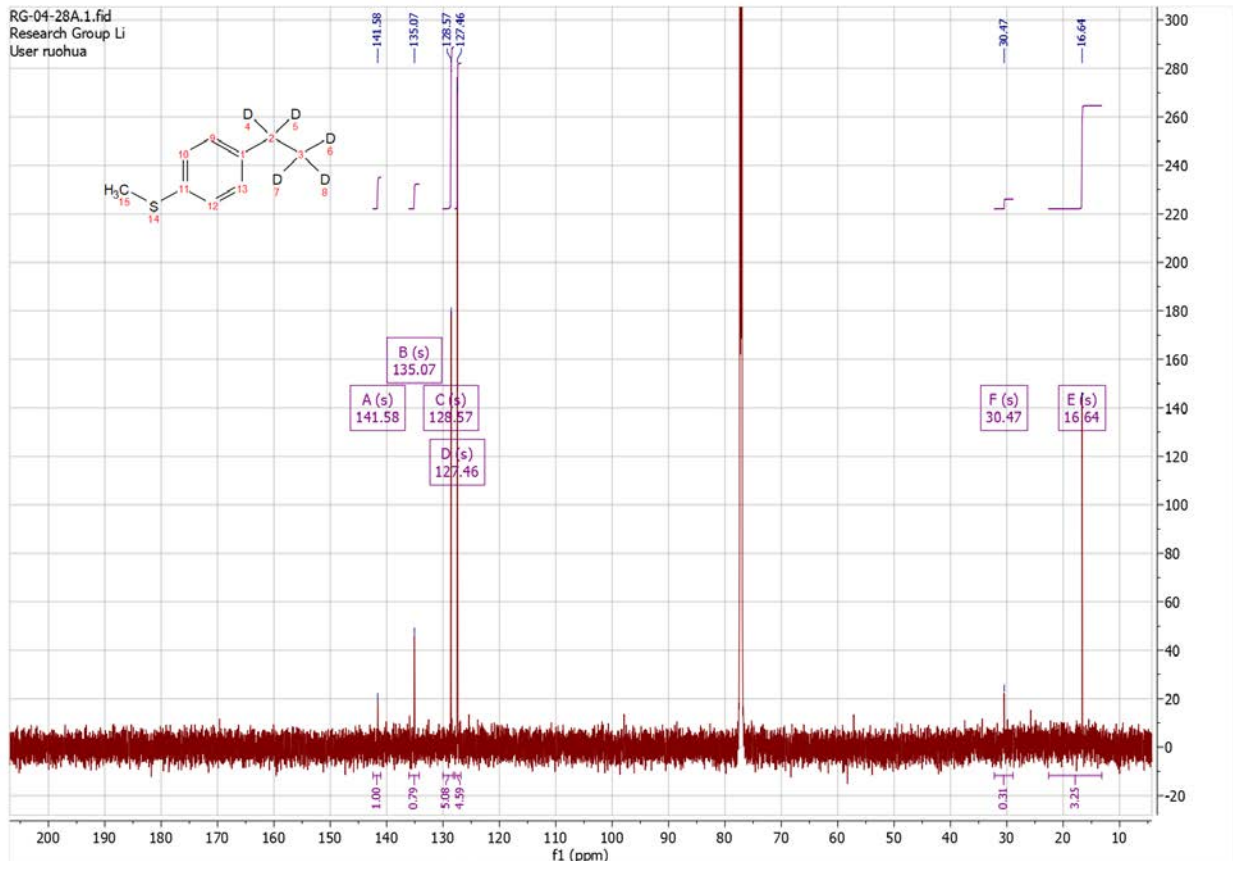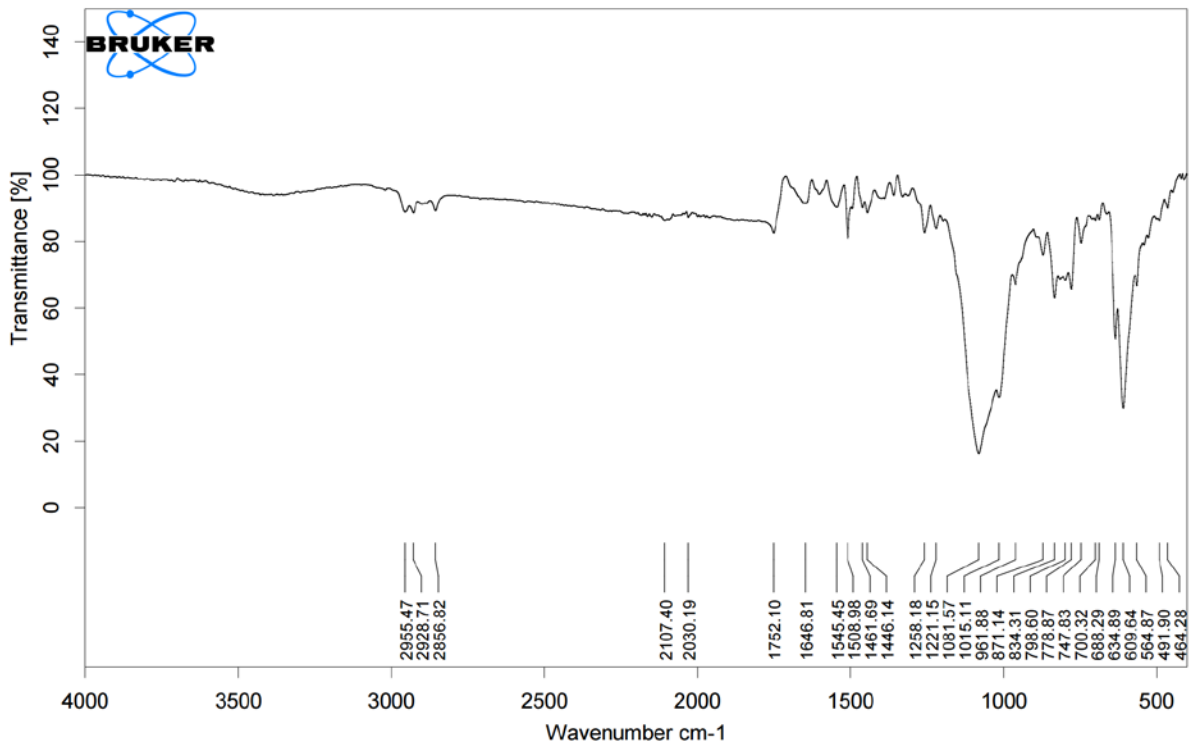

# Mass Spectrum SmartFormula Report

**Analysis Info**

Analysis Name D:\Data\Li\2022-09-13 Li-Gui RG-04-28A APCI +ve.d  
 Method APCI\_Tune\_pos\_Low\_AW\_Small.m  
 Sample Name 2022-09-13 Li-Gui RG-04-28A APCI +ve  
 Comment

Acquisition Date 9/13/2022 4:19:34 PM  
 Operator Alex  
 Instrument maXis impact 282001.00044

**Acquisition Parameter**

|             |            |                      |          |                  |           |
|-------------|------------|----------------------|----------|------------------|-----------|
| Source Type | APCI       | Ion Polarity         | Positive | Set Nebulizer    | 4.0 Bar   |
| Focus       | Not active | Set Capillary        | 4000 V   | Set Dry Heater   | 150 °C    |
| Scan Begin  | 90 m/z     | Set End Plate Offset | -500 V   | Set Dry Gas      | 1.5 l/min |
| Scan End    | 1250 m/z   | Set Charging Voltage | 2000 V   | Set Divert Valve | Source    |
|             |            | Set Corona           | 4000 nA  | Set APCI Heater  | 450 °C    |

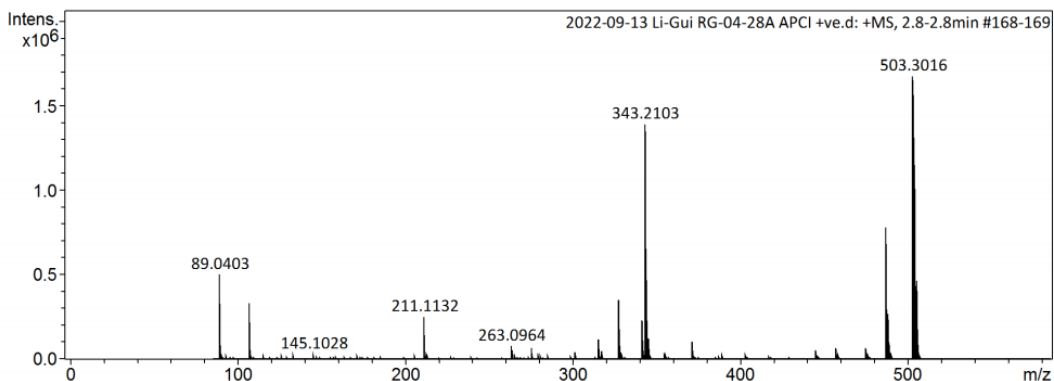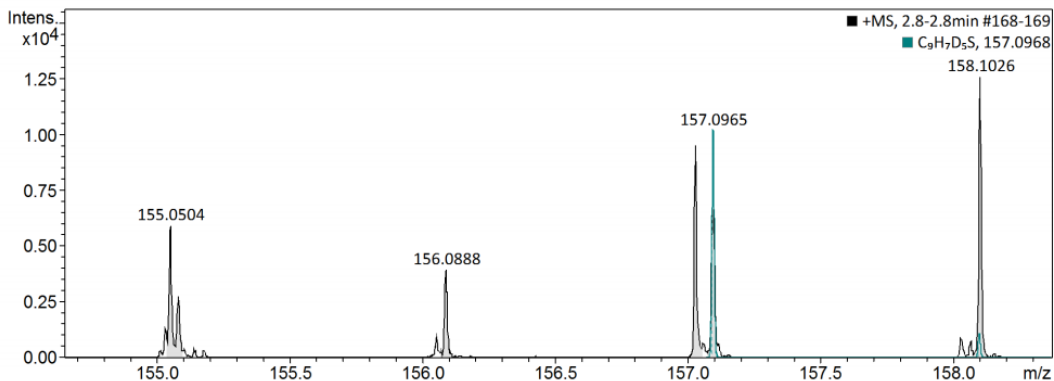

| Meas. m/z | # | Ion Formula | m/z      | err [ppm] | mSigma | # mSigma | Score  | rdb | e <sup>-</sup> Conf | N-Rule |
|-----------|---|-------------|----------|-----------|--------|----------|--------|-----|---------------------|--------|
| 156.0888  | 1 | C9H6D5S     | 156.0890 | 1.0       | 627.0  | 1        | 100.00 | 4.5 | even                | ok     |
|           | 2 | C12H6D3     | 156.0887 | -0.8      | 799.6  | 2        | 0.00   | 8.5 | even                | ok     |
|           | 3 | C7H12N2O2   | 156.0893 | 3.2       | 812.9  | 3        | 0.00   | 3.0 | odd                 | ok     |
| 157.0300  | 1 | C7H7DO2S    | 157.0302 | 1.3       | n.a.   | 1        | 100.00 | 4.0 | odd                 | ok     |
|           | 2 | C3H3D3O7    | 157.0296 | -2.5      | n.a.   | 2        | 92.34  | 1.0 | odd                 | ok     |
|           | 3 | C5H7N3OS    | 157.0304 | 2.6       | n.a.   | 3        | 91.17  | 4.0 | odd                 | ok     |
| 157.0965  | 1 | C9H7D5S     | 157.0968 | 1.8       | 528.6  | 1        | 100.00 | 4.0 | odd                 | ok     |
| 158.1026  | 1 | C9H8D5S     | 158.1046 | 12.8      | n.a.   | 1        | 100.00 | 3.5 | even                | ok     |
|           | 2 | C8H16NS     | 158.0998 | -17.8     | n.a.   | 2        | 50.81  | 1.5 | even                | ok     |

RG-04-40B.1.fid  
Li  
1d\_PROTON CDCl3 D:\rgui 16

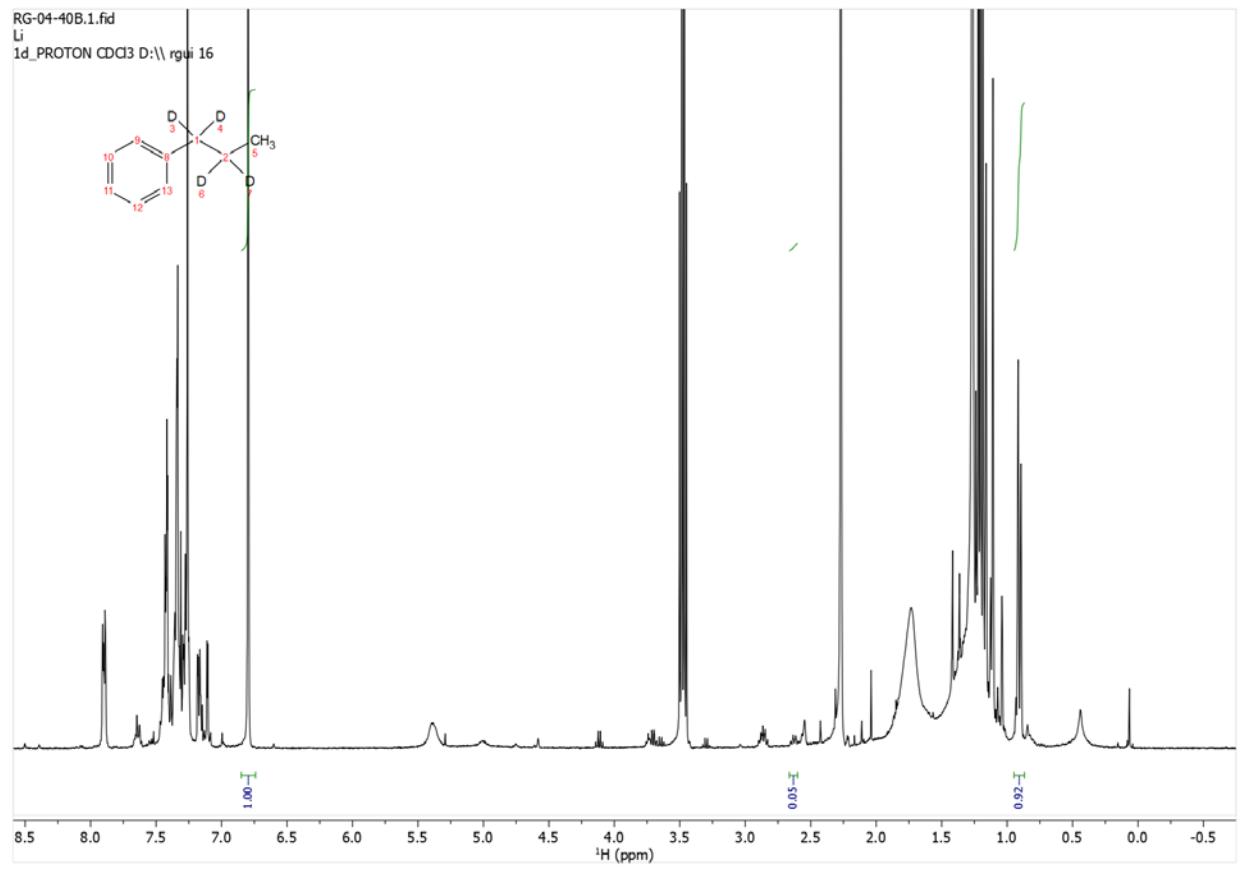

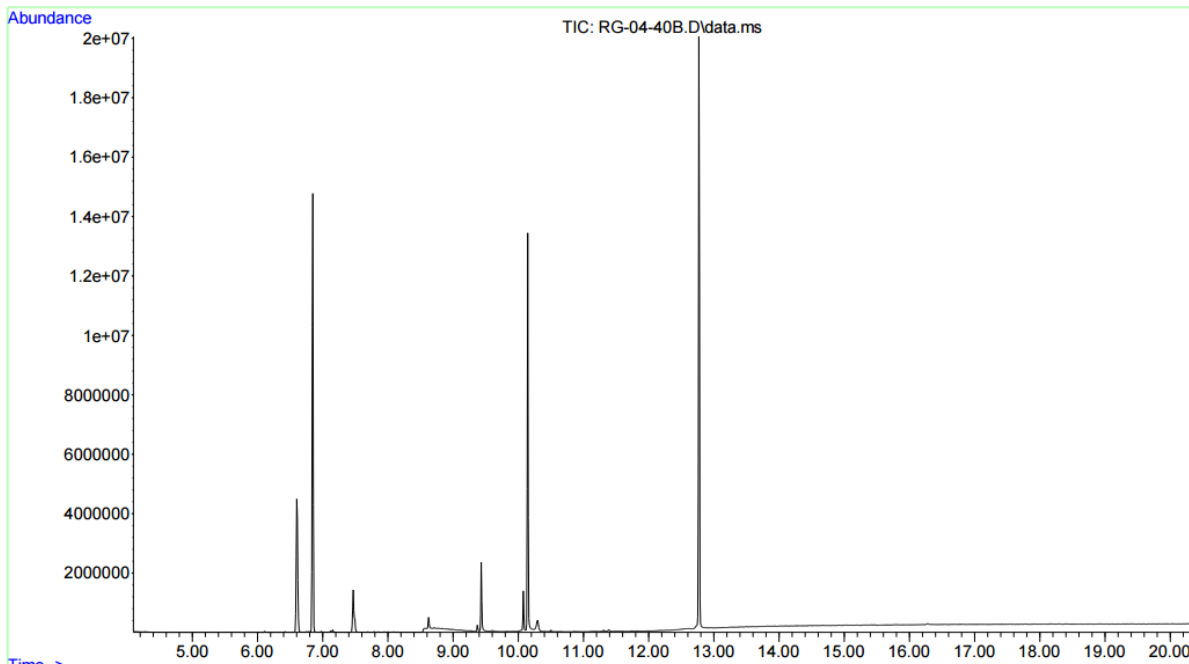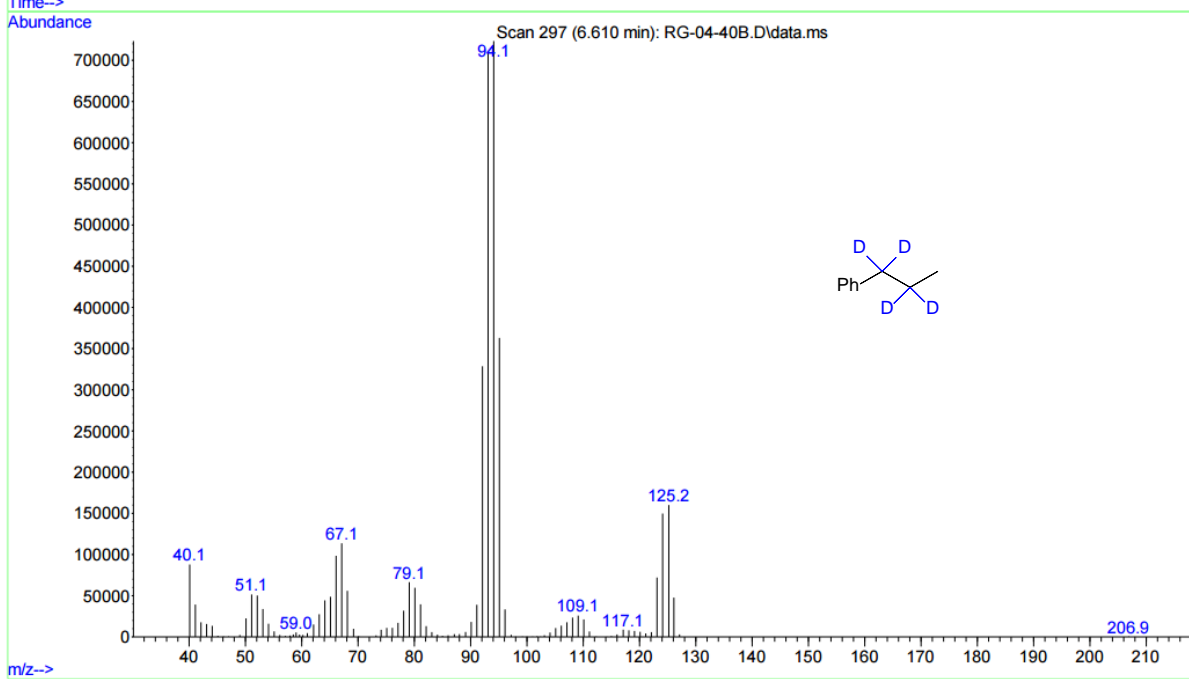

20220909\_RG-04-27A\_PROTON\_01  
RG-04-27A

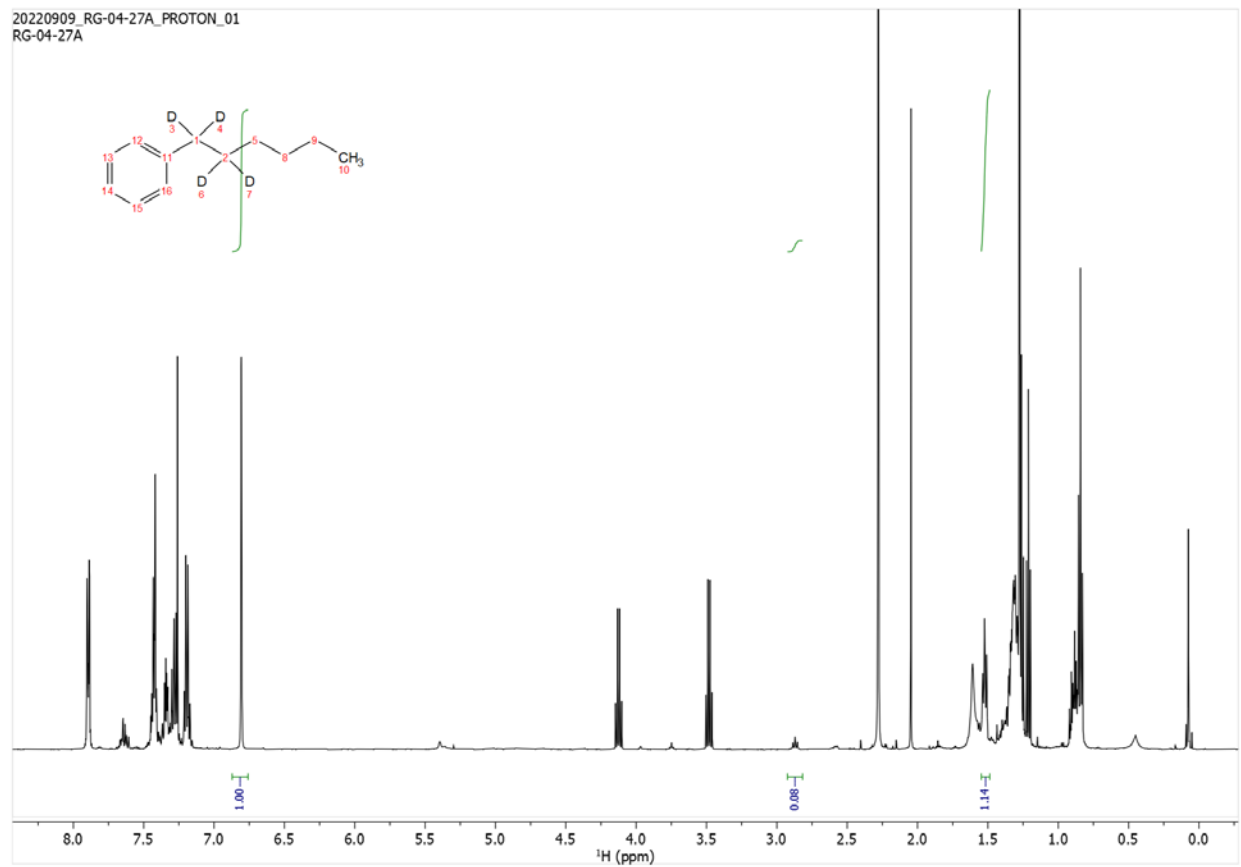



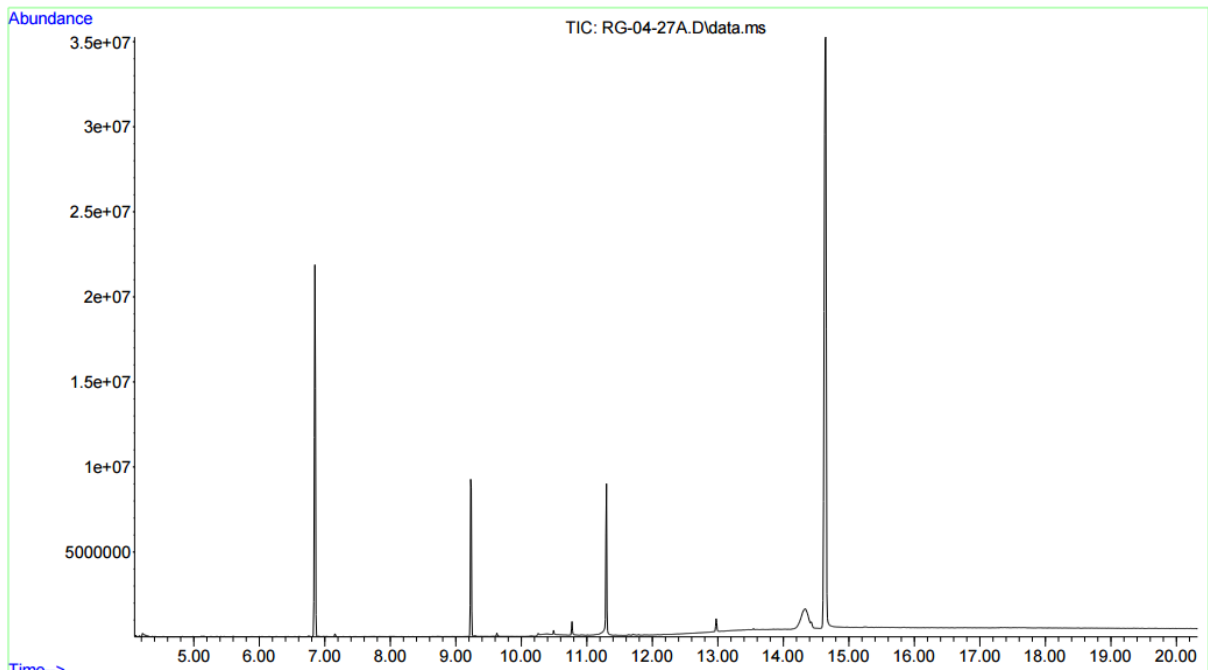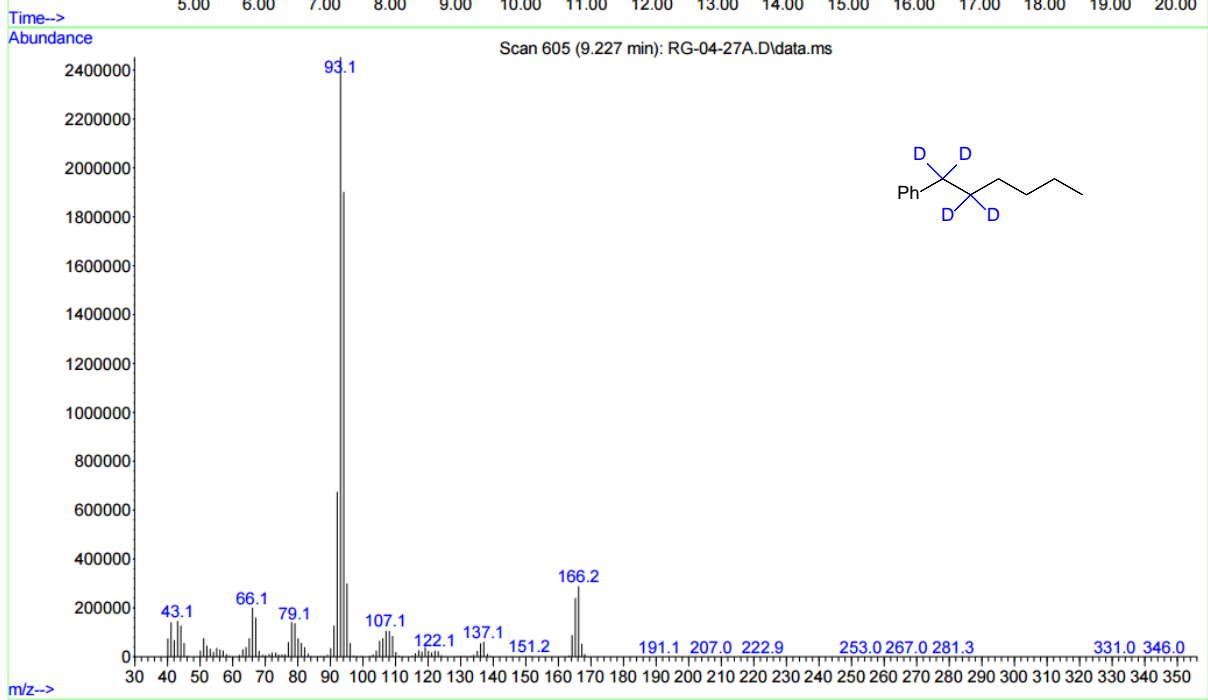

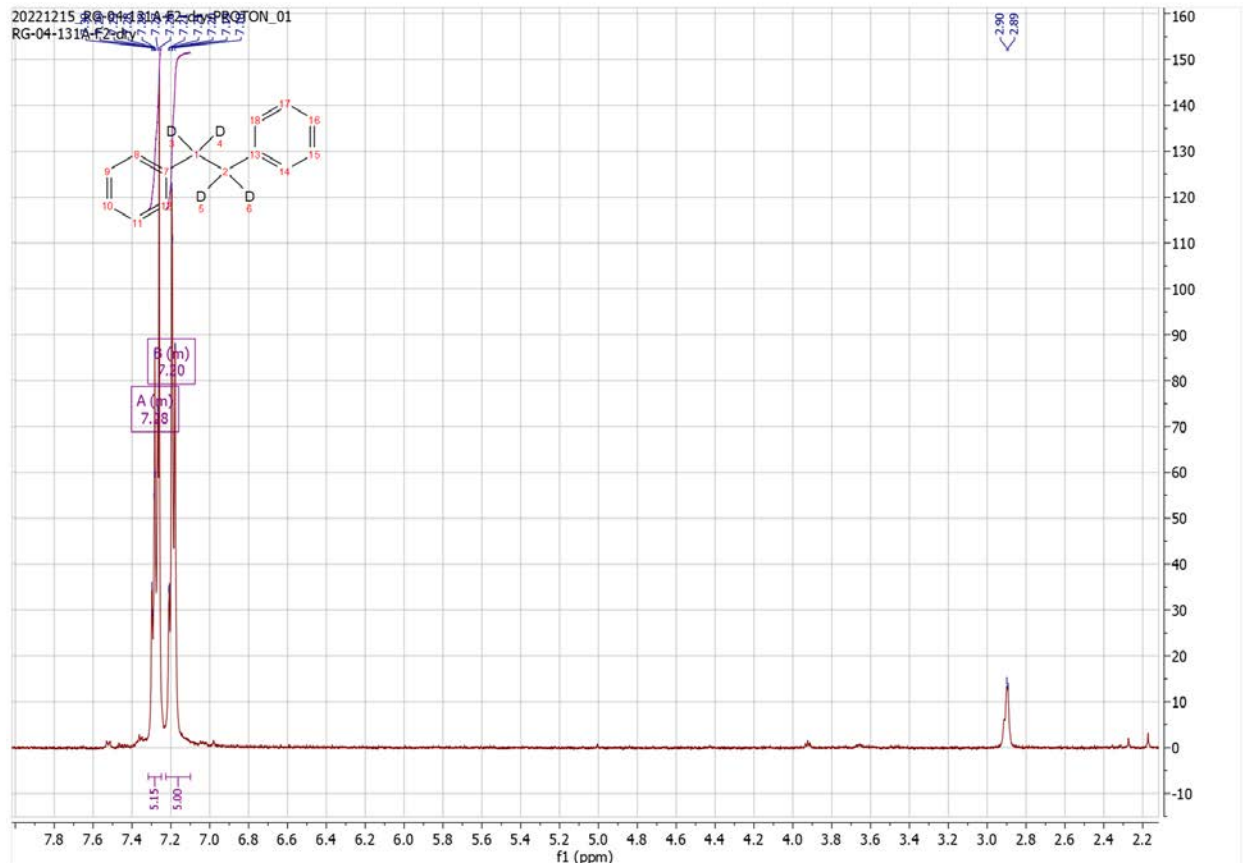

RG-04-131A-F2.1.fid  
Li  
1d\_2H CDCl3 D:\ rqui 169

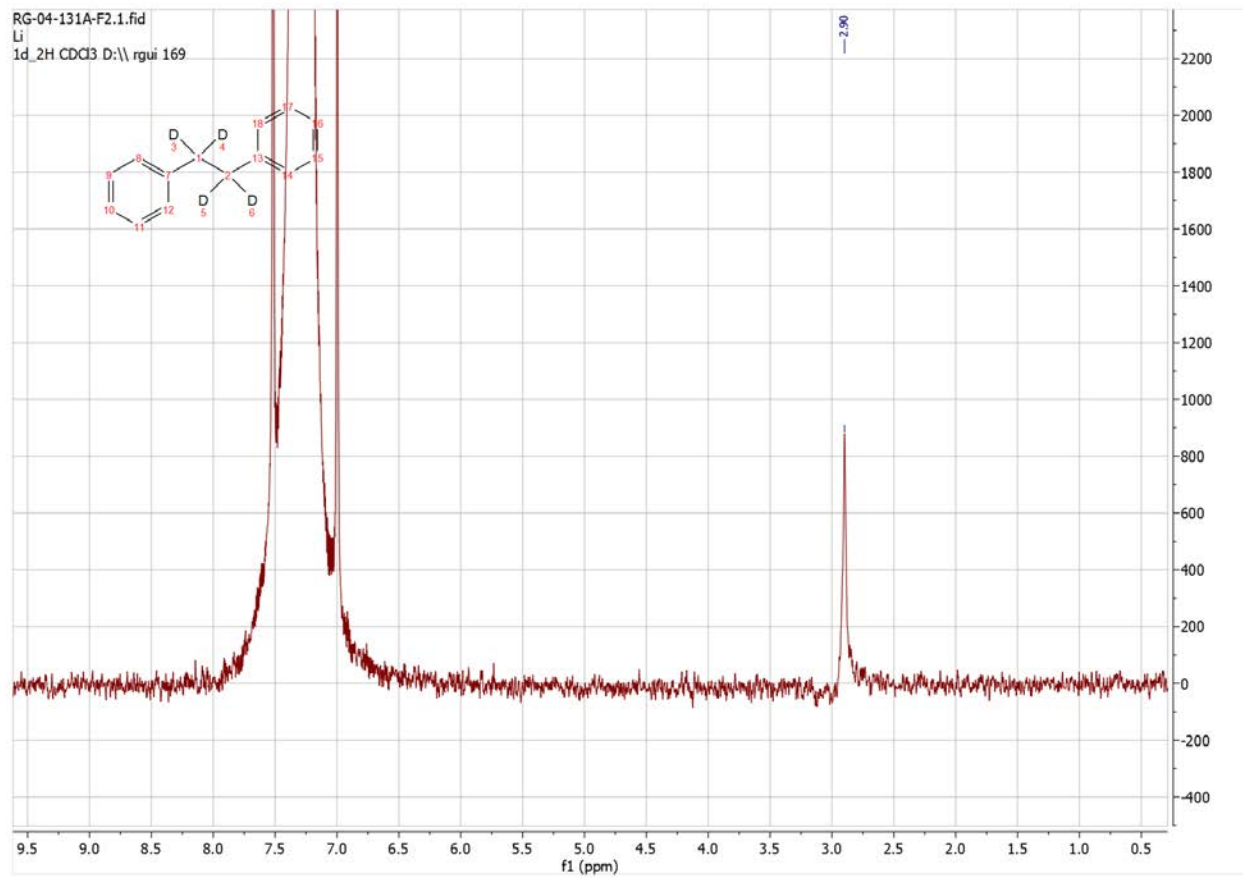

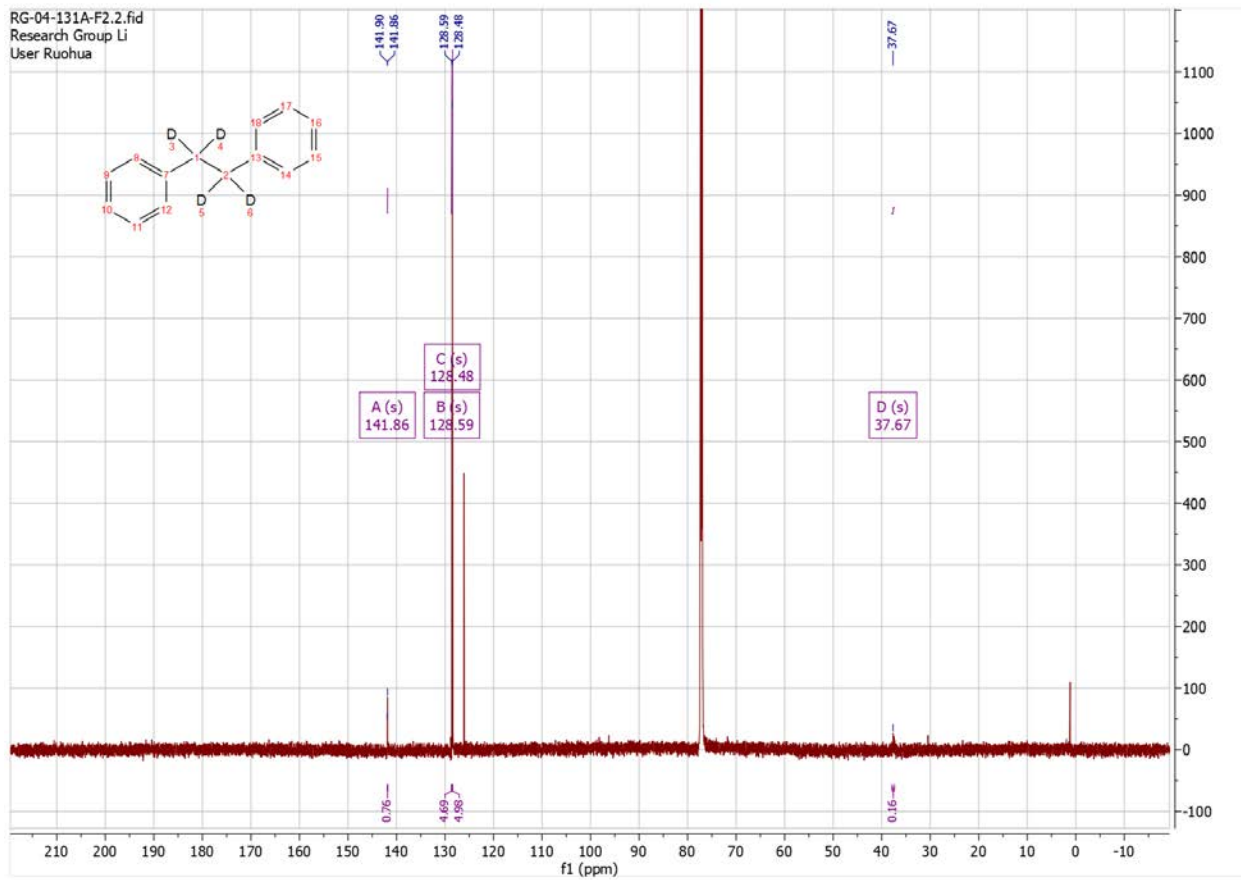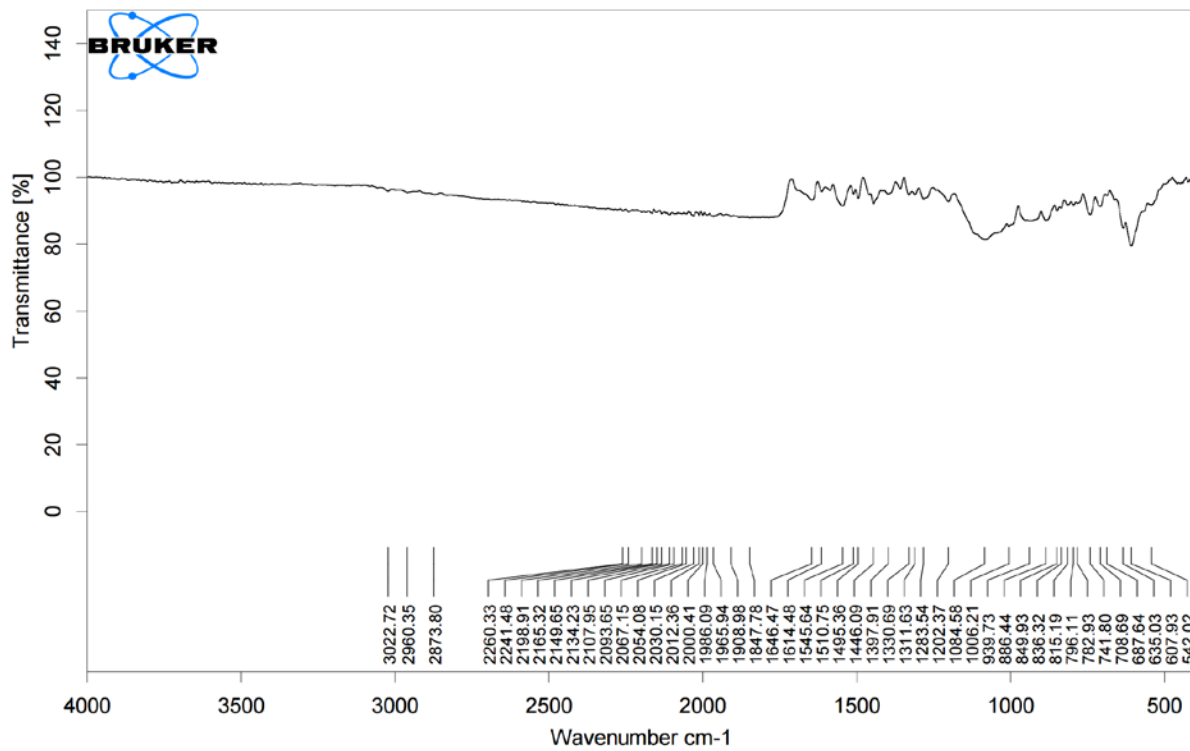

# Mass Spectrum SmartFormula Report

**Analysis Info**

Analysis Name D:\Data\LI\2023-01-13 Li-Gui RG-04-131 APCI +ve.d  
 Method APCI\_Tune\_pos\_Low\_AW Small.m  
 Sample Name 2023-01-13 Li-Gui RG-04-131 APCI +ve  
 Comment

Acquisition Date 1/13/2023 12:46:48 PM

Operator Alex  
 Instrument maXis impact 282001.00044

**Acquisition Parameter**

|             |            |                      |          |                  |           |
|-------------|------------|----------------------|----------|------------------|-----------|
| Source Type | APCI       | Ion Polarity         | Positive | Set Nebulizer    | 4.0 Bar   |
| Focus       | Not active | Set Capillary        | 4000 V   | Set Dry Heater   | 150 °C    |
| Scan Begin  | 90 m/z     | Set End Plate Offset | -500 V   | Set Dry Gas      | 1.5 l/min |
| Scan End    | 1500 m/z   | Set Charging Voltage | 2000 V   | Set Divert Valve | Source    |
|             |            | Set Corona           | 4000 nA  | Set APCI Heater  | 450 °C    |

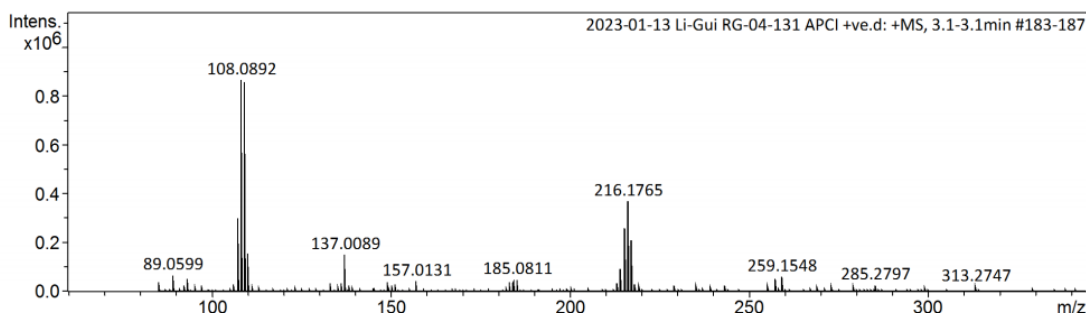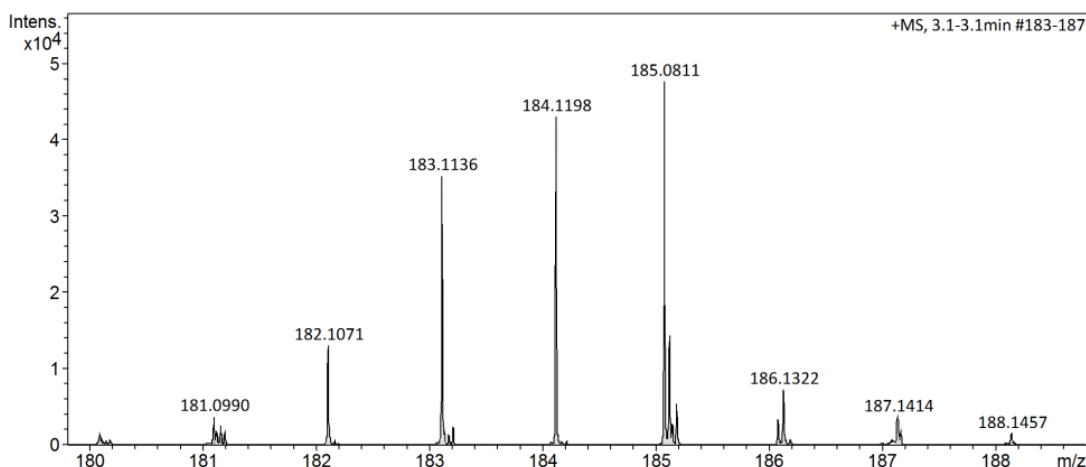

| Meas. m/z | # | Ion Formula | m/z      | err [ppm] | mSigma | # mSigma | Score  | rdb | e <sup>-</sup> Conf | N-Rule |
|-----------|---|-------------|----------|-----------|--------|----------|--------|-----|---------------------|--------|
|           | 2 | C14H12D     | 182.1075 | 1.7       | 798.7  | 2        | 100.00 | 8.5 | even                | ok     |
|           | 3 | C14H10D2    | 182.1059 | -6.8      | 798.8  | 3        | 59.43  | 9.0 | odd                 | ok     |
|           | 4 | C10H4D6NO2  | 182.1083 | 6.1       | 810.4  | 4        | 1.48   | 6.5 | even                | ok     |
| 183.1136  | 1 | C14H11D2    | 183.1137 | 0.5       | 533.4  | 1        | 100.00 | 8.5 | even                | ok     |
| 184.1198  | 1 | C14H12D2    | 184.1216 | 9.4       | 138.3  | 1        | 41.92  | 8.0 | odd                 | ok     |
|           | 2 | C14H10D3    | 184.1200 | 1.0       | 138.4  | 2        | 100.00 | 8.5 | even                | ok     |
|           | 3 | C14H8D4     | 184.1185 | -7.4      | 138.5  | 3        | 53.39  | 9.0 | odd                 | ok     |
| 185.0811  | 1 | C8HD6N2O3   | 185.0828 | 8.9       | 14.8   | 7        | 47.08  | 6.5 | even                | ok     |
|           | 2 | C10H7DN4    | 185.0806 | -2.8      | 30.3   | 10       | 64.97  | 9.0 | odd                 | ok     |
|           | 3 | C10H9N4     | 185.0822 | 5.6       | 30.5   | 11       | 48.92  | 8.5 | even                | ok     |
|           | 4 | C12H7D2NO   | 185.0804 | -3.9      | 36.9   | 12       | 49.56  | 9.0 | odd                 | ok     |
|           | 5 | C12H9DNO    | 185.0820 | 4.5       | 37.1   | 13       | 46.40  | 8.5 | even                | ok     |
| 186.1322  | 1 | C14H10D4    | 186.1341 | 10.3      | 227.5  | 1        | 40.14  | 8.0 | odd                 | ok     |
|           | 2 | C14H8D5     | 186.1326 | 1.9       | 227.6  | 2        | 100.00 | 8.5 | even                | ok     |
|           | 3 | C14H6D6     | 186.1310 | -6.4      | 227.7  | 3        | 63.72  | 9.0 | odd                 | ok     |
